# Supplementary material for: Systematic Studies on Anti-Cancer Evaluation of Stilbene and Dibenzo[b,f]oxepine Derivatives
Source: MDPI journal article supplement (doi:10.3390/molecules28083558), 2023-04-18
Supplement: s1 [file s1]

Systematic studies on anti-cancer evaluation of  
stilbene and dibenzo[*b,f*]oxepine derivatives

**Supplementary Materials**

Figure S1-S54. NMR spectra of obtained compounds

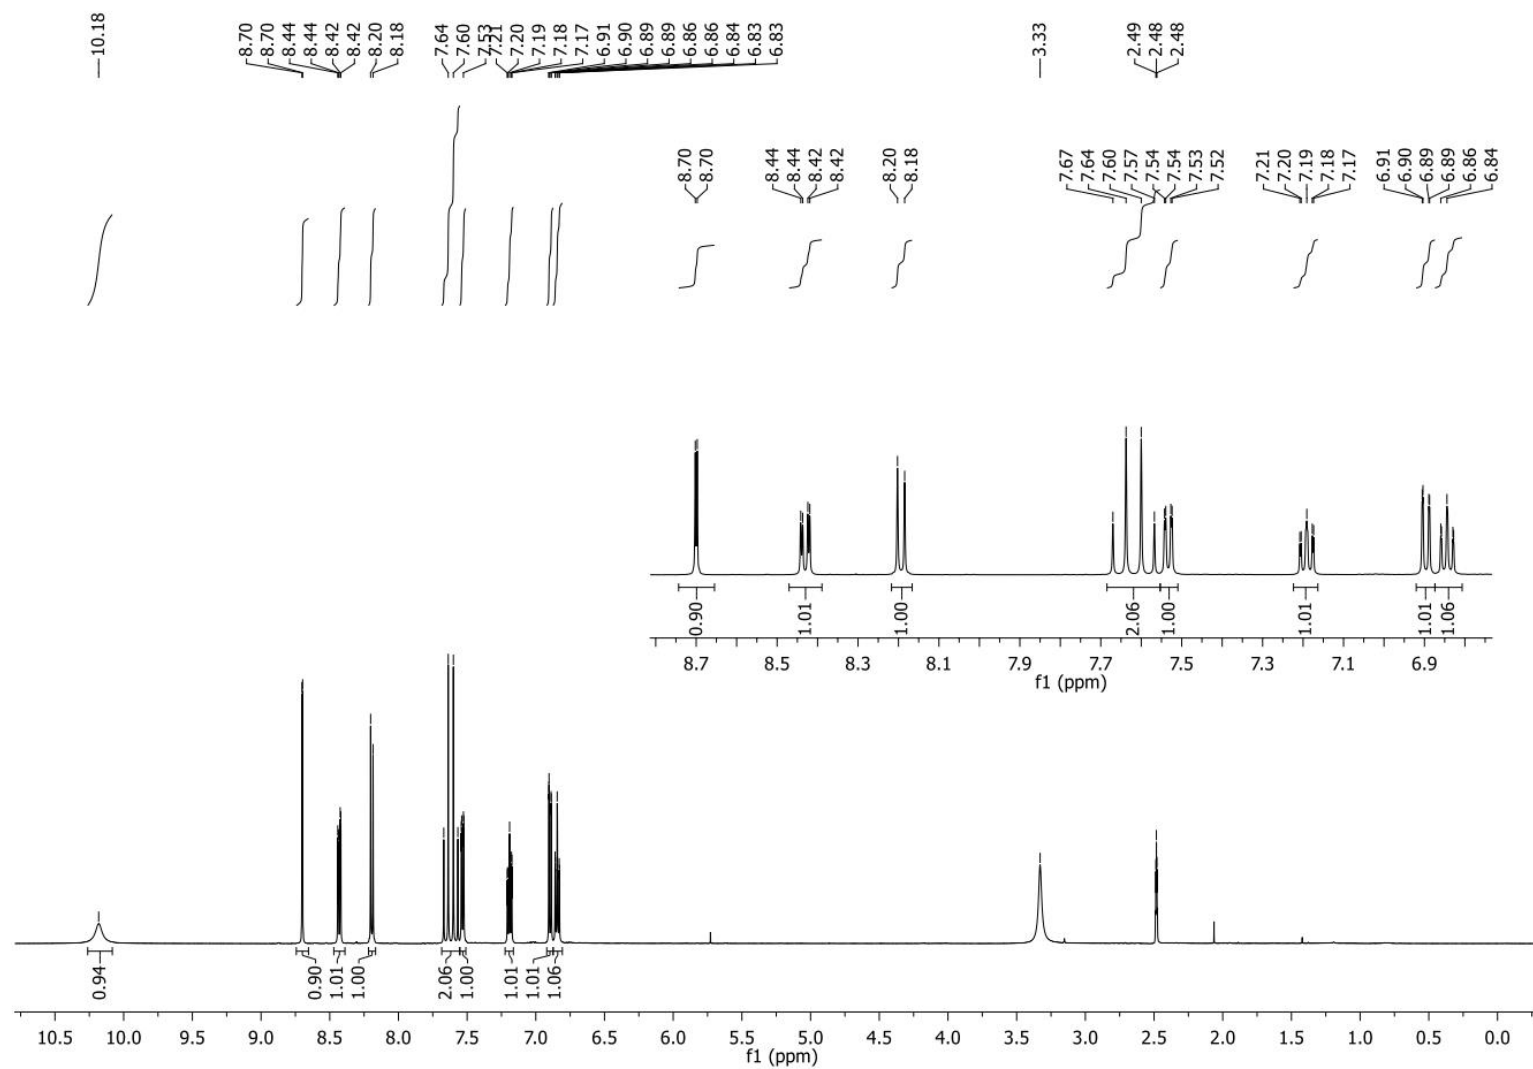

Figure S1. The <sup>1</sup>H NMR of (*E*)-2-hydroxy-2',4'-dinitrostilbene (**1a**).

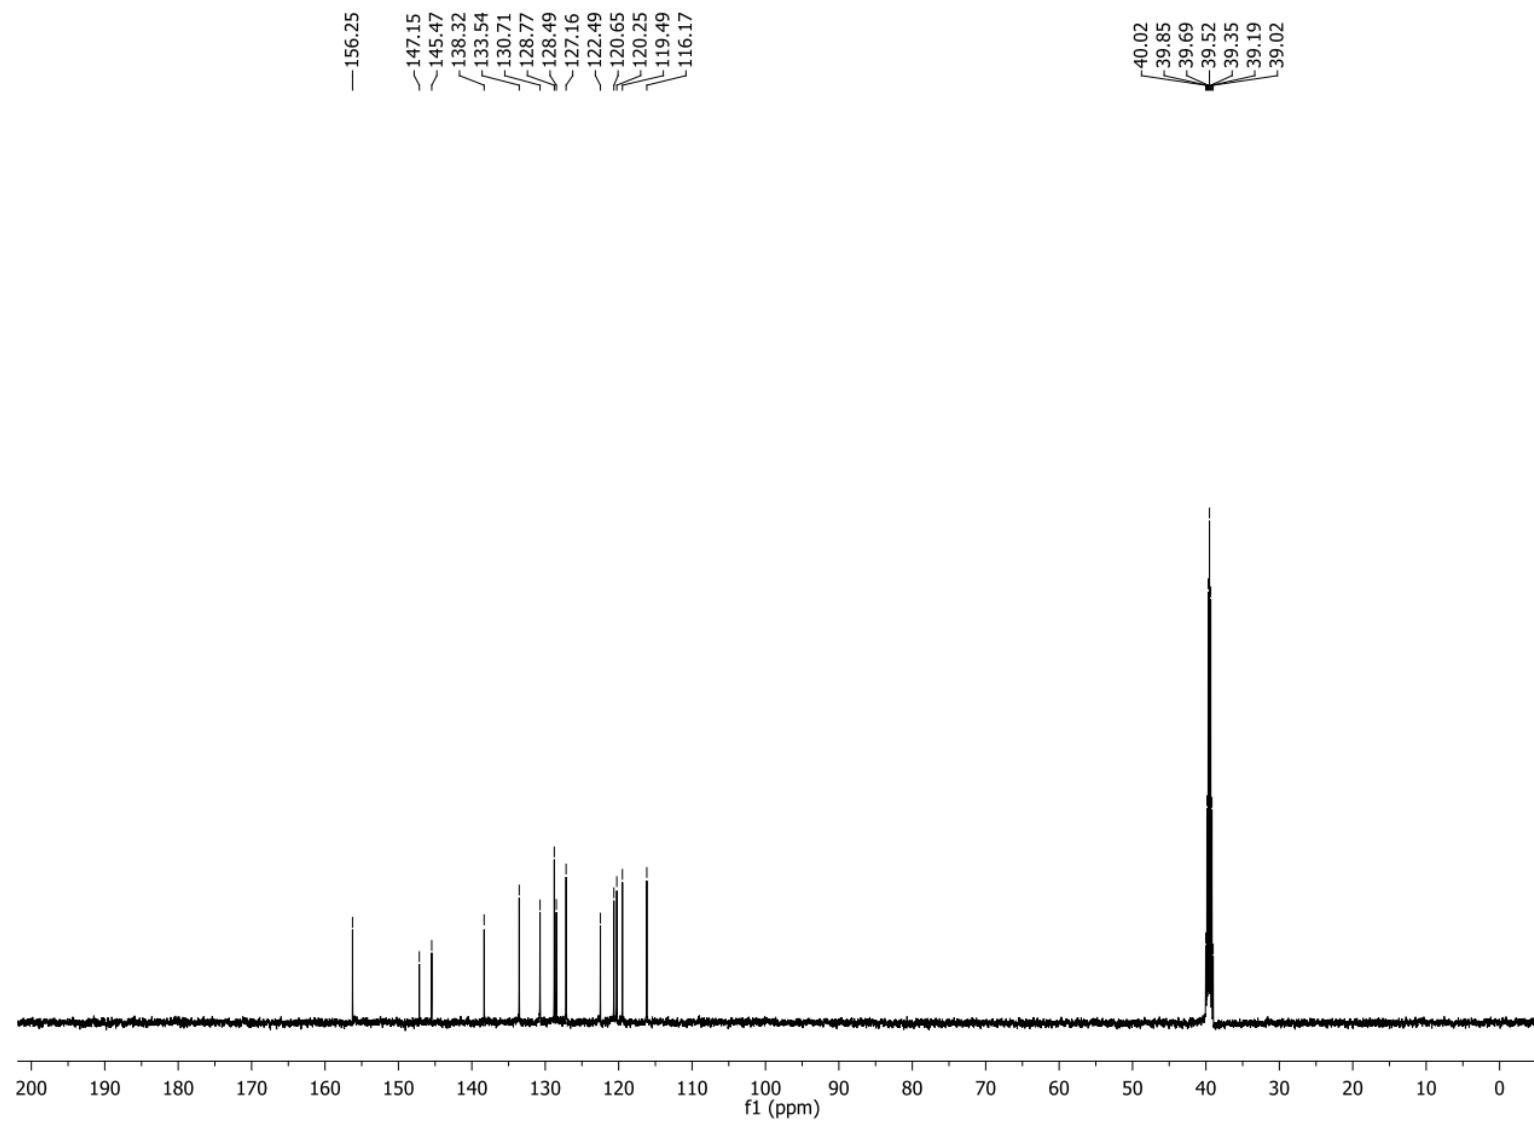

**Figure S2.** The  $^{13}\text{C}$  NMR of *(E)*-2-hydroxy-2',4'-dinitrostilbene (**1a**).

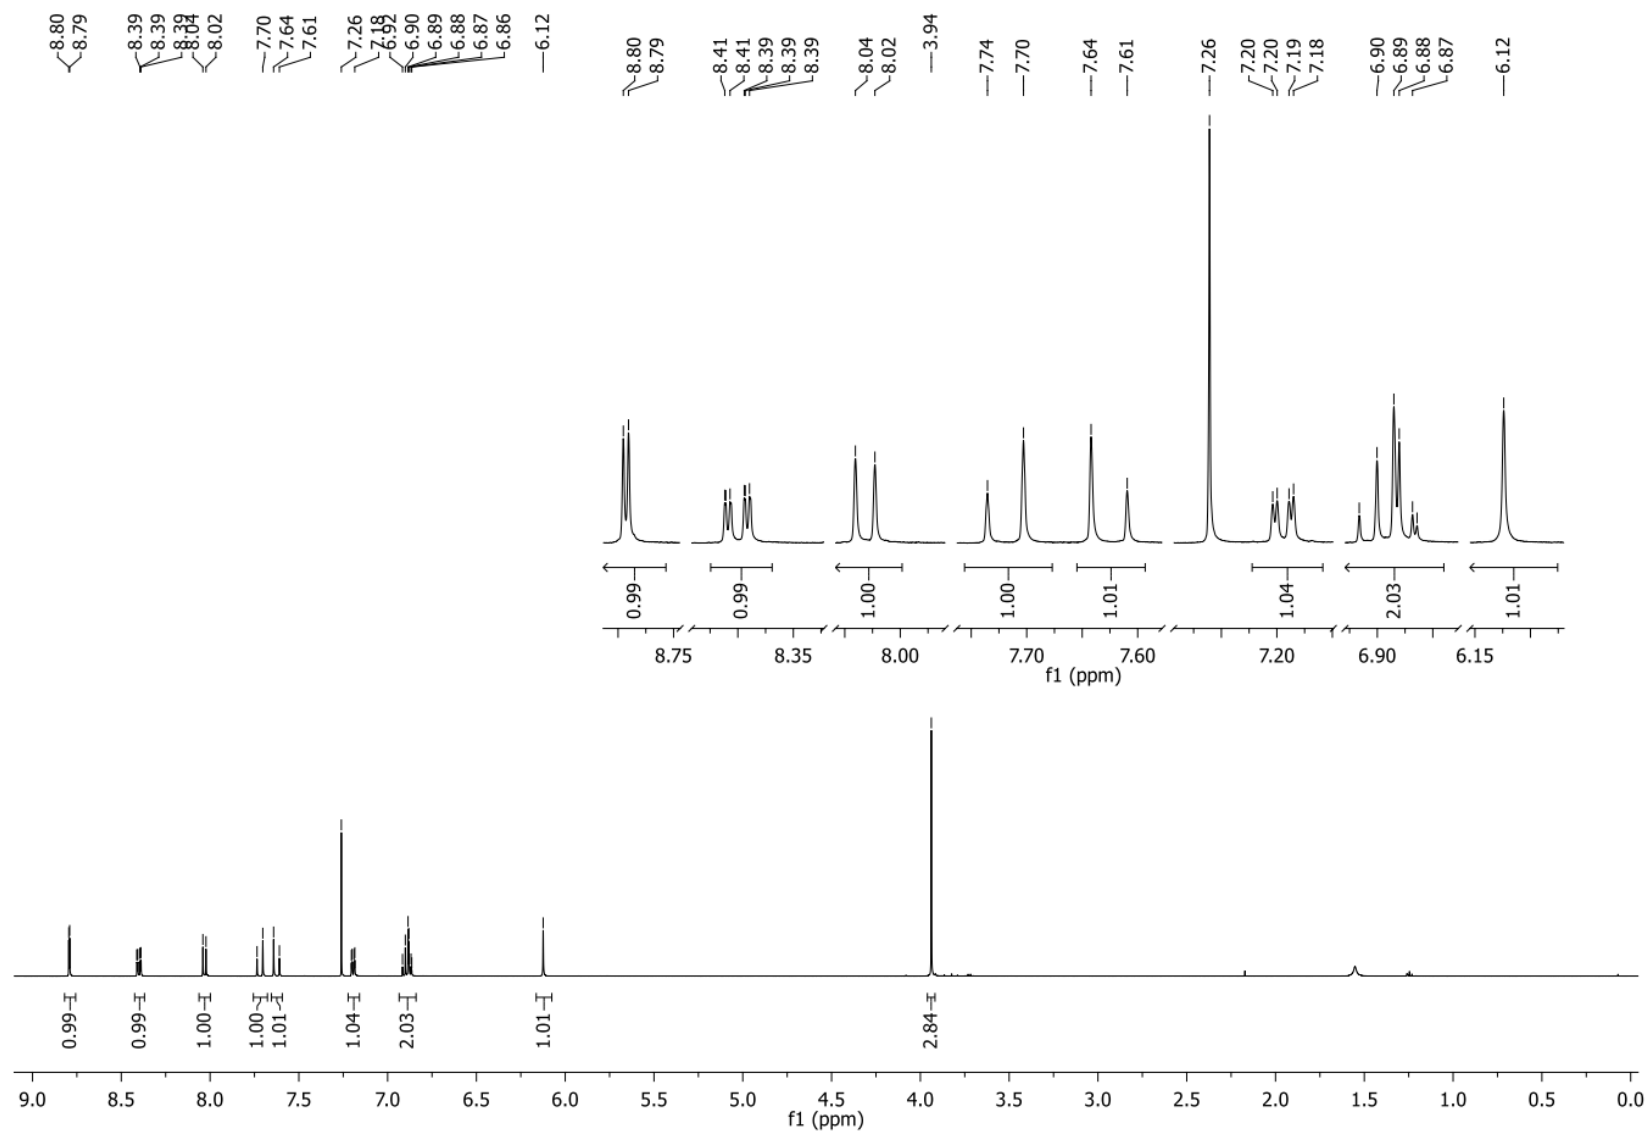

**Figure S3.** The  $^1\text{H}$  NMR of *(E)*-2-hydroxy-3-methoxy-2',4'-dinitrostilbene (**1b**).

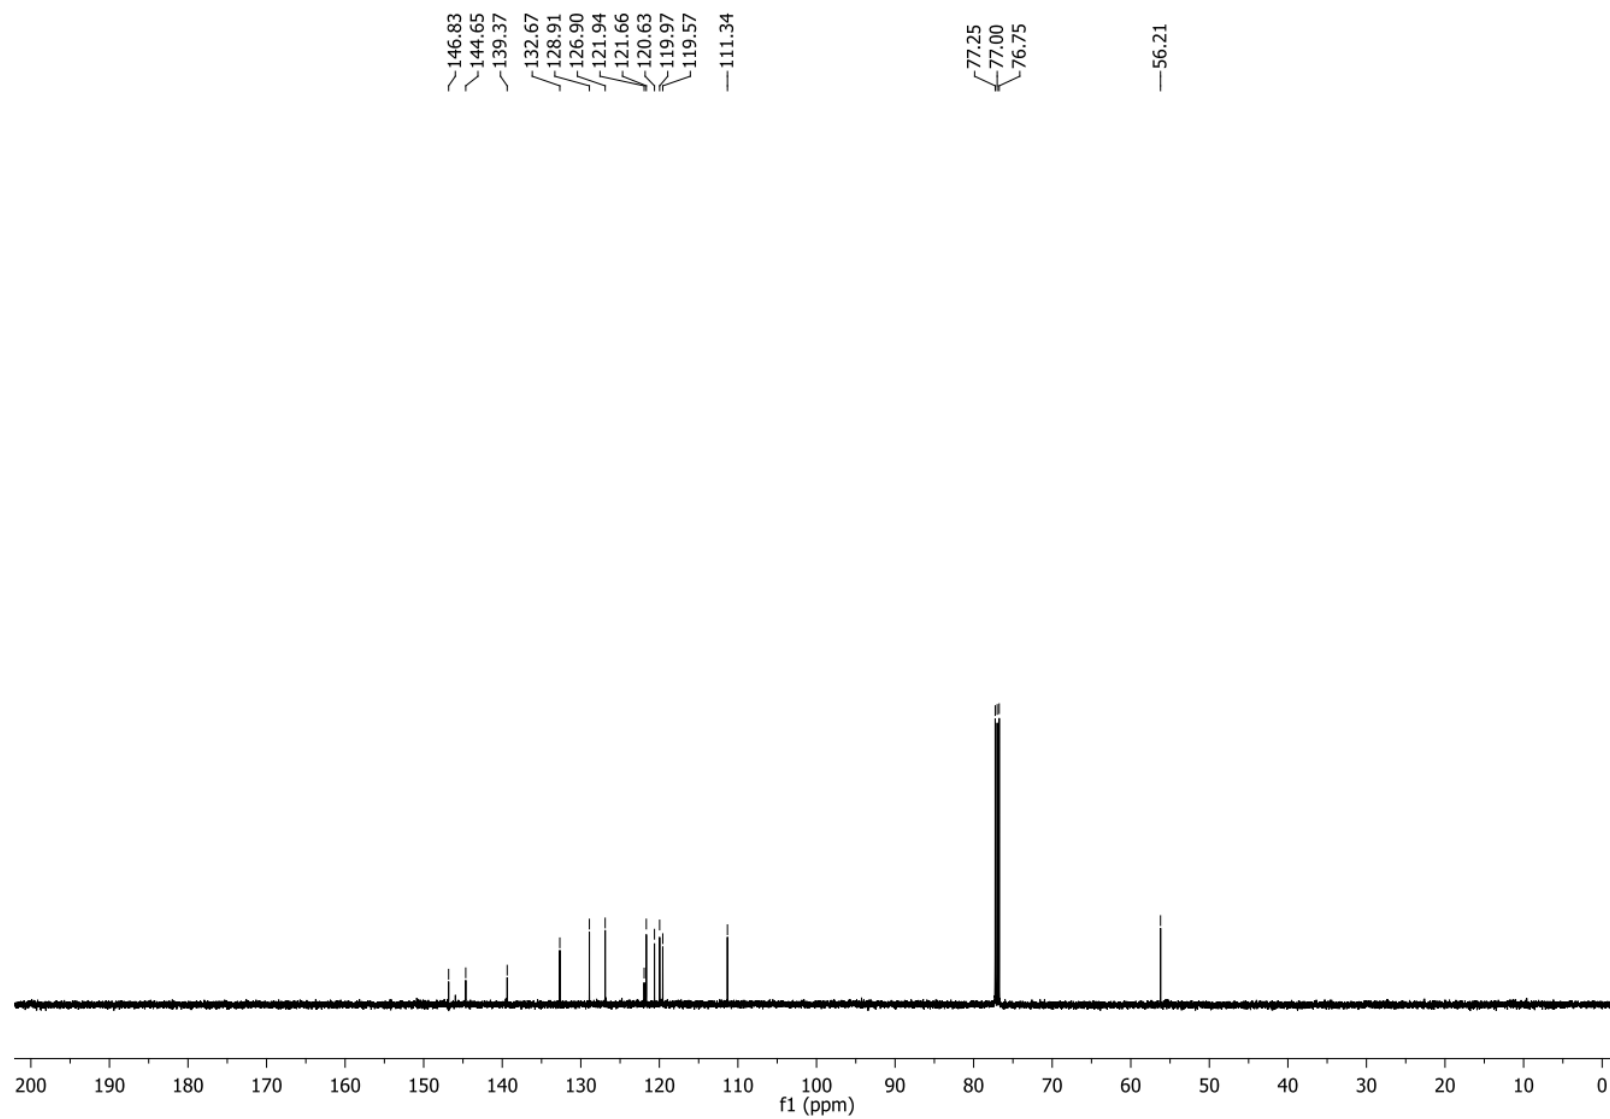

**Figure S4.** The  $^{13}\text{C}$  NMR of (*E*)-2-hydroxy-3-methoxy-2',4'-dinitrostilbene (**1b**).

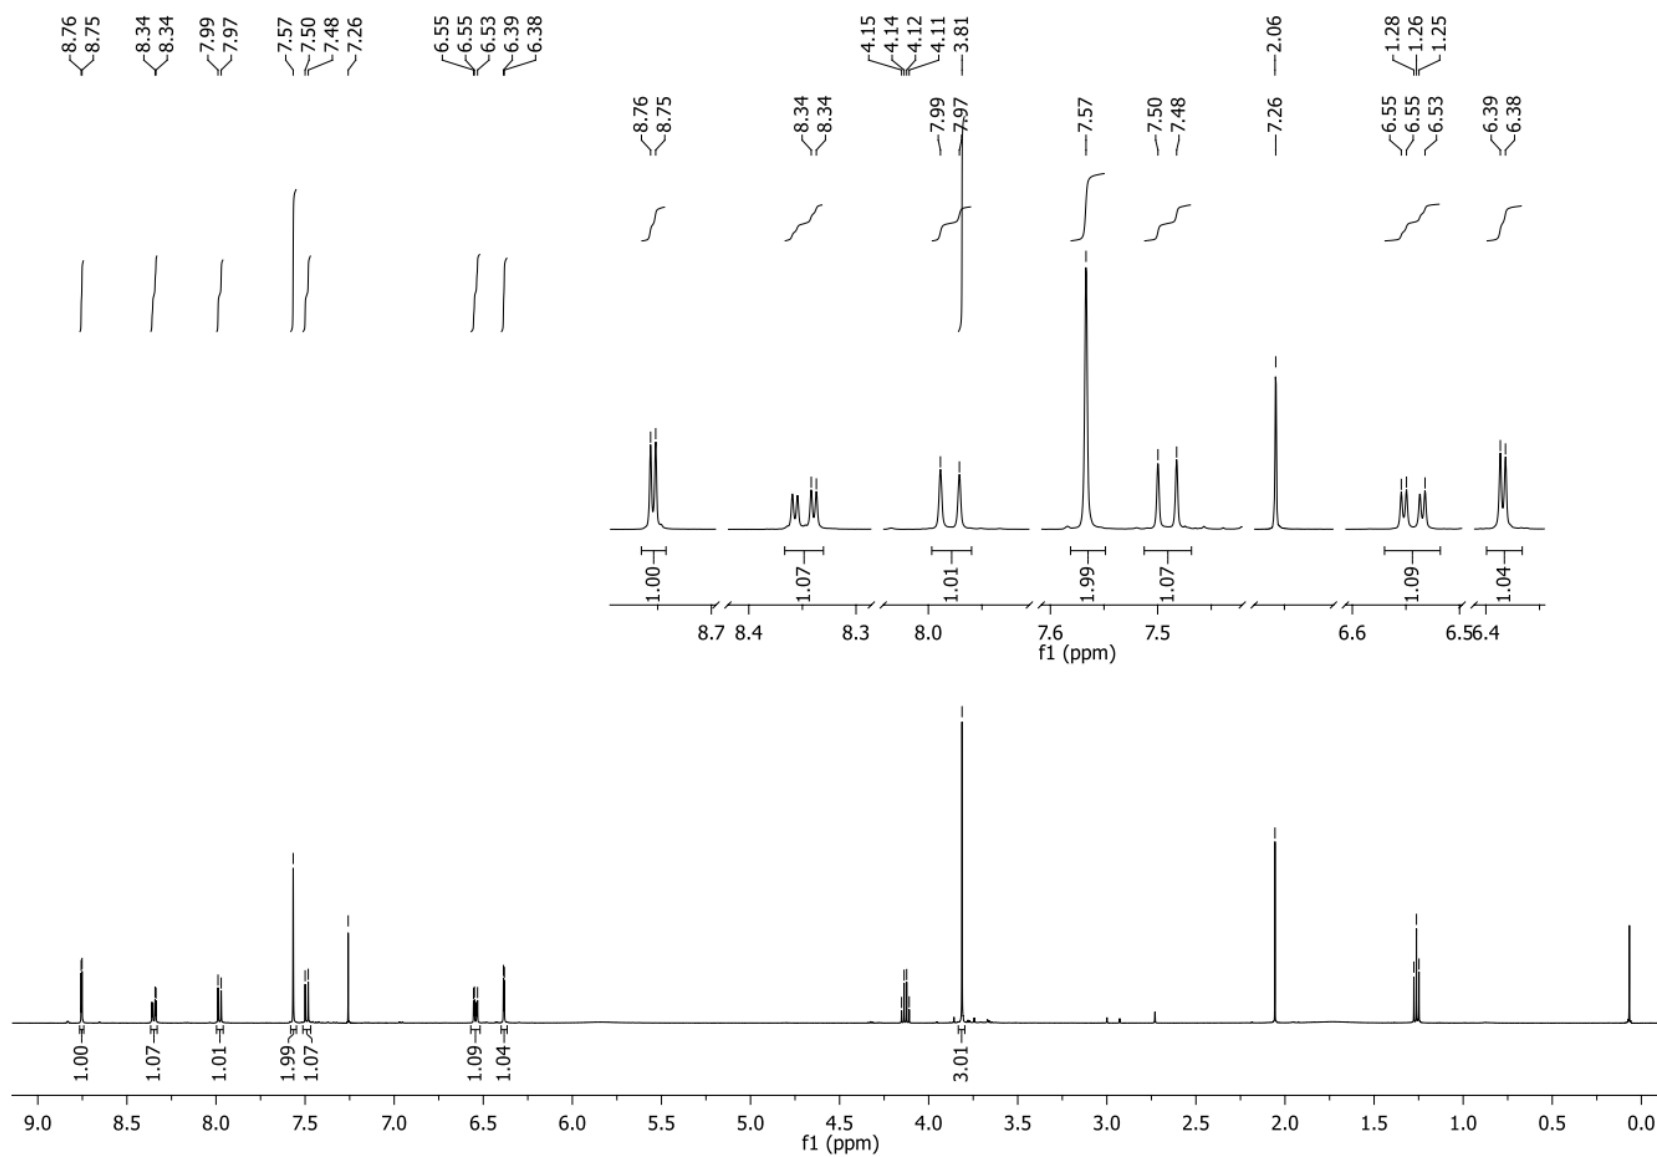

**Figure S5.** The <sup>1</sup>H NMR of (E)-2-hydroxy-4-methoxy-2',4'-dinitrostilbene (1c).

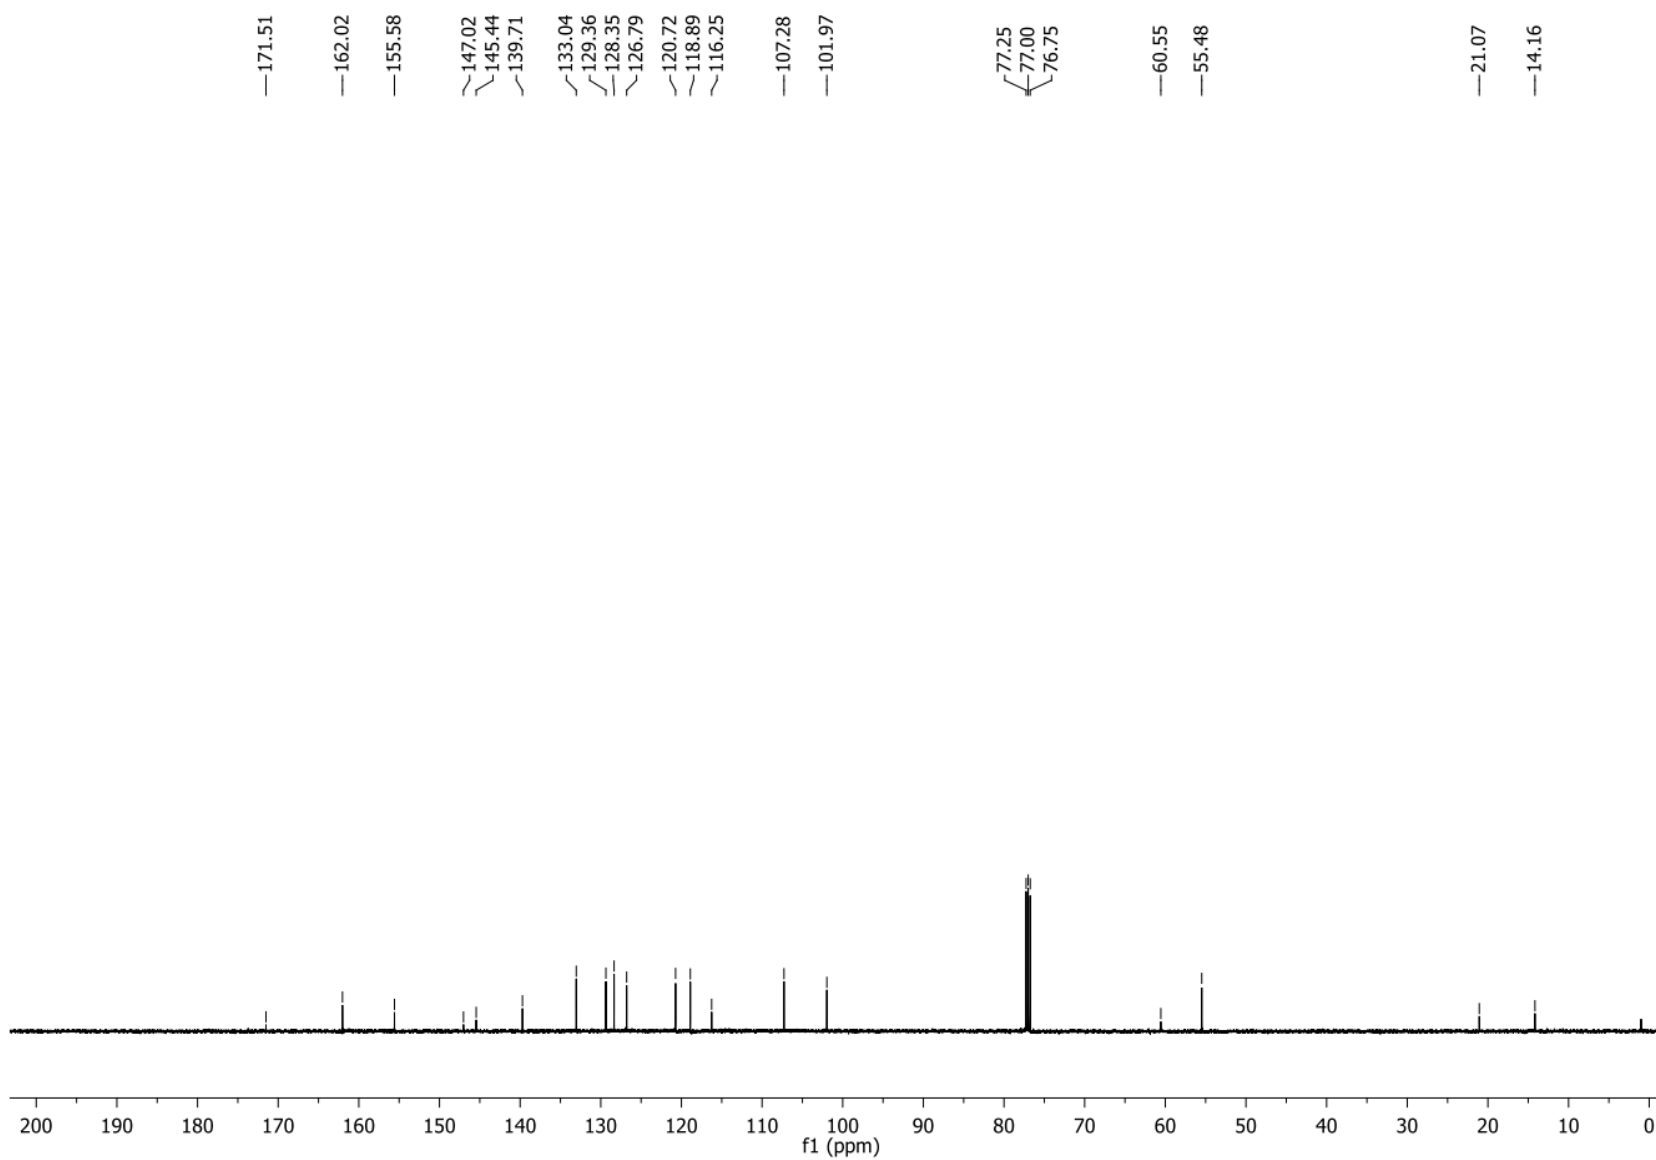

**Figure S6.** The <sup>13</sup>C NMR of (*E*)-2-hydroxy-4-methoxy-2',4'-dinitrostilbene (**1c**).

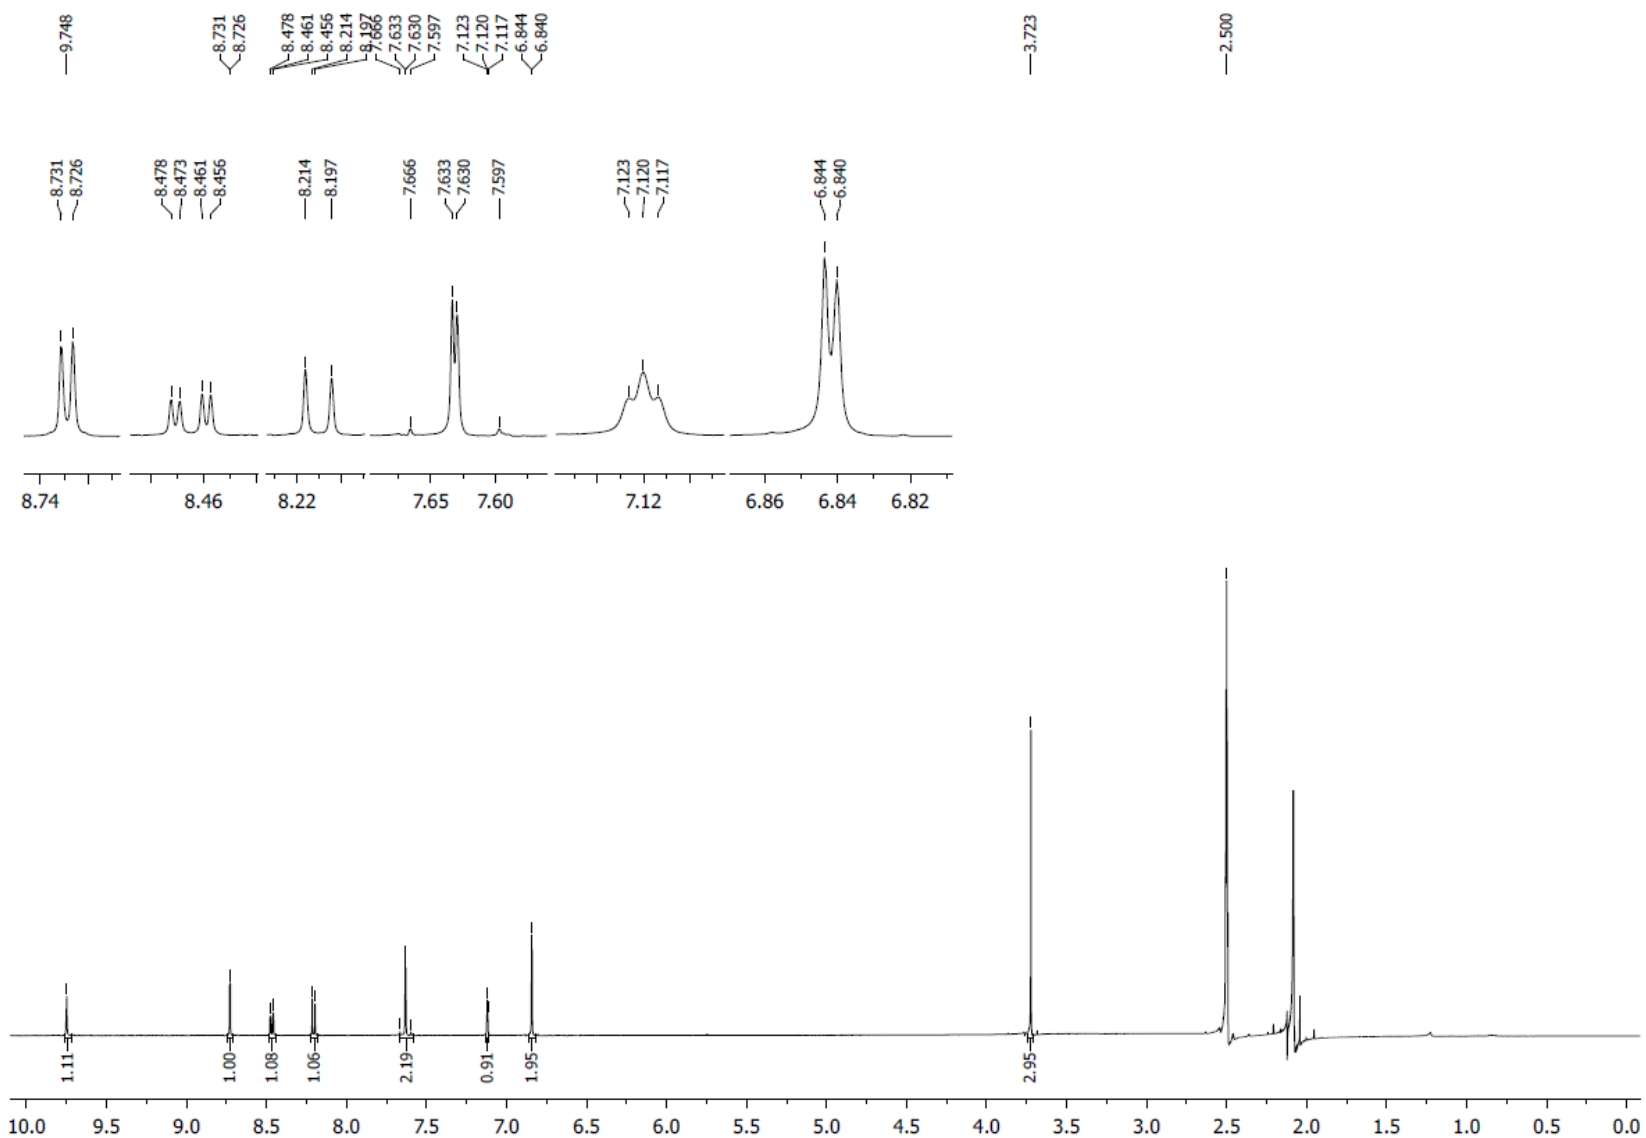

**Figure S7.** The  $^1\text{H}$  NMR of *(E)*-2-hydroxy-5-methoxy-2',4'-dinitrostilbene (**1d**).



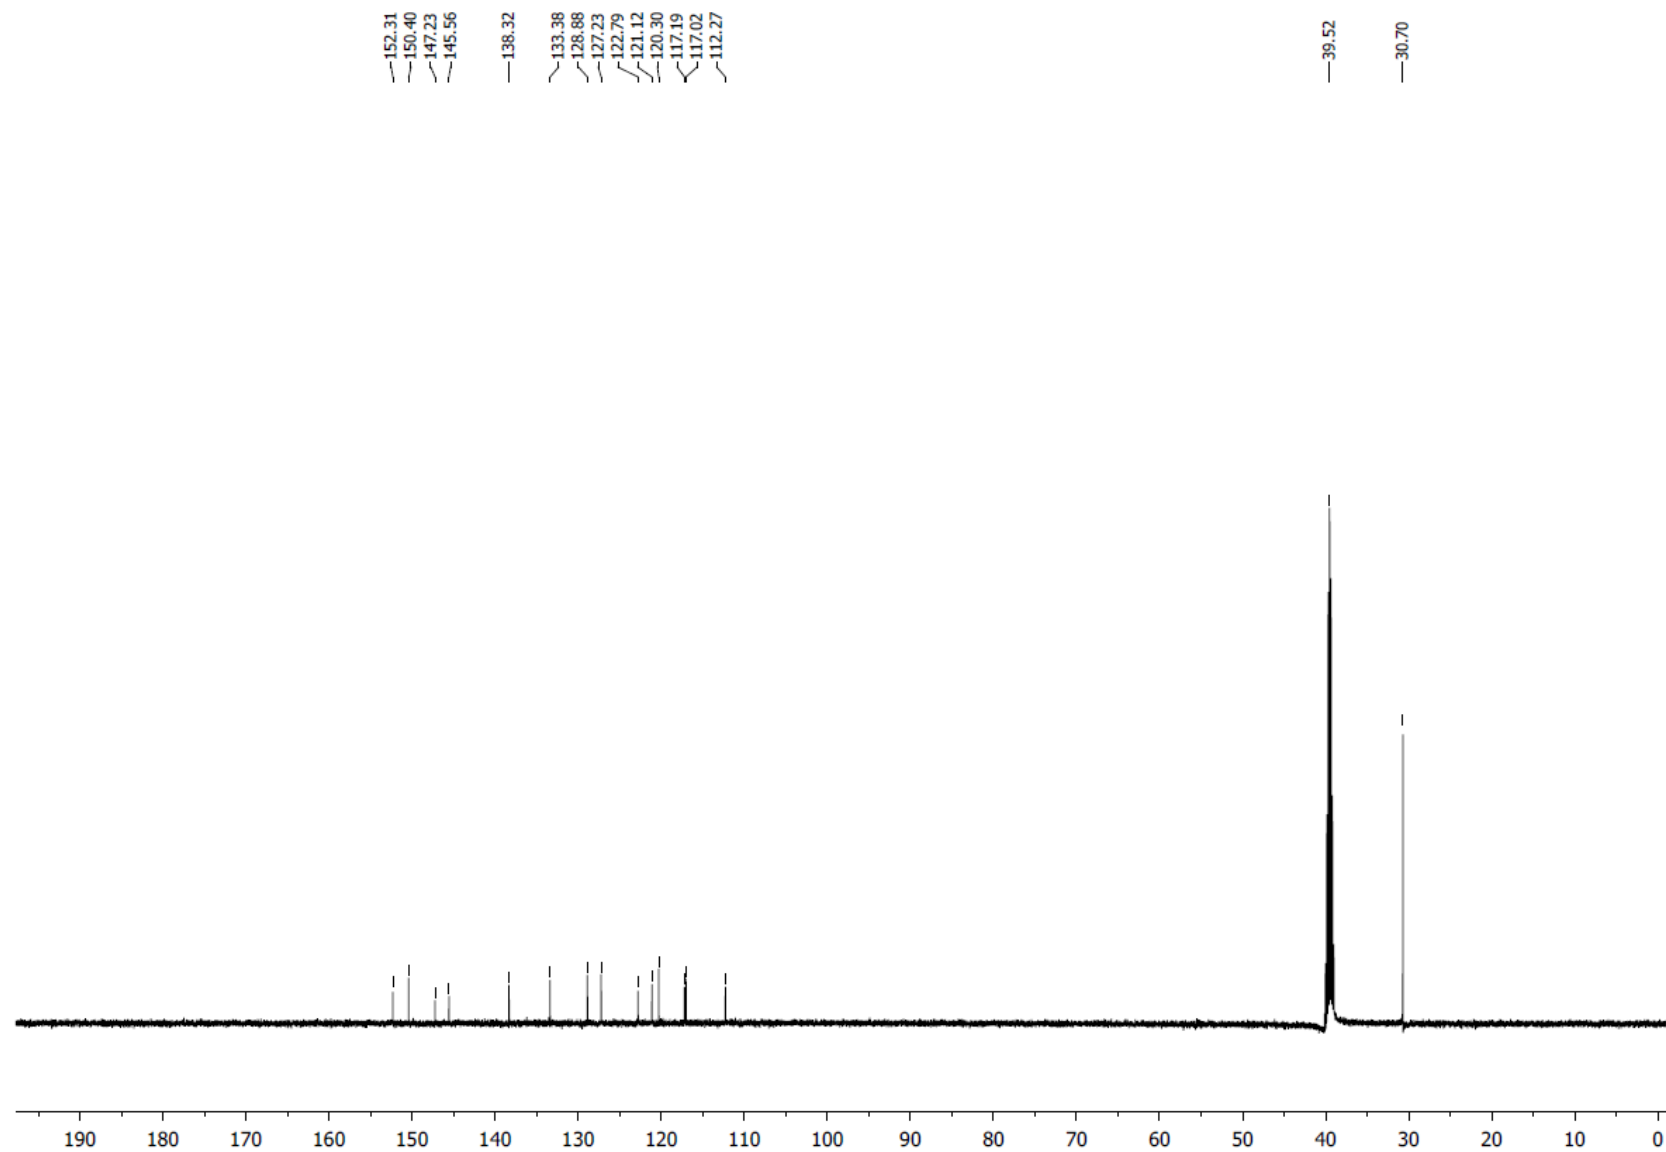

**Figure S8.** The  $^{13}\text{C}$  NMR of *(E)*-2-hydroxy-5-methoxy-2',4'-dinitrostilbene (**1d**).

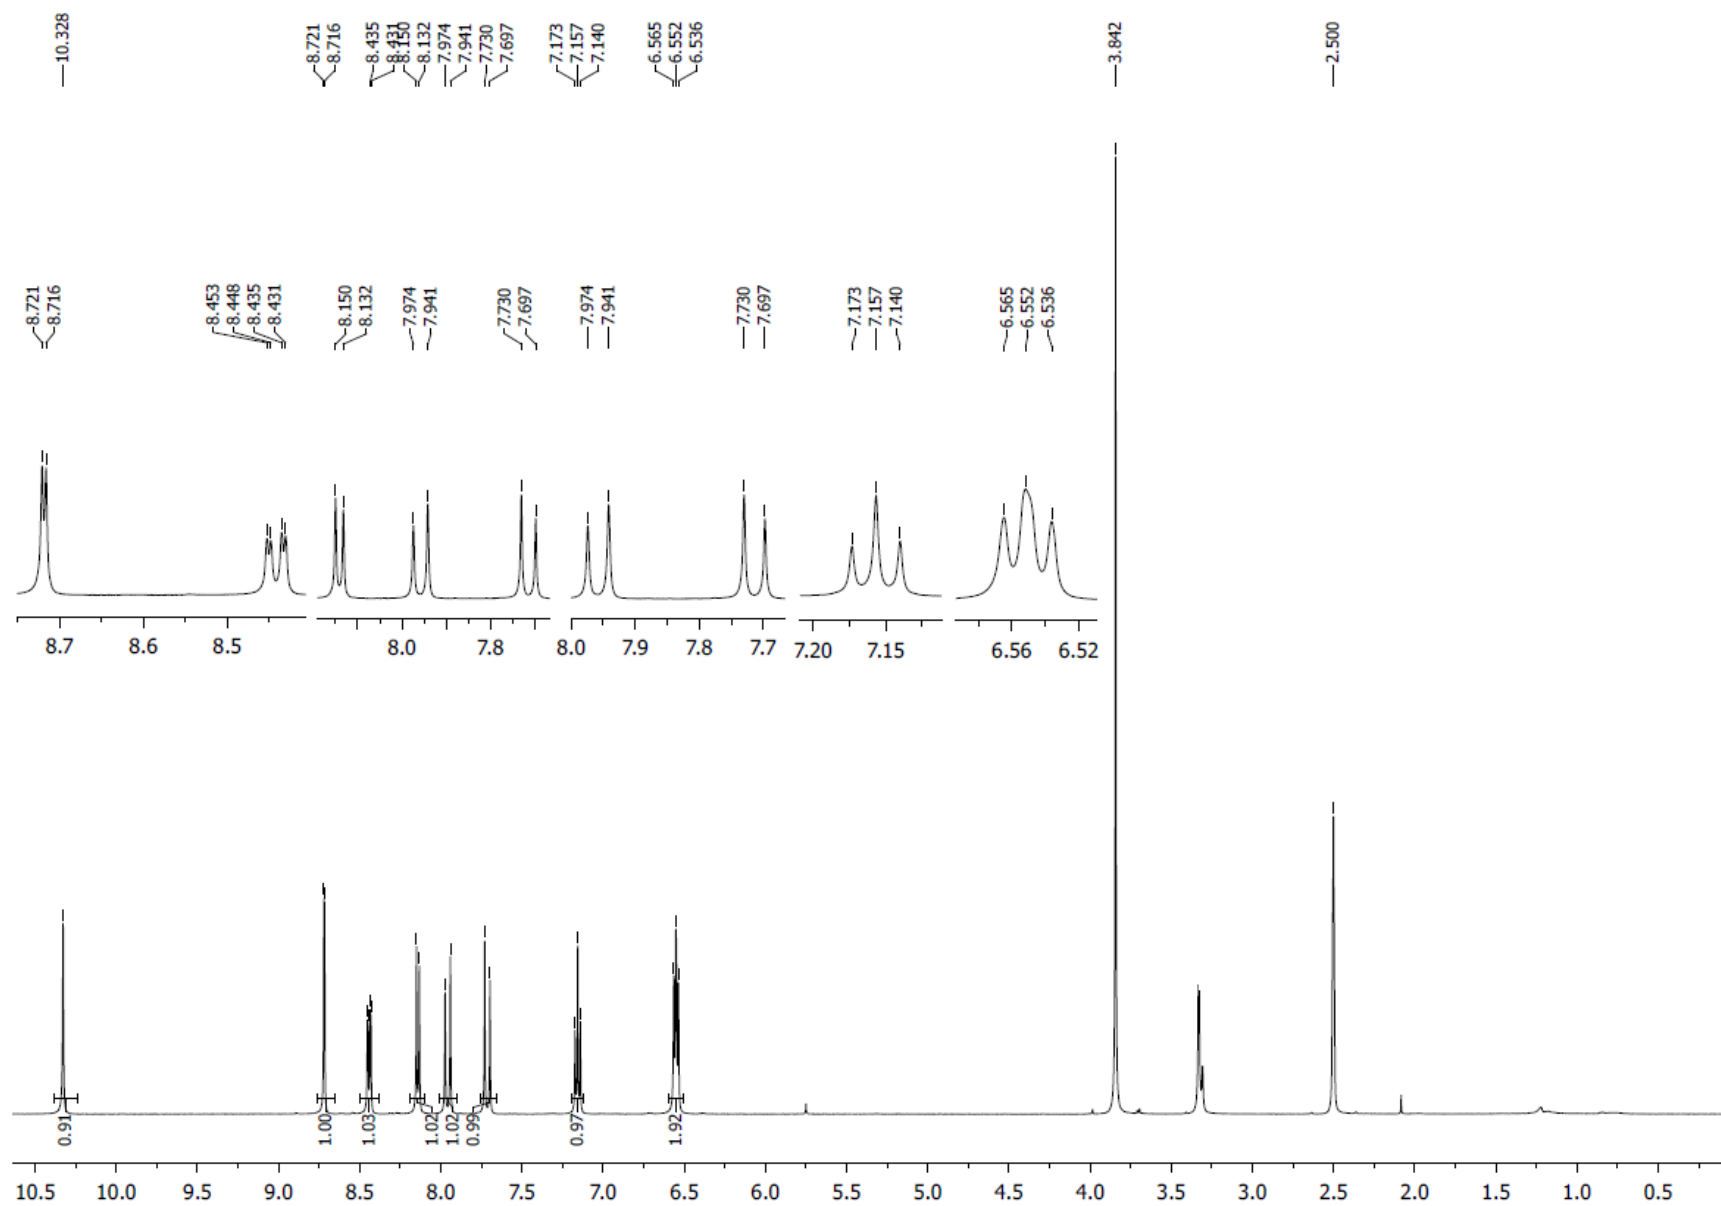

**Figure S9.** The  $^1\text{H}$  NMR of *(E)*-2-hydroxy-6-methoxy-2',4'-dinitrostilbene (**1e**).

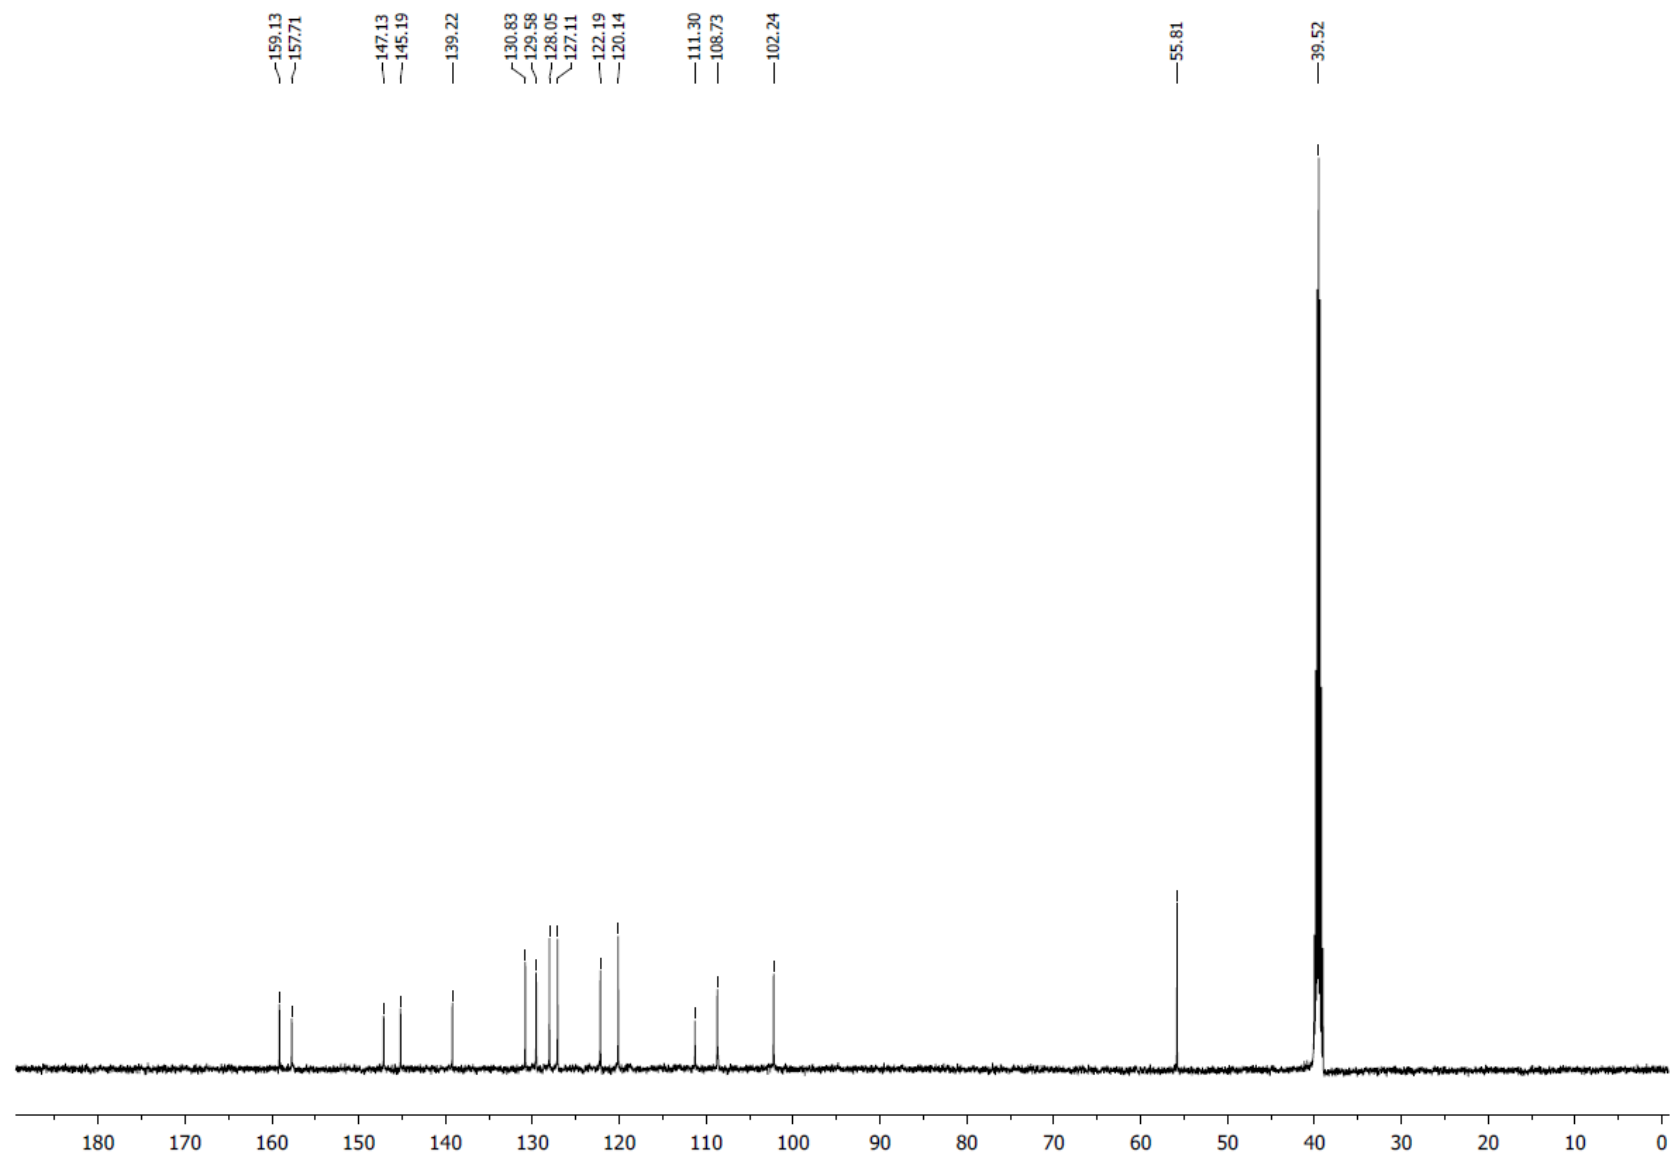

**Figure S10.** The <sup>13</sup>C NMR of (*E*)-2-hydroxy-6-methoxy-2',4'-dinitrostilbene (**1e**).

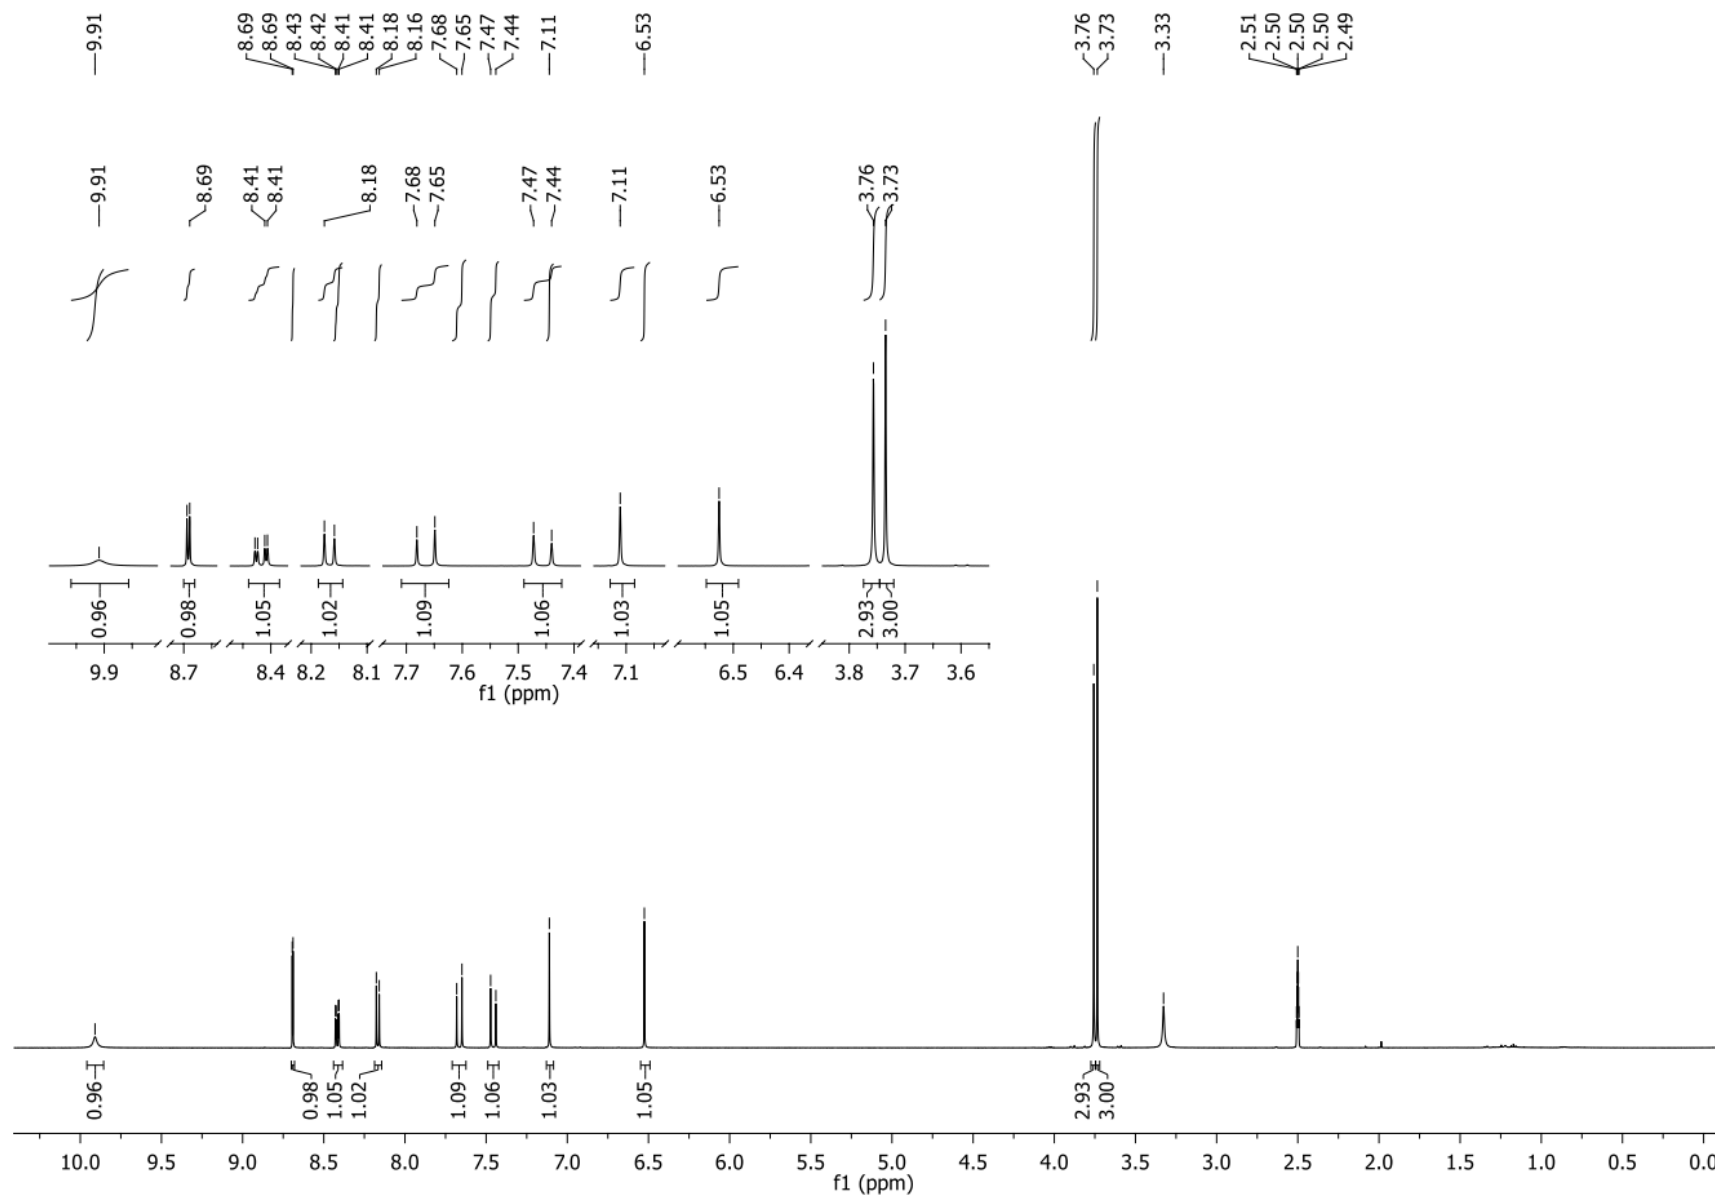

**Figure S11.** The  $^1\text{H}$  NMR of *(E)*-2-hydroxy-4,5-dimethoxy-2',4'-dinitrostilbene (**1f**).

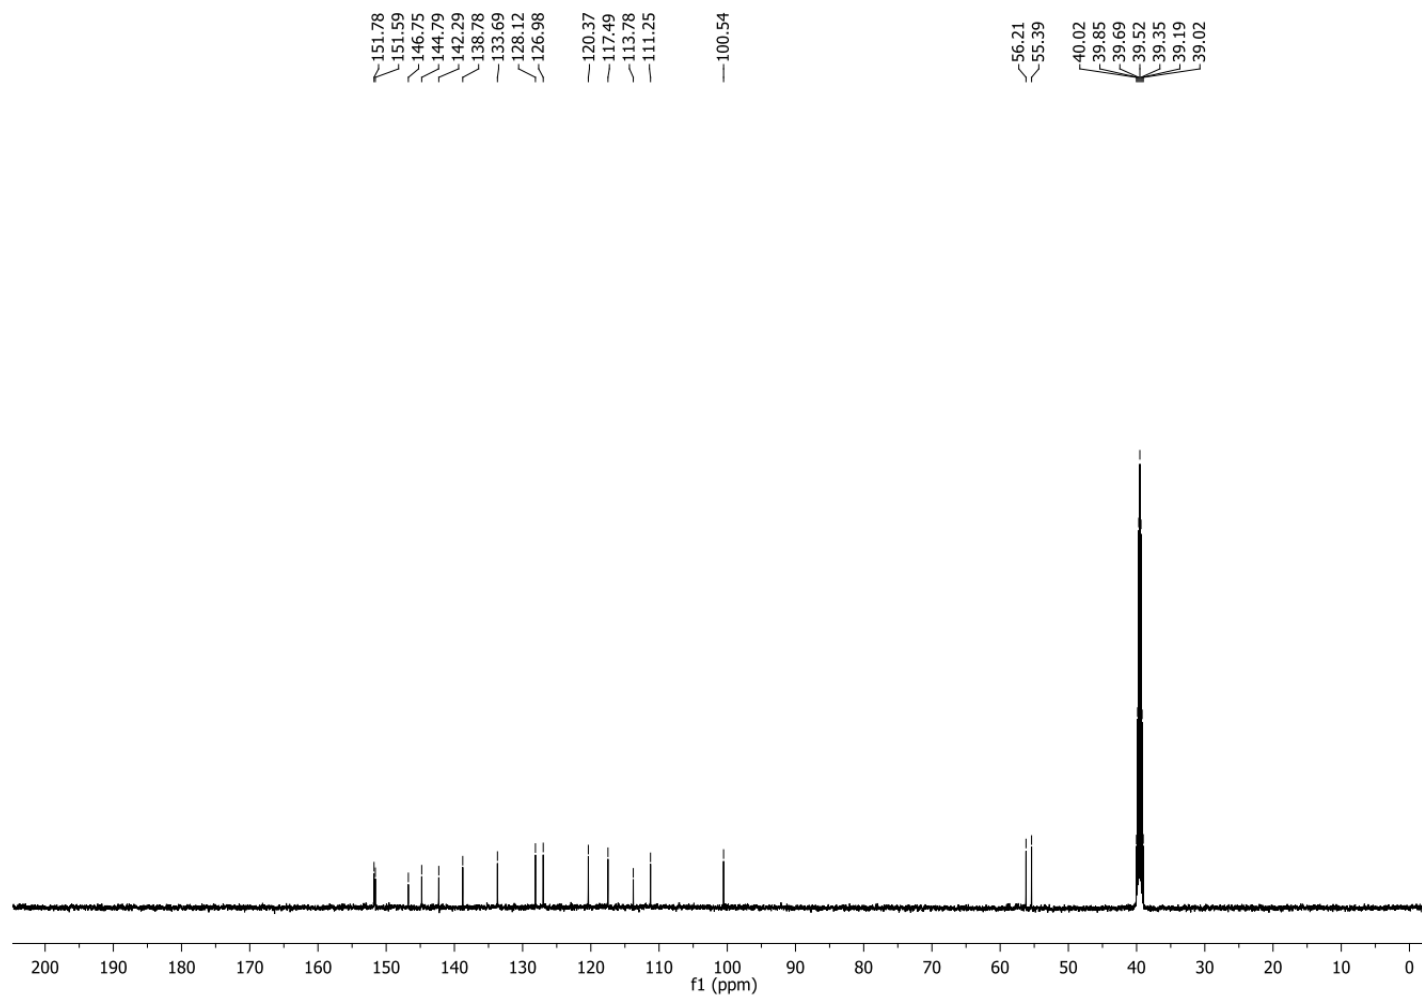

**Figure S12.** The  $^{13}\text{C}$  NMR of (E)- 2-hydroxy-4,5-dimethoxy-2',4'-dinitrostilbene (**1f**).

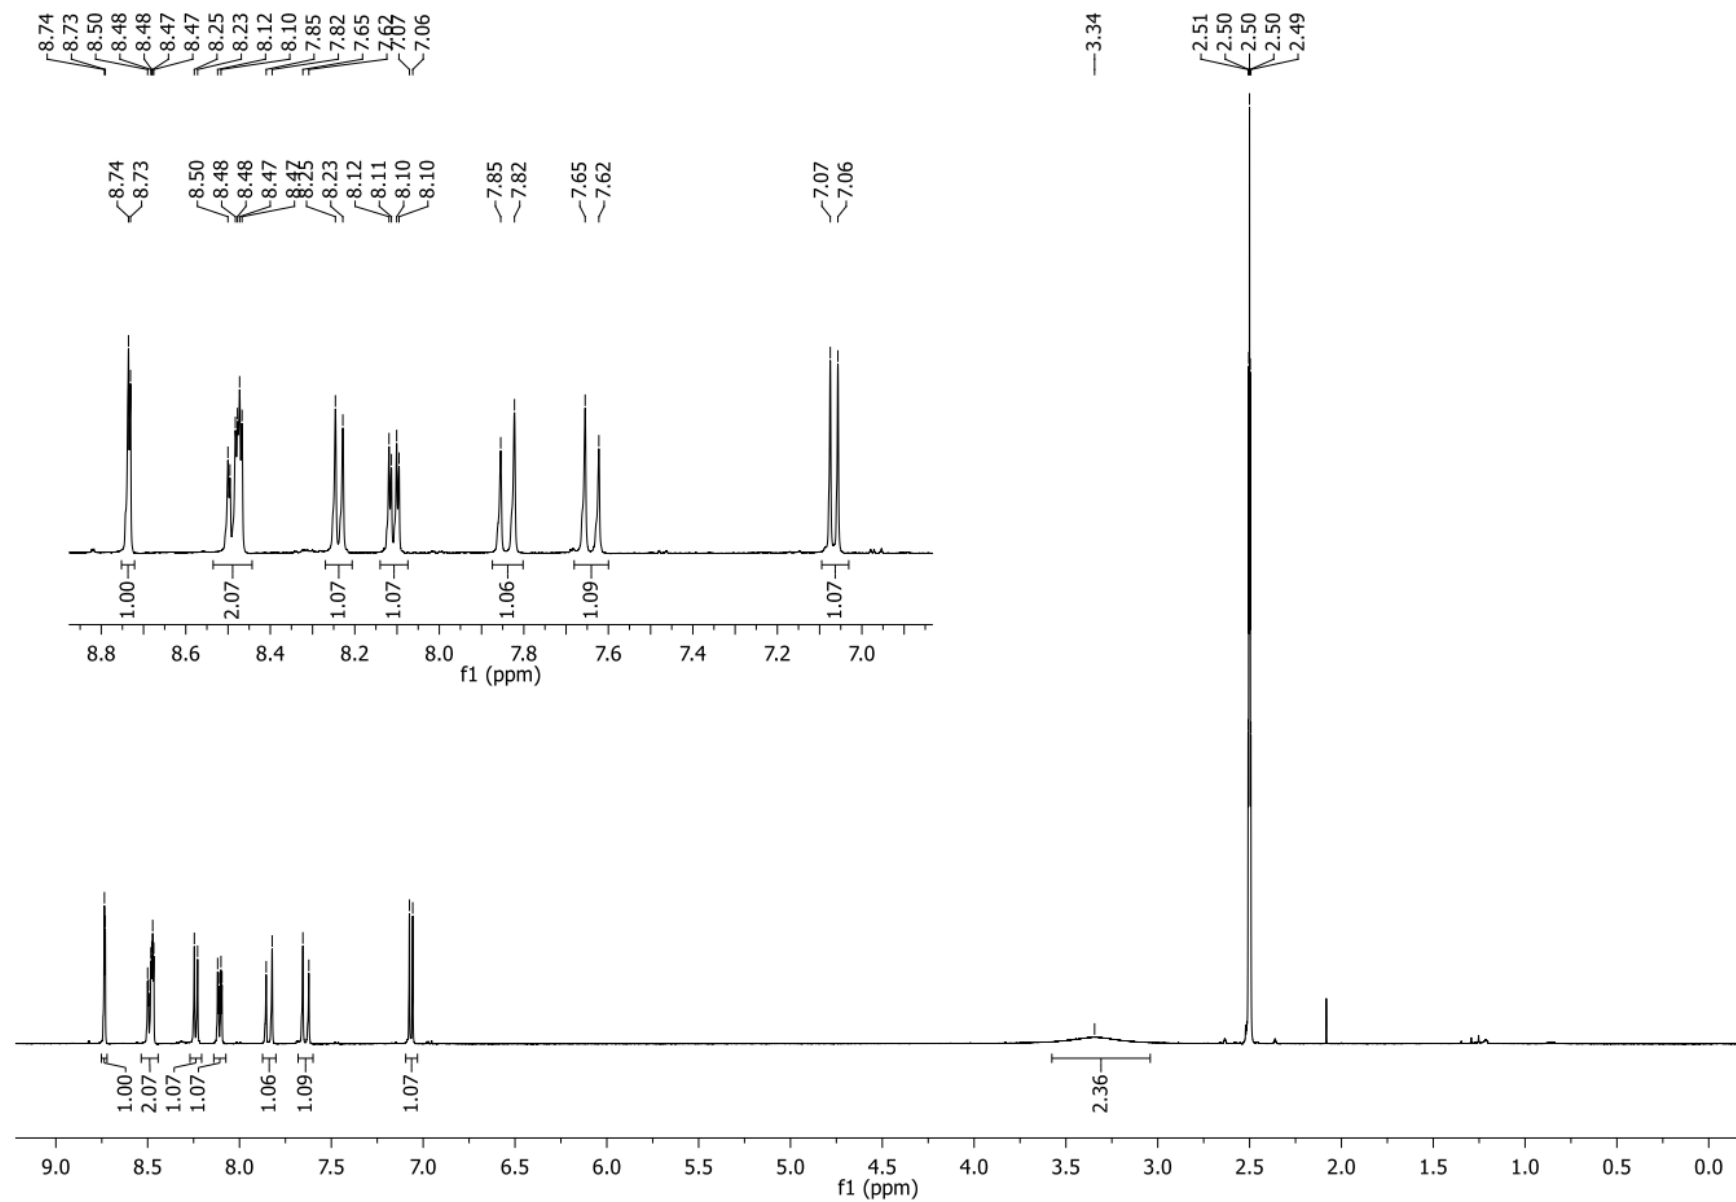

**Figure S13.** The  $^1\text{H}$  NMR of *(E)*-2-hydroxy-5,2',4' trinitrostilbene (**1g**).

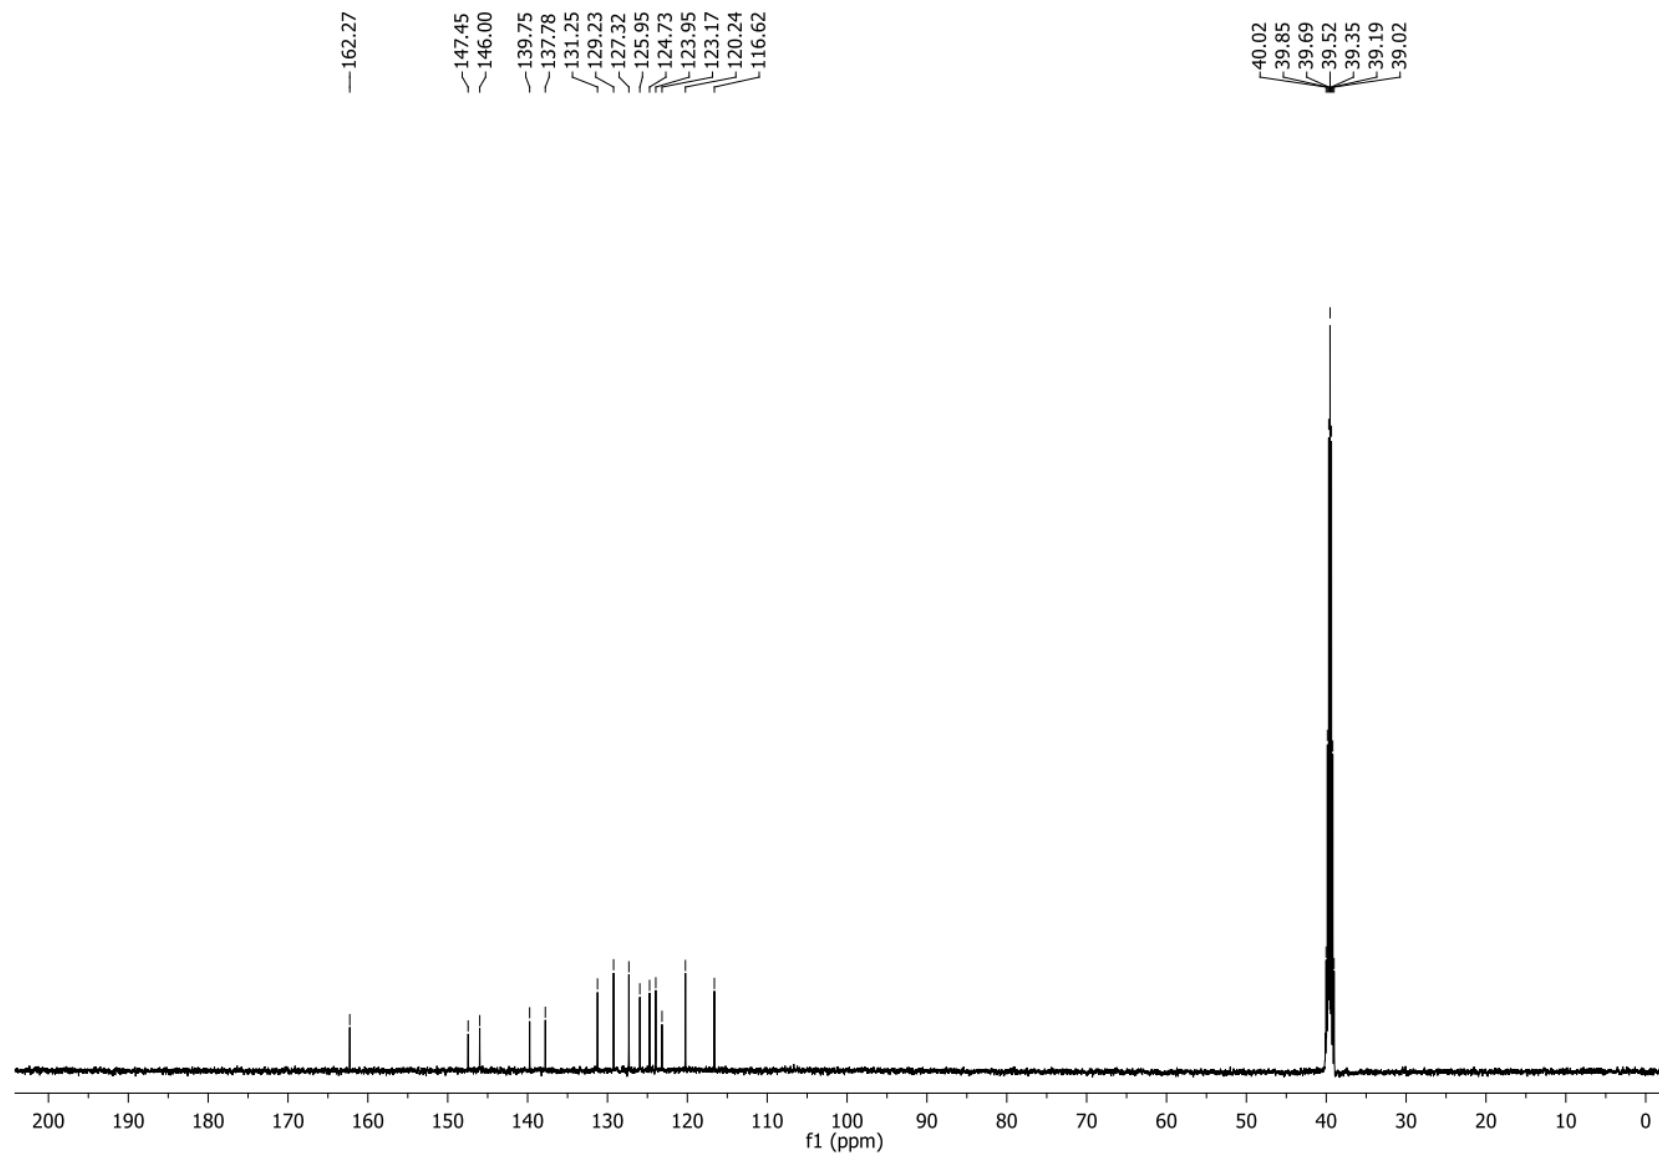

**Figure S14.** The <sup>13</sup>C NMR of (*E*)-2-hydroxy-5,2',4' trinitrostilbene (**1g**).

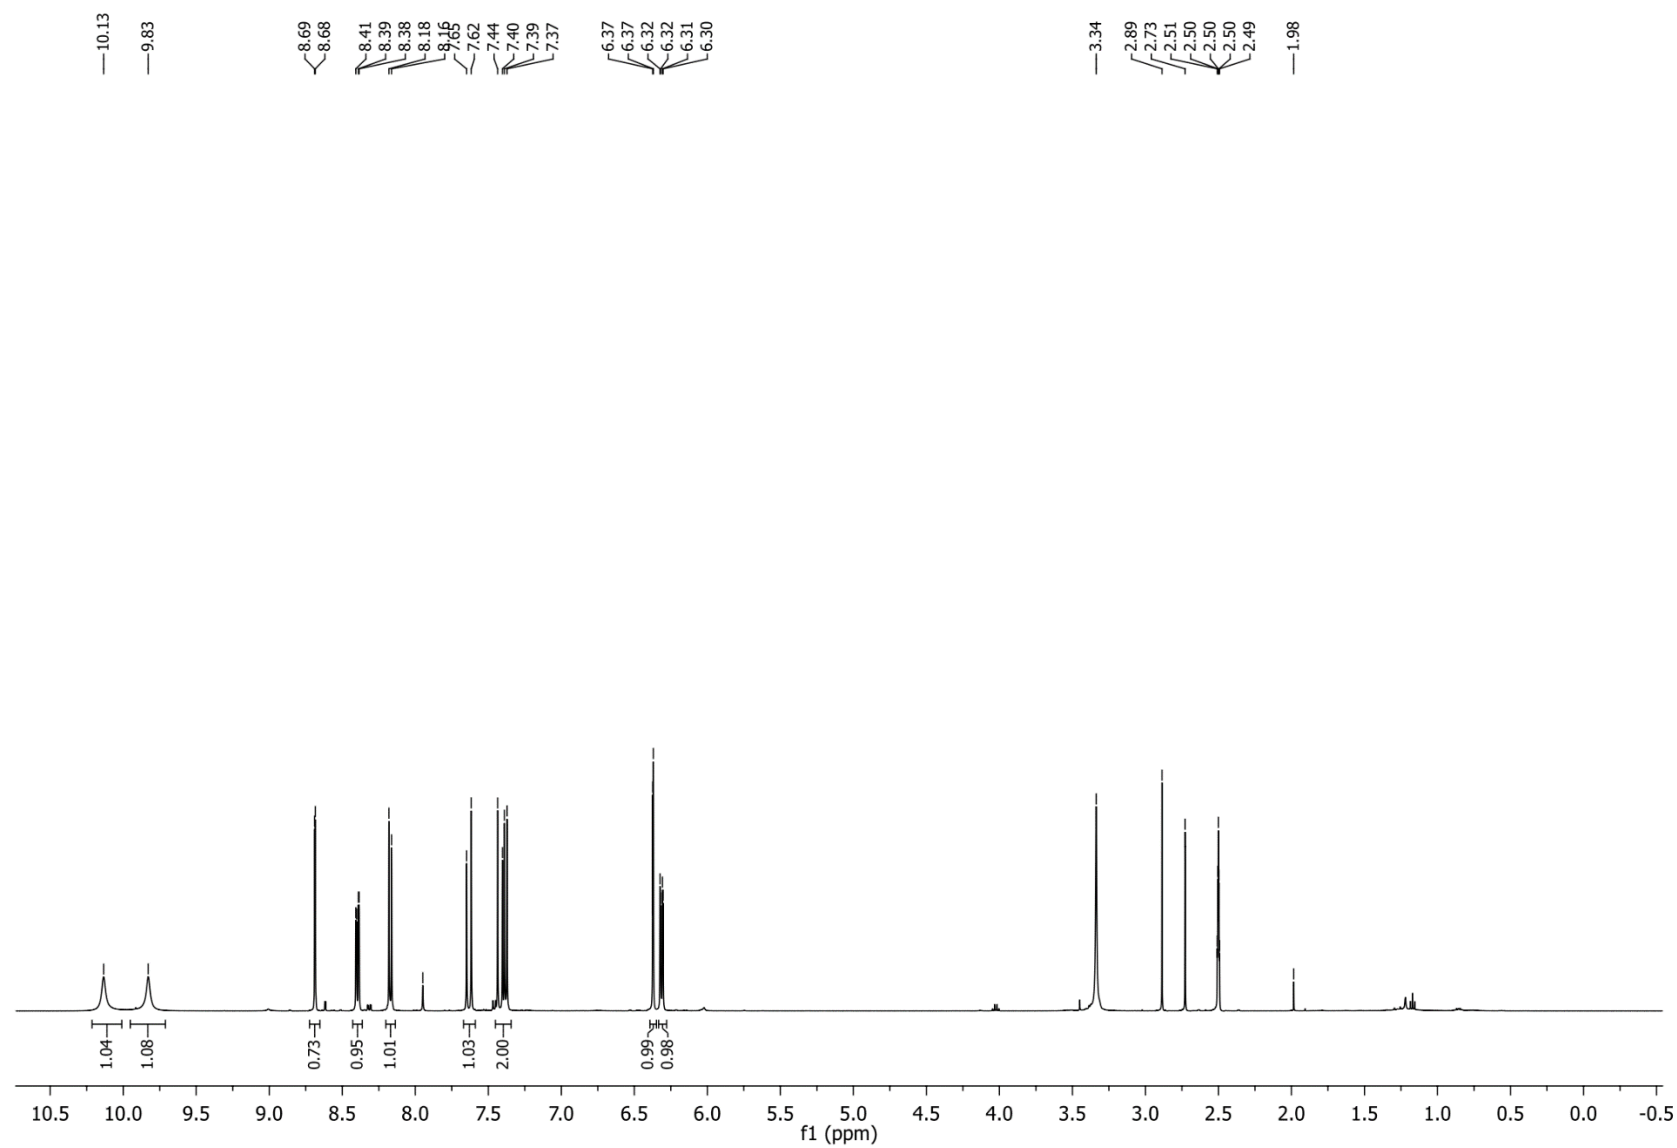

**Figure S15.** The  $^1\text{H}$  NMR of *(E)*-2,4-dihydroxy-2',4'-dinitrostilbene (**1i**).



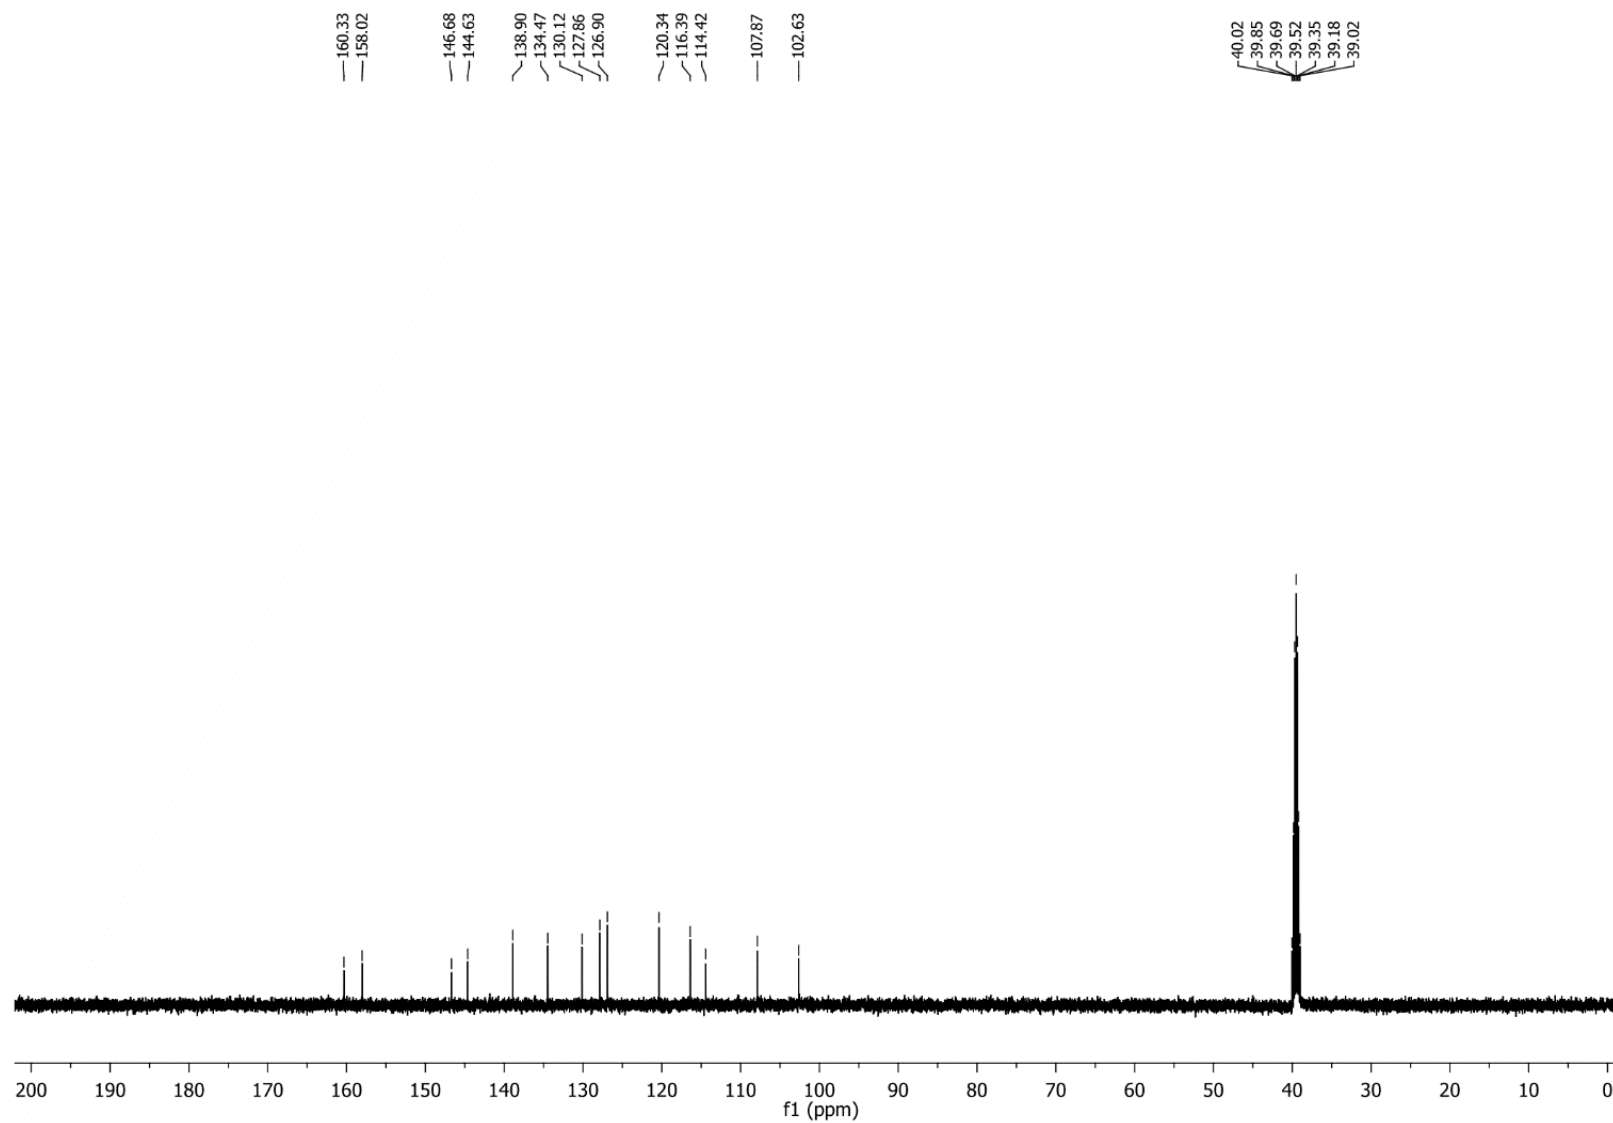

**Figure S16.** The <sup>13</sup>C NMR of (*E*)- 2,4-dihydroxy-2',4'-dinitrostilbene (**1i**).

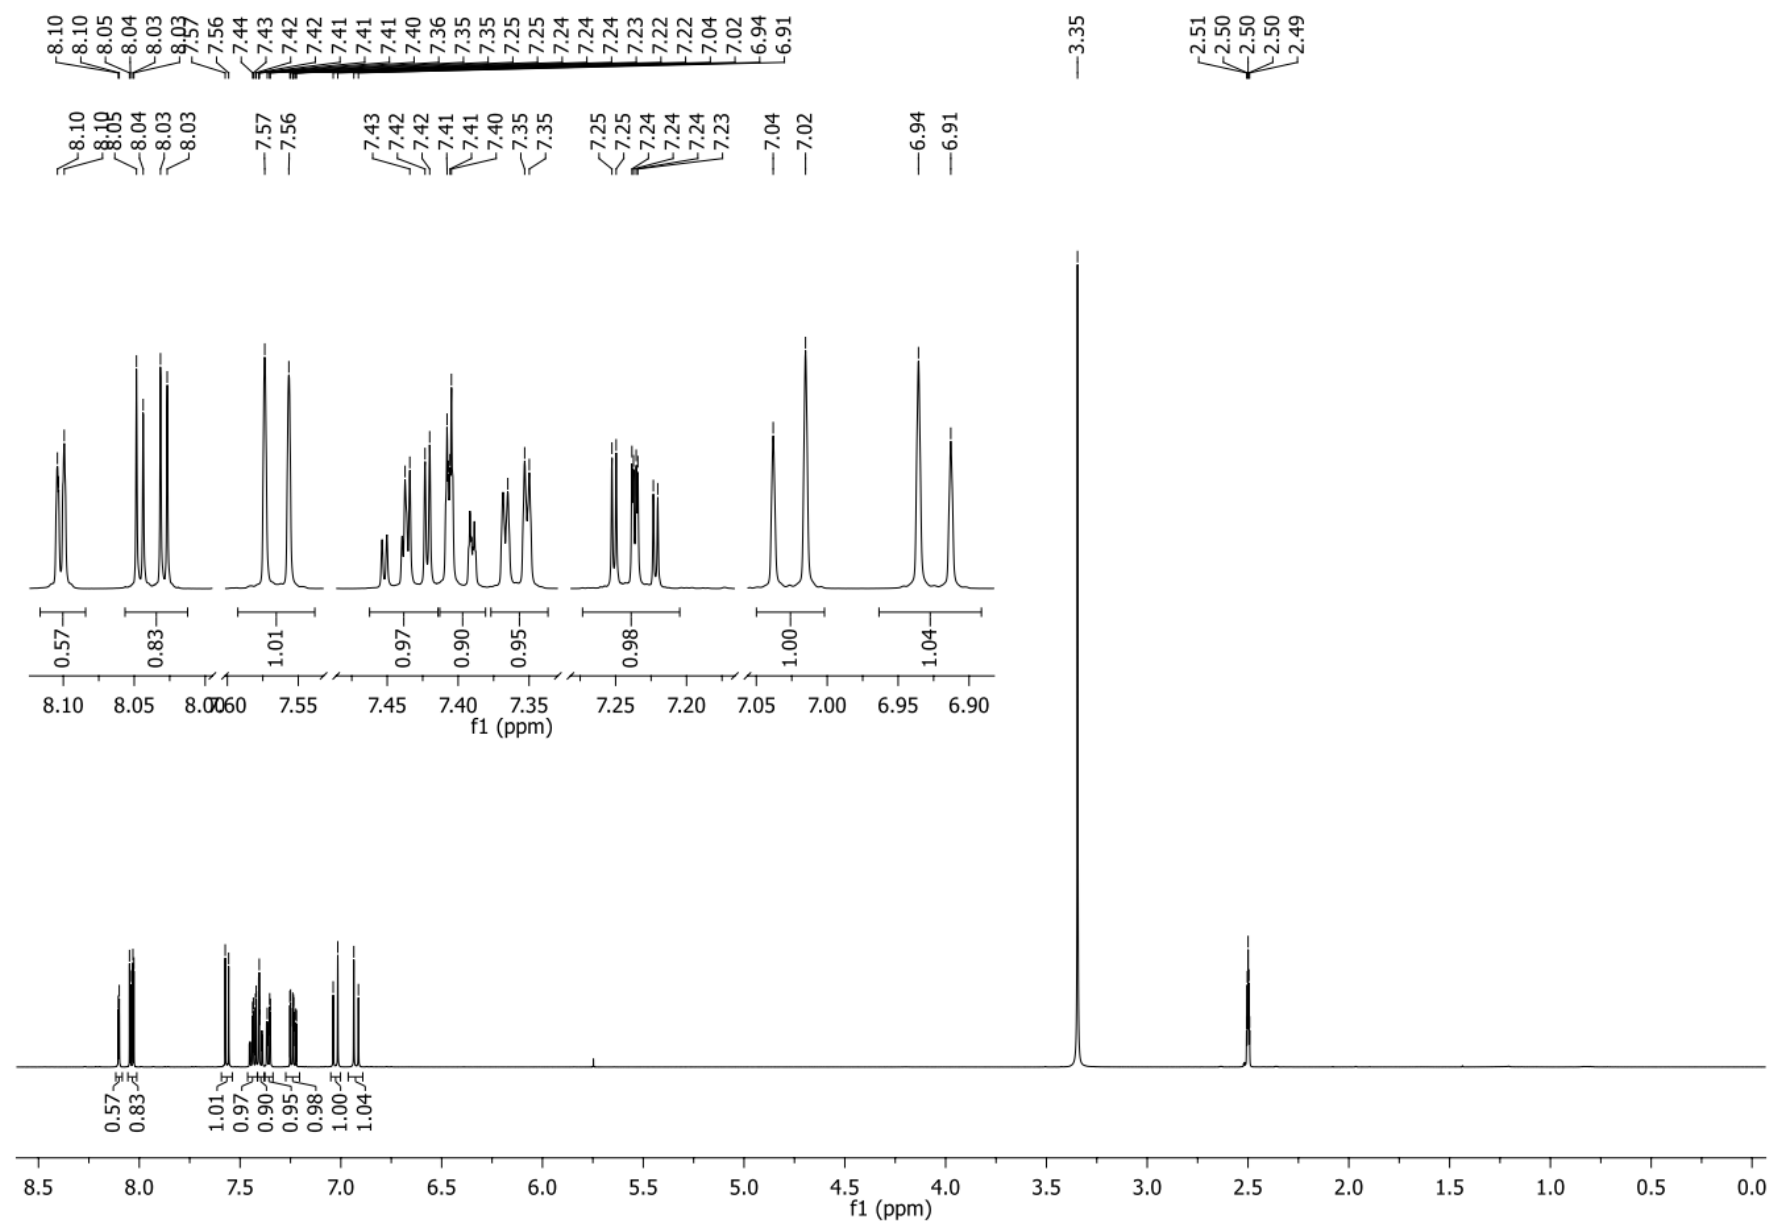

**Figure S17.** The  $^1\text{H}$  NMR of 3-nitrodibenzo[*b,f*]oxepine (**2a**).

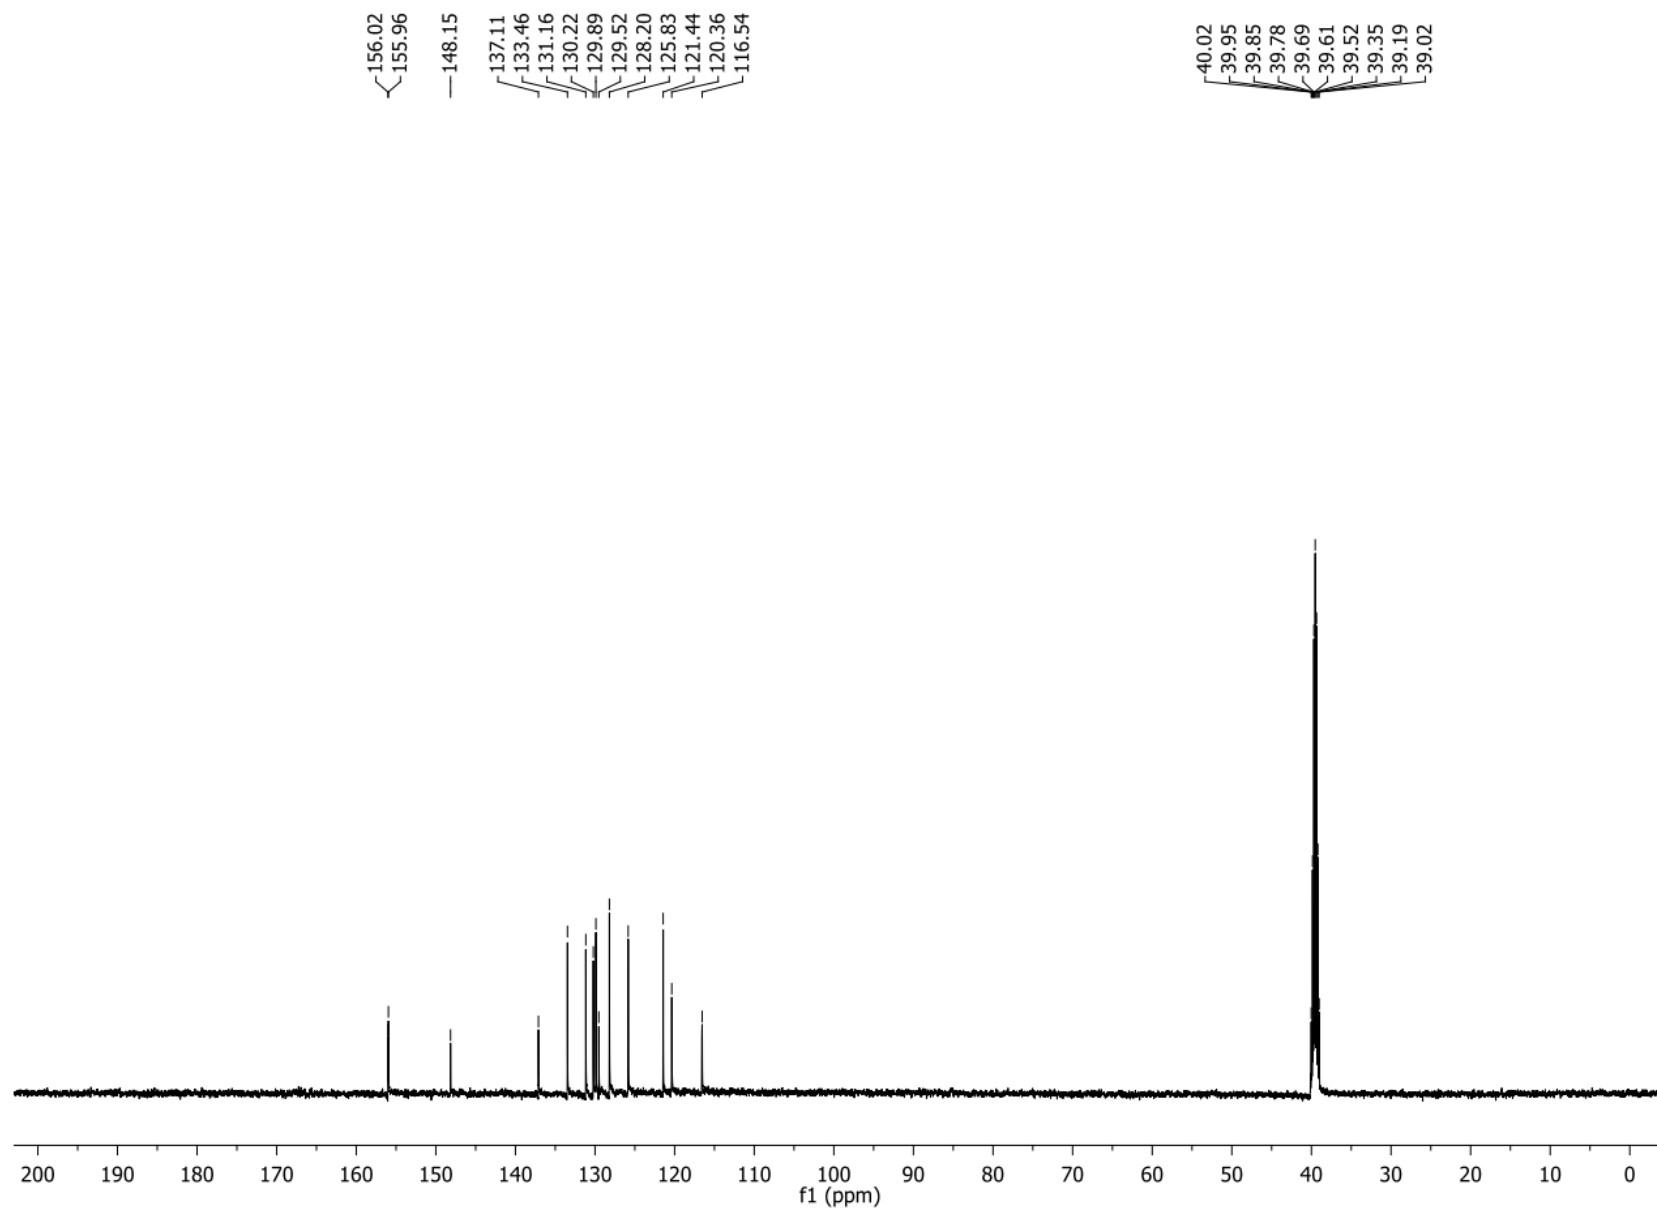

**Figure S18.** The  $^{13}\text{C}$  NMR of 3-nitrodibenzo[*b,f*]oxepine (**2a**).

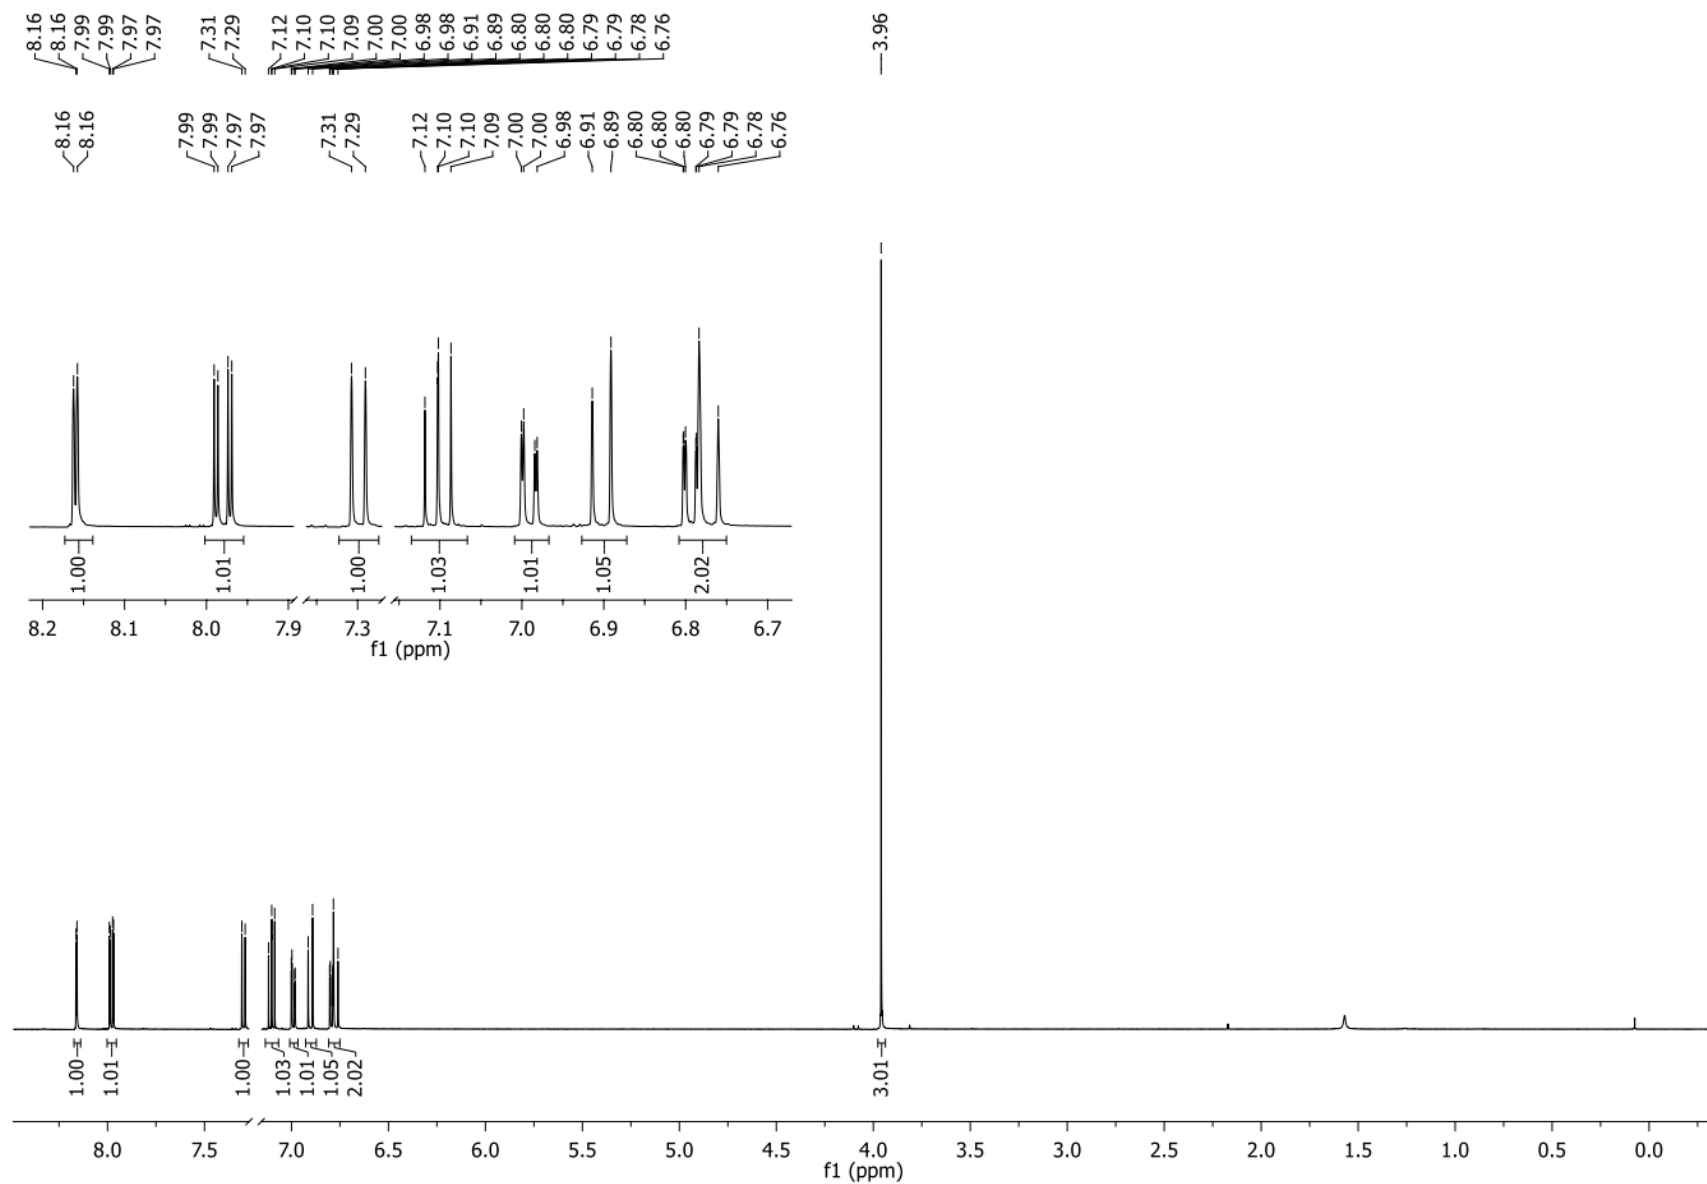

**Figure S19.** The  $^1\text{H}$  NMR of 6-methoxy-3-nitrodibenzo[*b,f*]oxepine (**2b**).

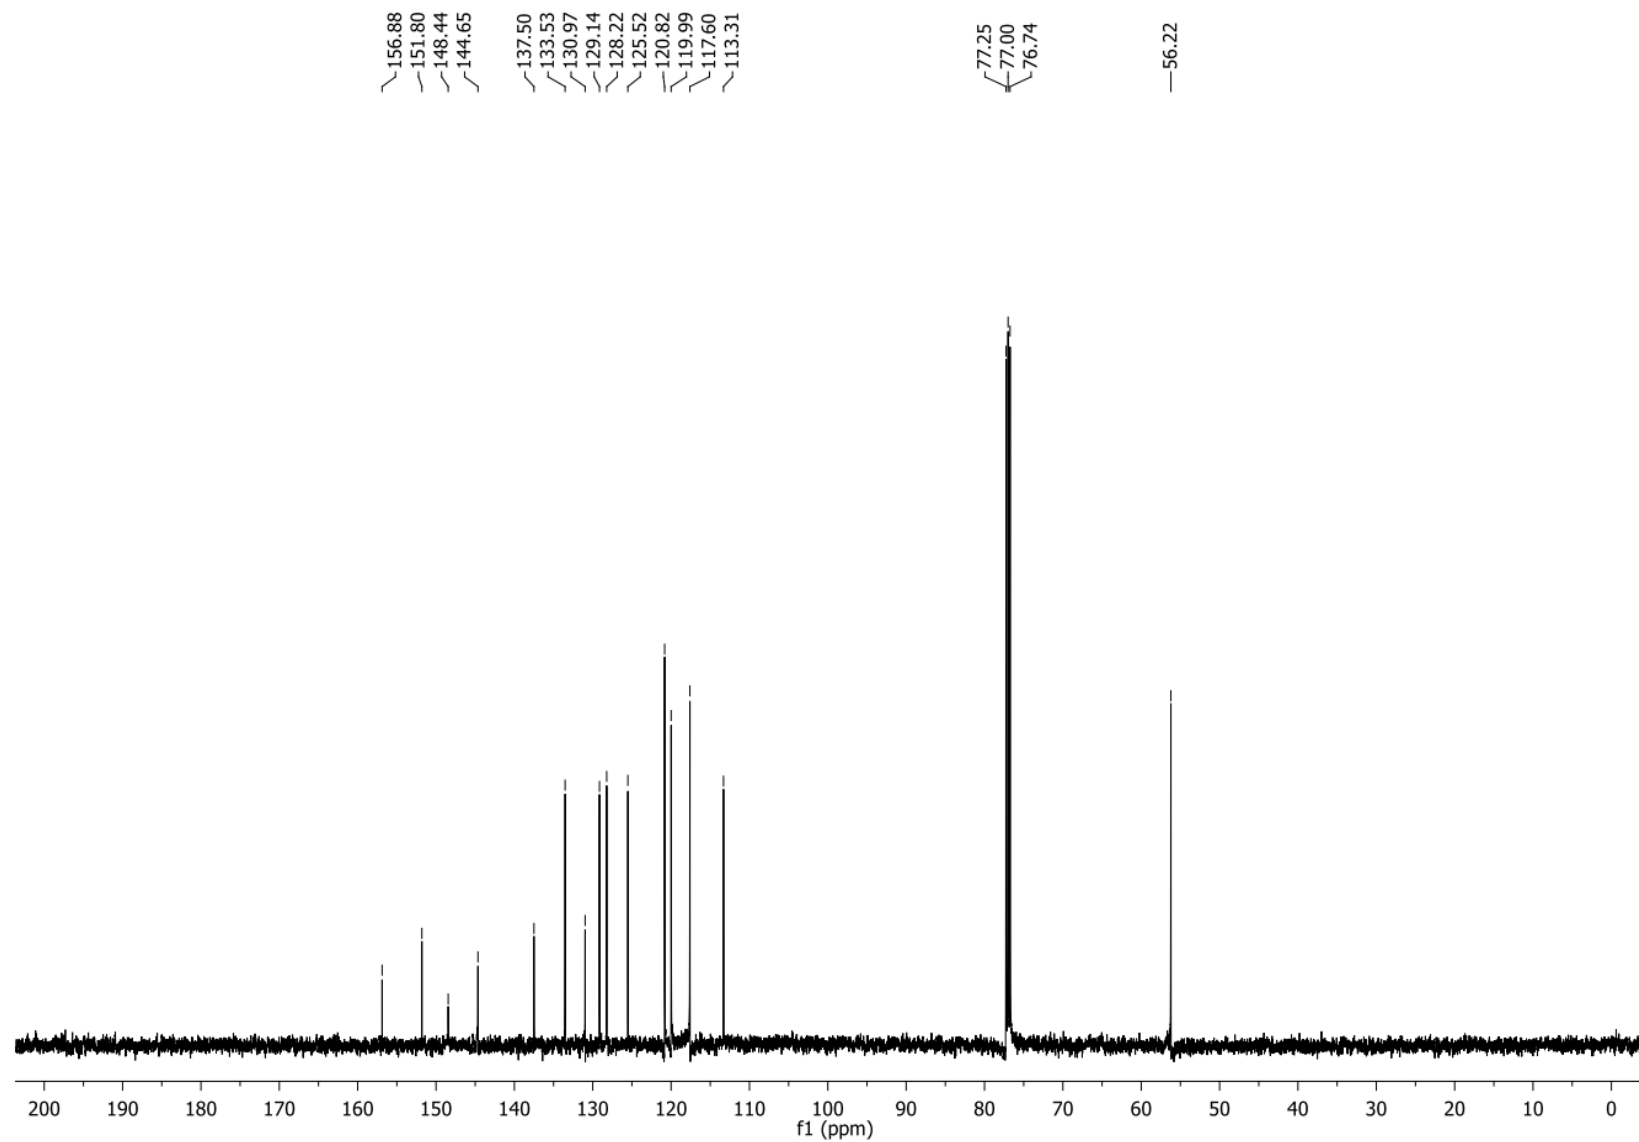

**Figure S20.** The  $^{13}\text{C}$  NMR of 6-methoxy-3-nitrodibenzo[*b,f*]oxepine (2b).

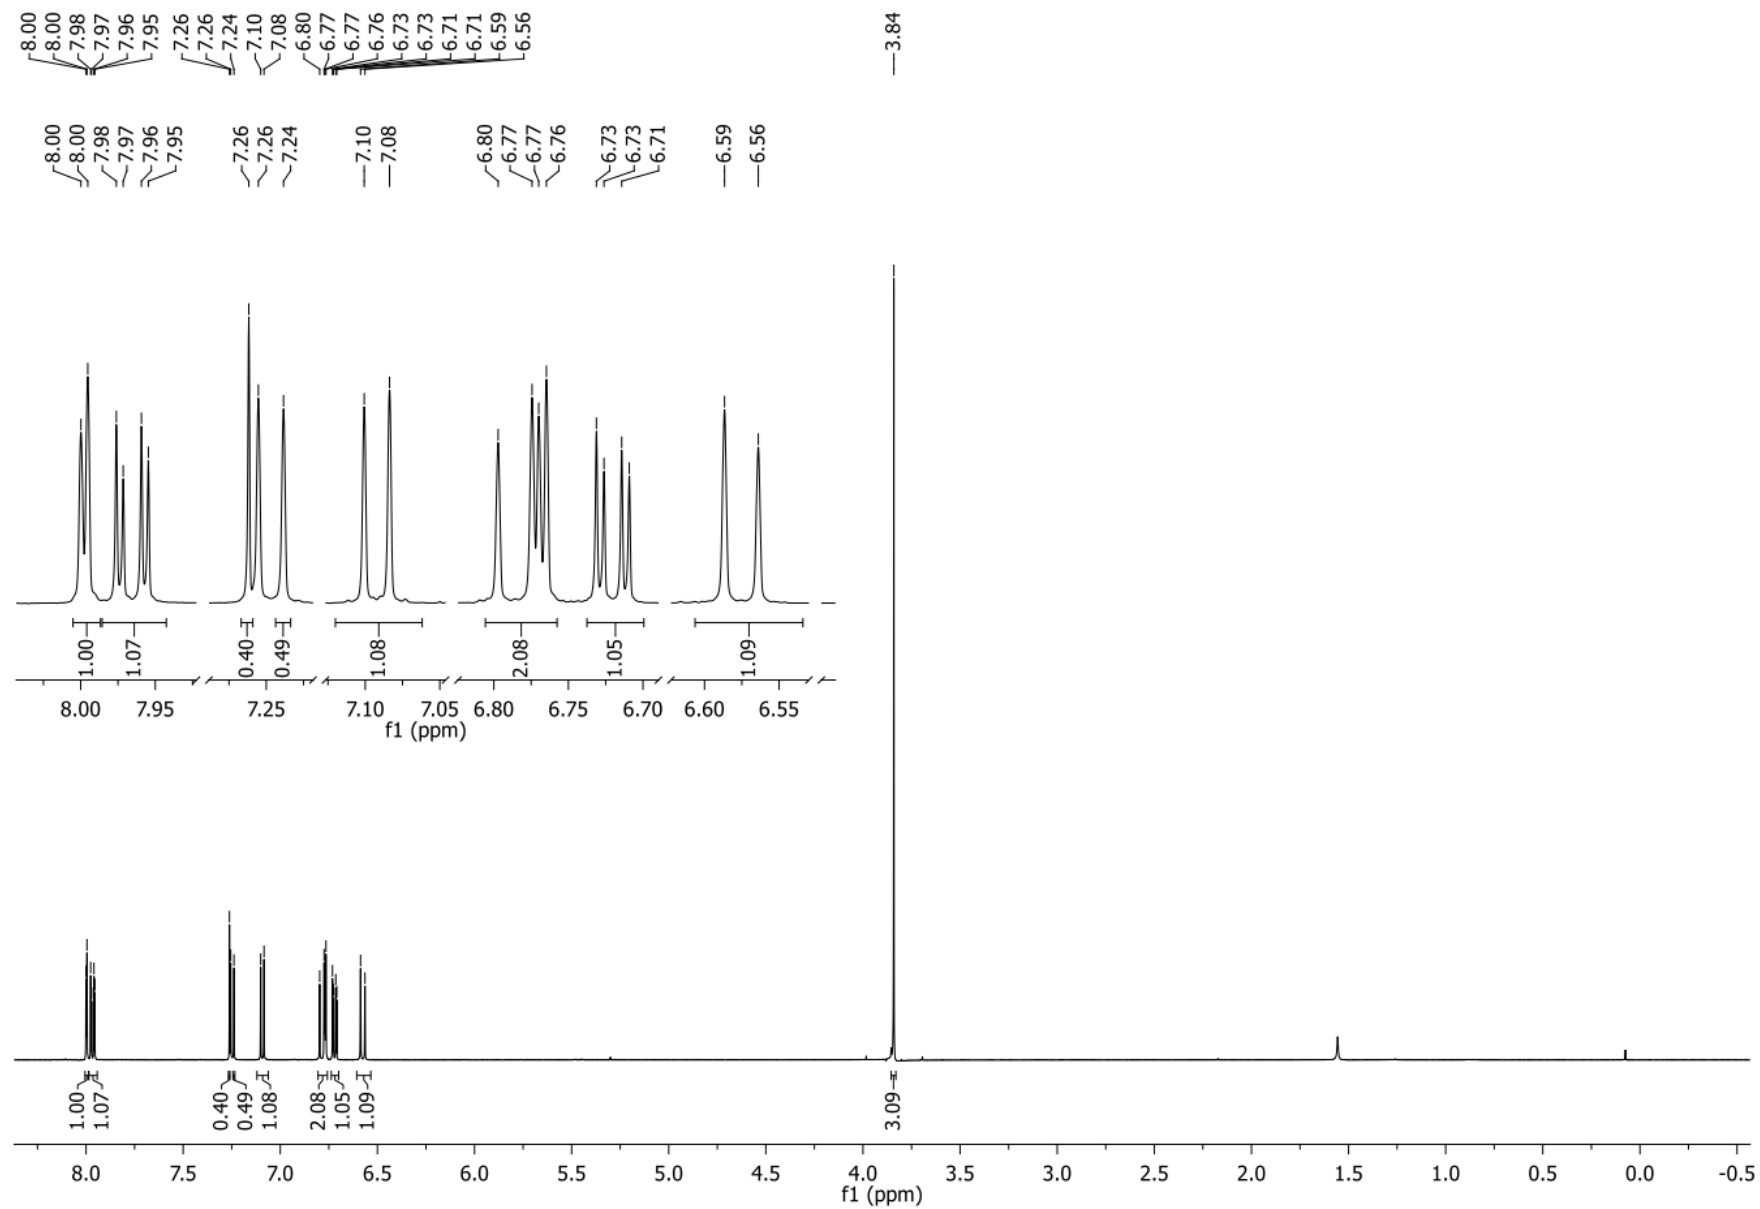

**Figure S21.** The  $^1\text{H}$  NMR of 3-methoxy-7-nitrodibenzo[*b,f*]oxepine (**2c**).

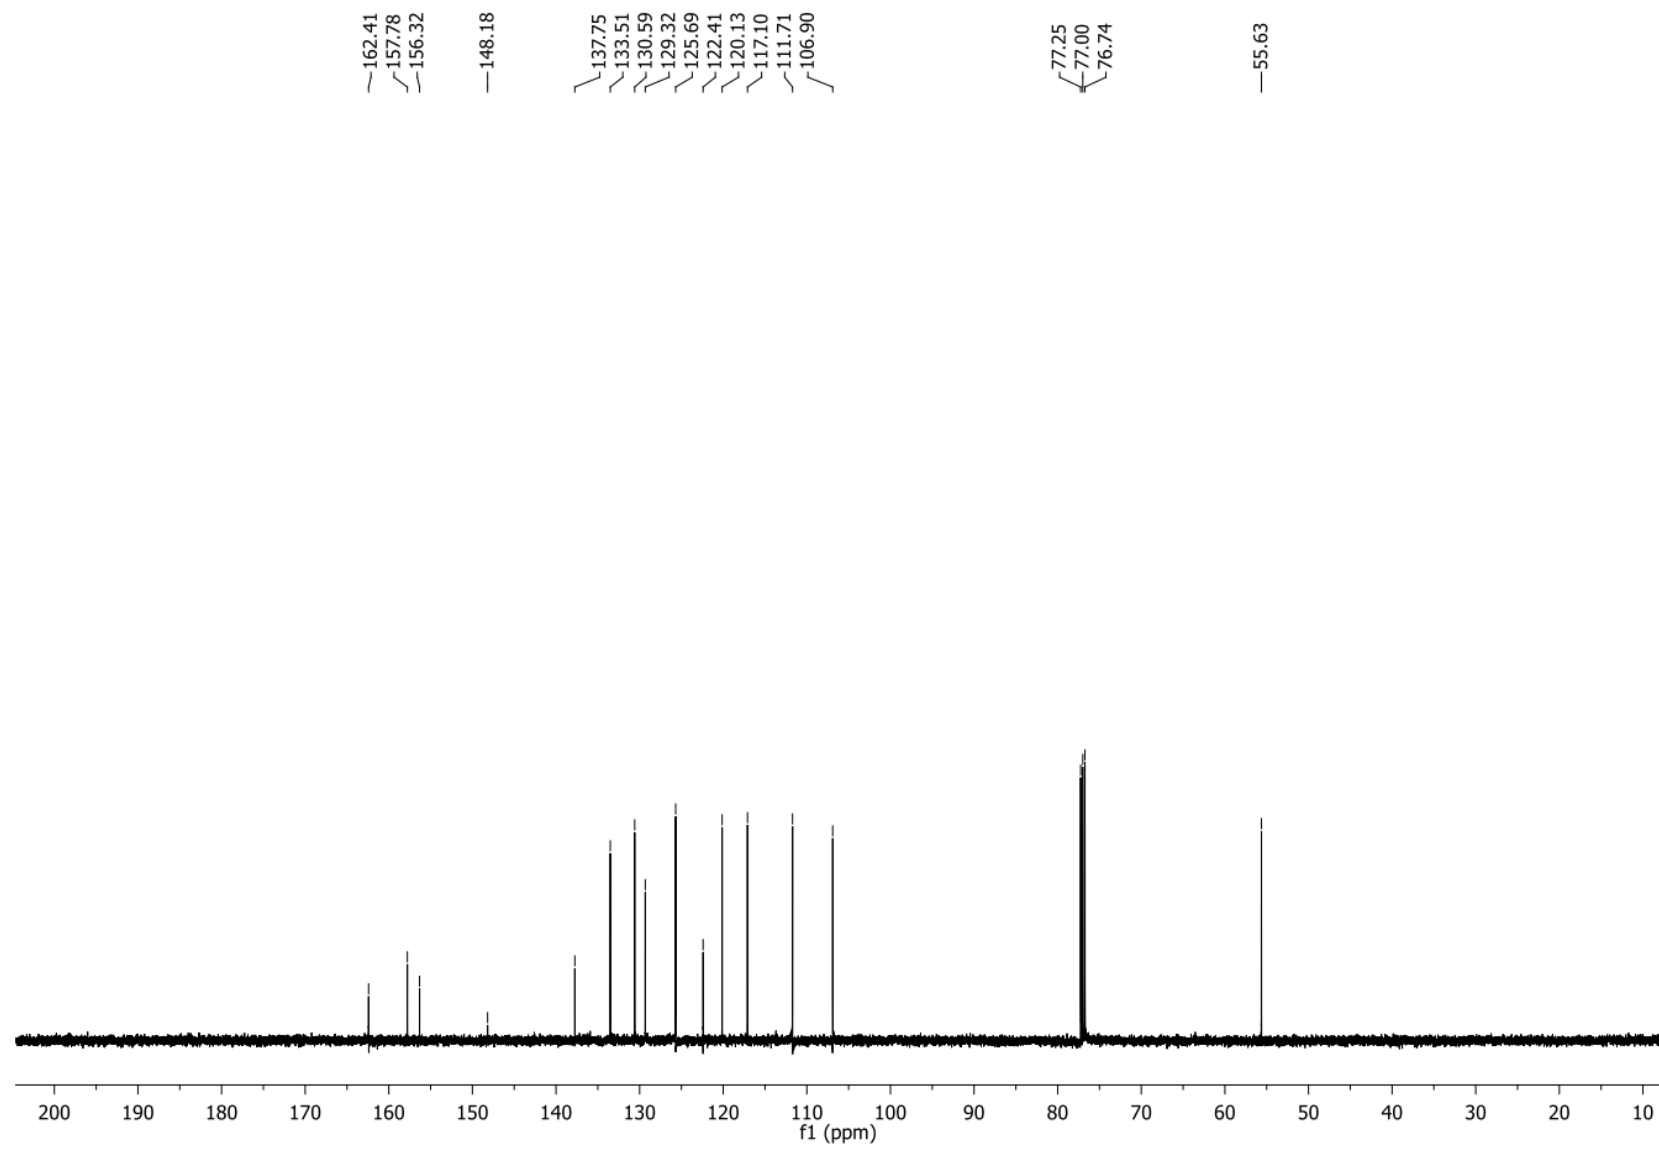

**Figure S22.** The  $^{13}\text{C}$  NMR of 3-methoxy-7-nitrodibenzo[*b,f*]oxepine (2c).

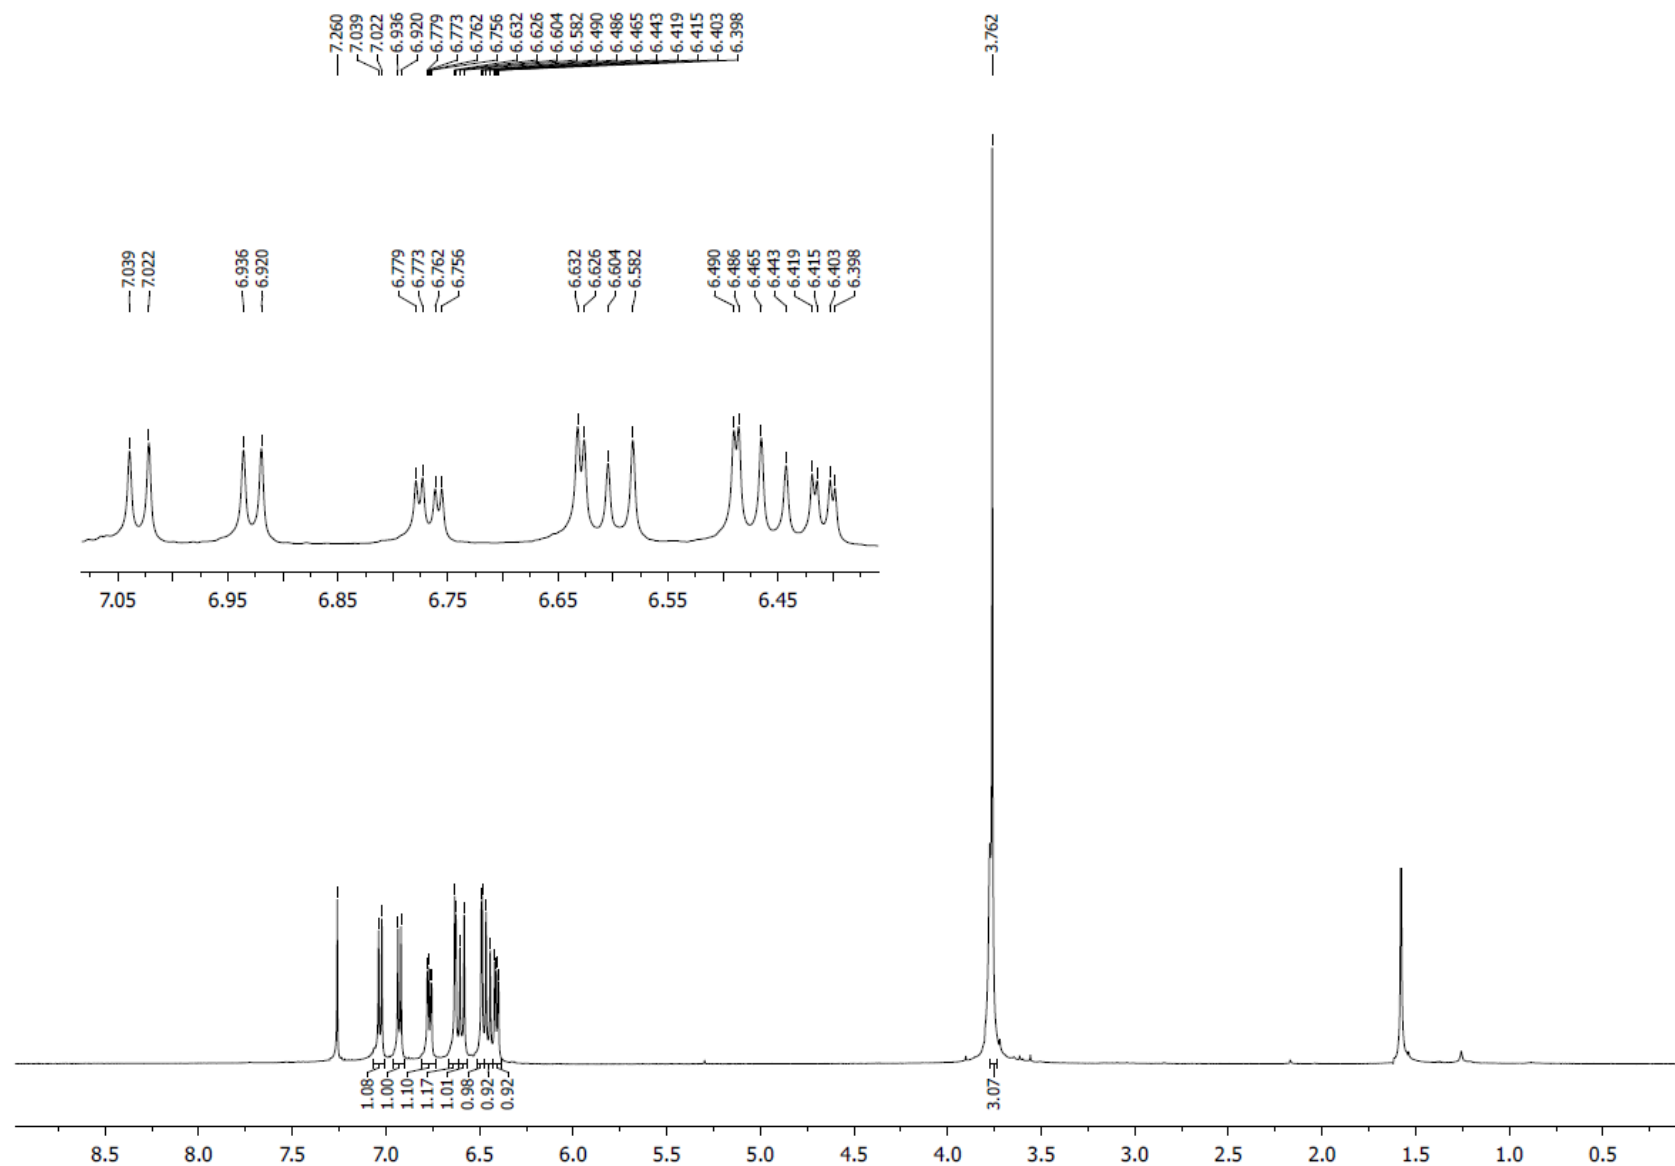

**Figure S23.** The  $^1\text{H}$  NMR of 2-methoxy-7-nitrodibenzo[*b,f*]oxepine (**2d**).



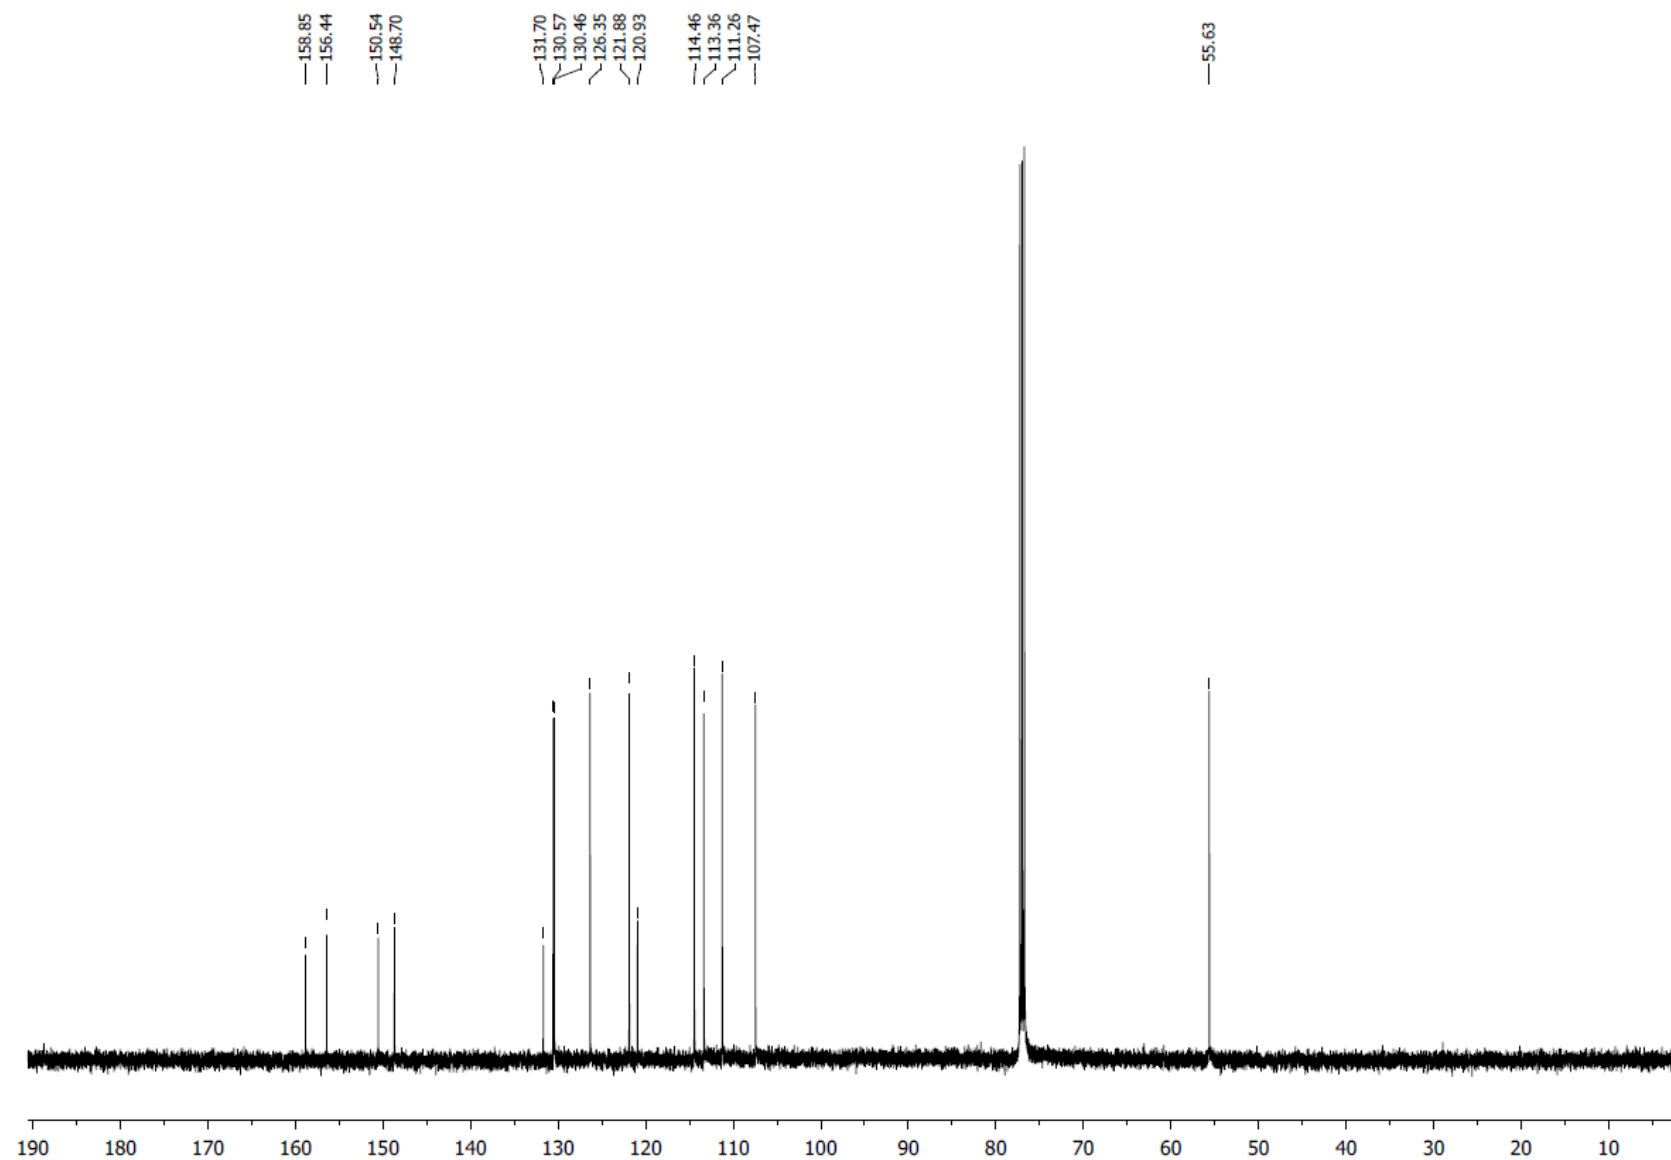

**Figure S24.** The  $^{13}\text{C}$  NMR of 2-methoxy-7-nitrodibenzo[*b,f*]oxepine (2d).

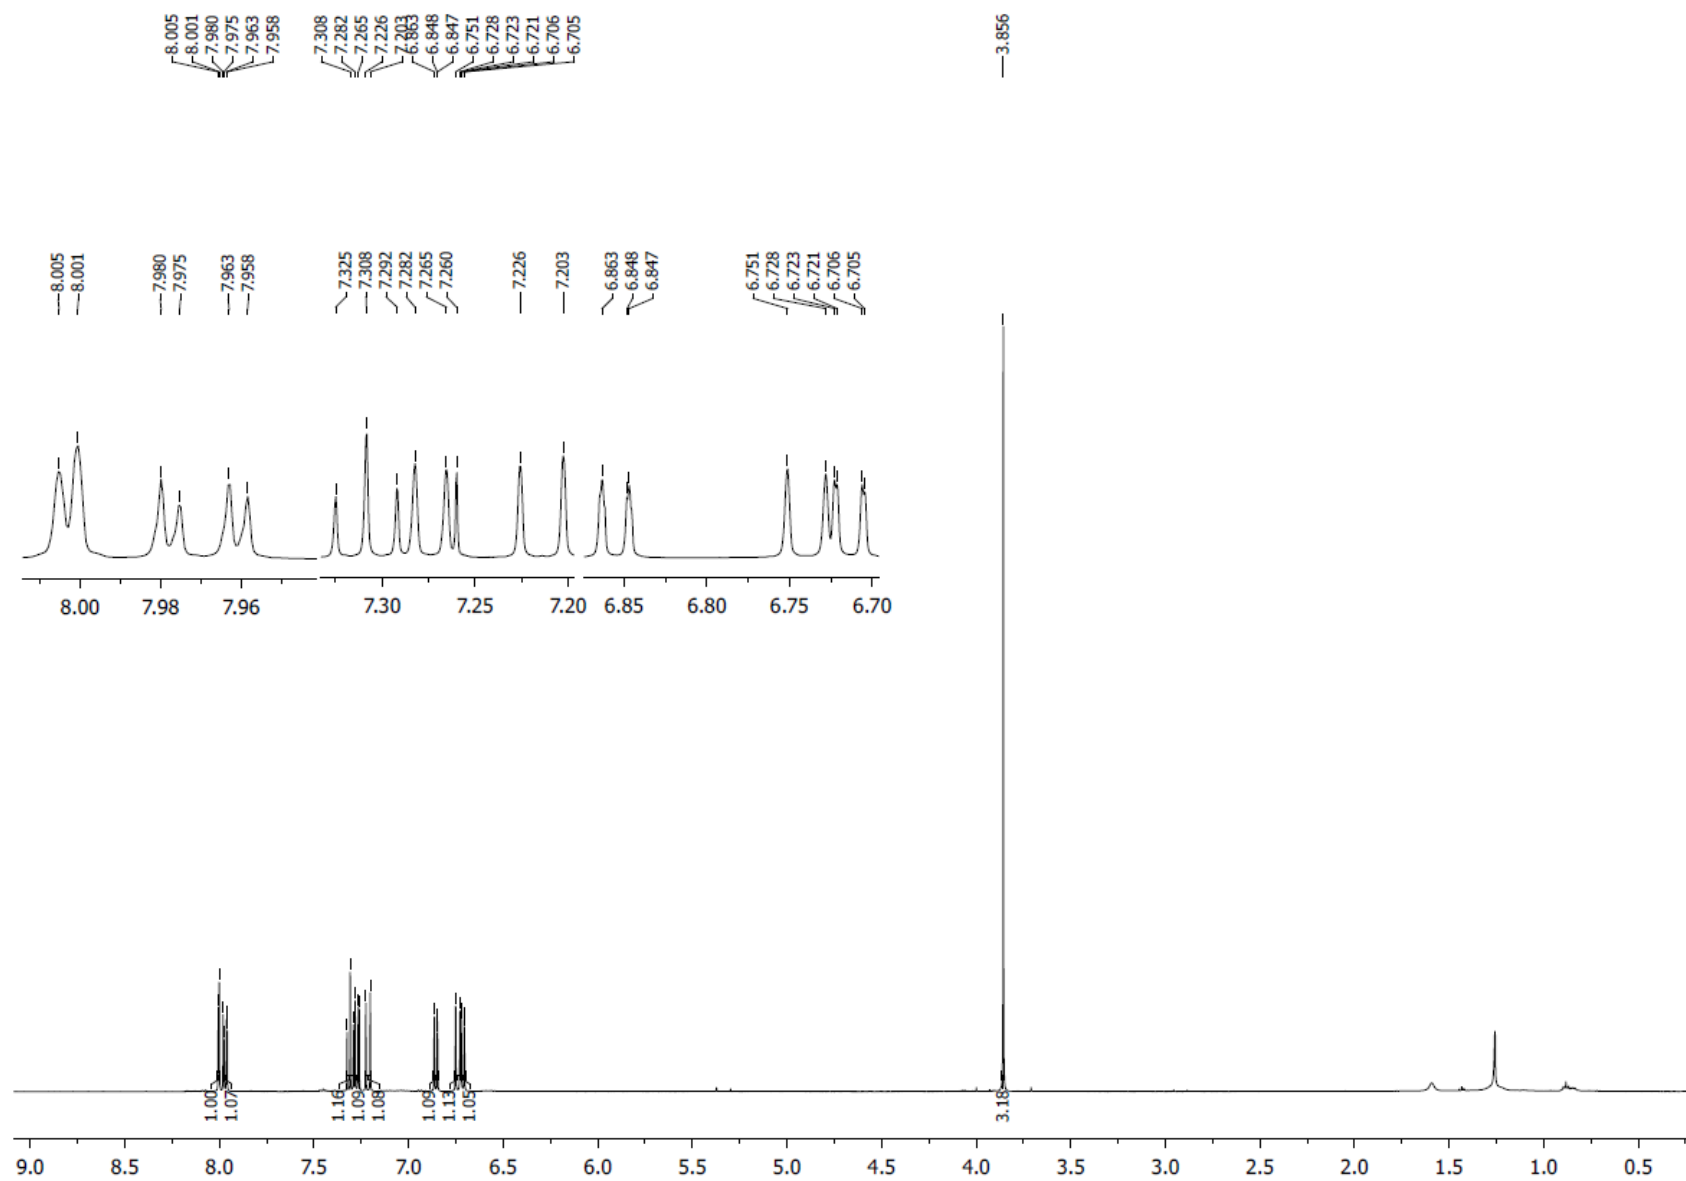

**Figure S25.** The  $^1\text{H}$  NMR of 1-methoxy-7-nitrodibenzo[*b,f*]oxepine (2e).

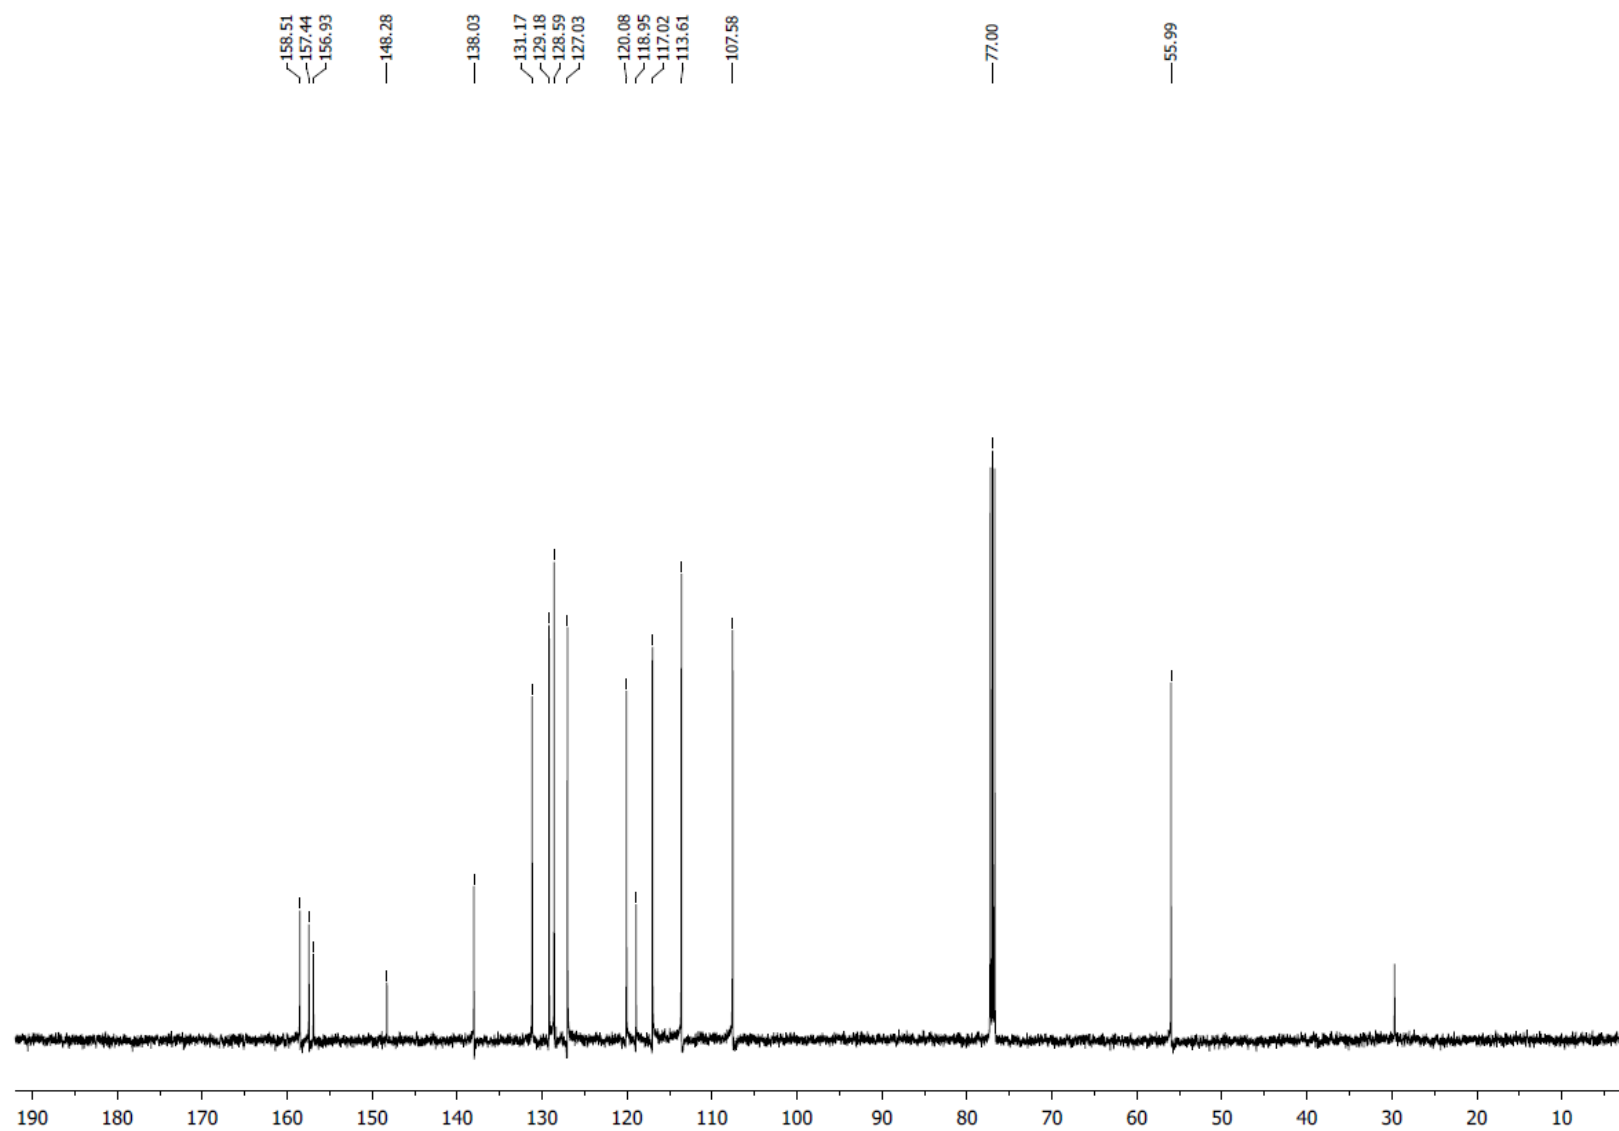

**Figure S26.** The  $^{13}\text{C}$  NMR of 1-methoxy-7-nitrodibenzo[*b,f*]oxepine (**2e**).

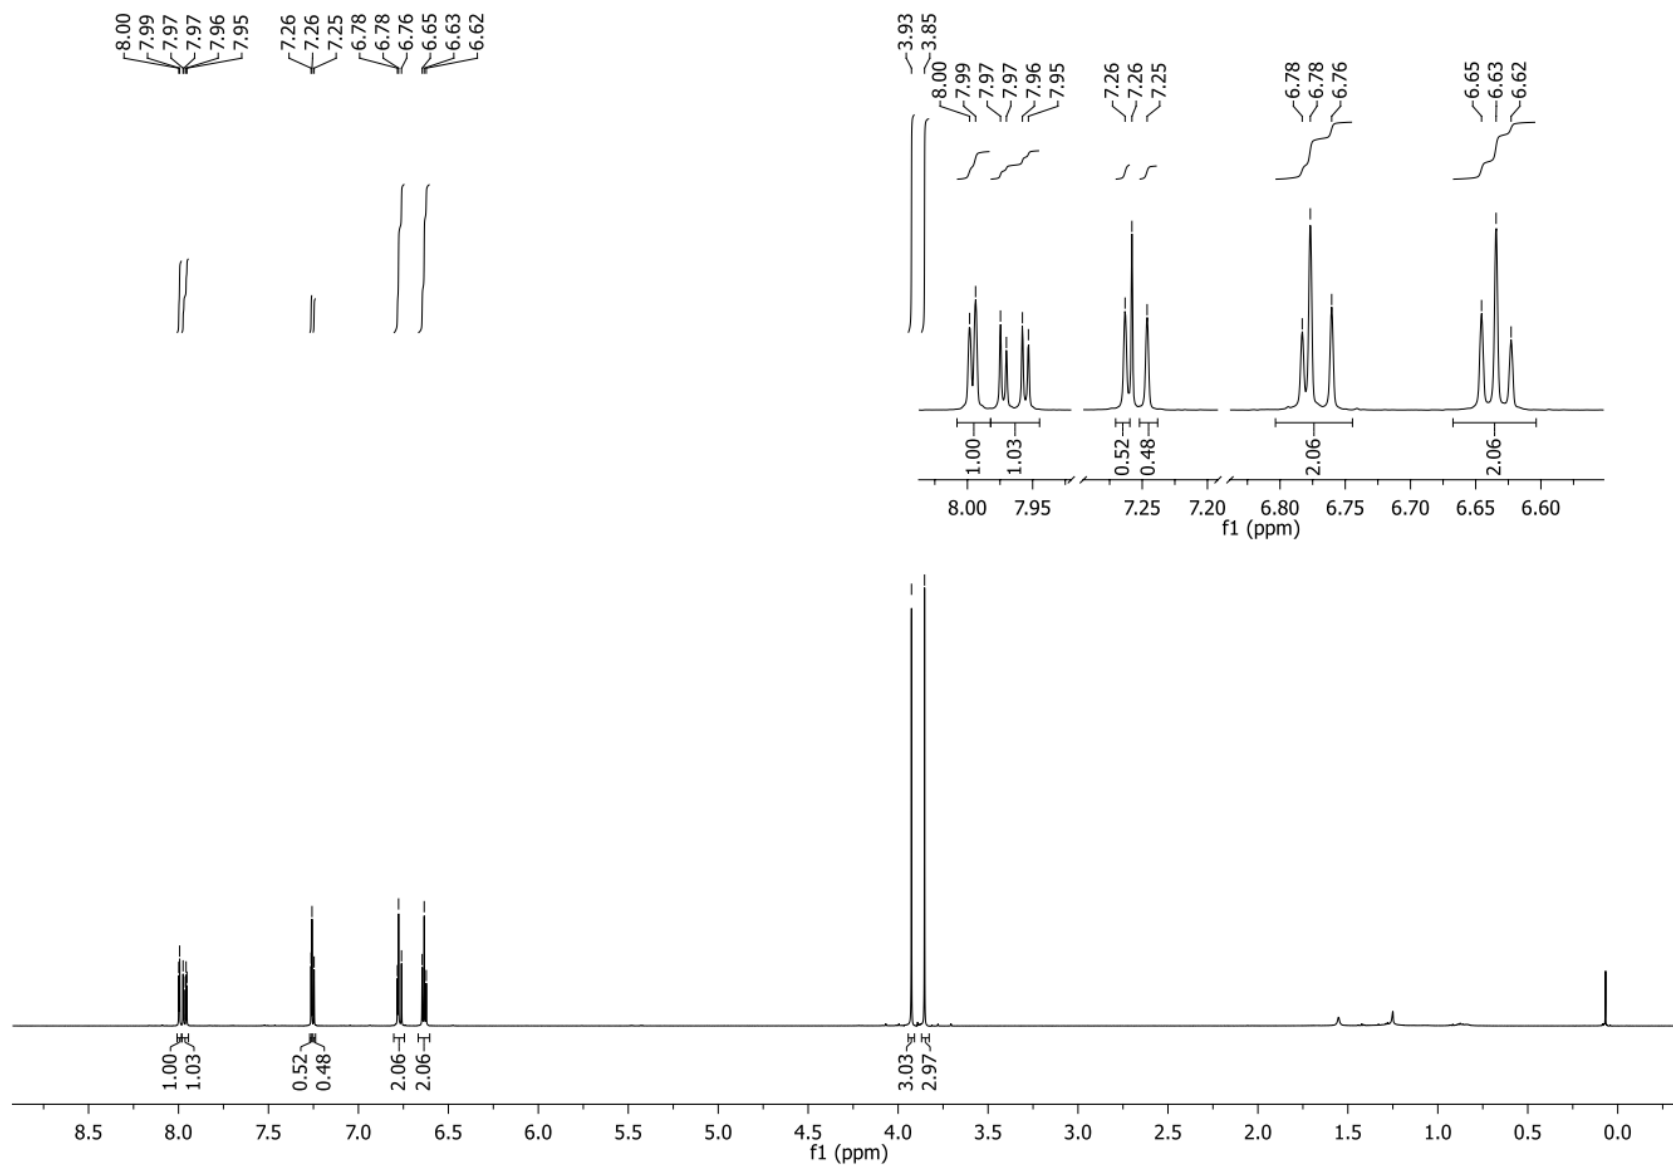

**Figure S27.** The  $^1\text{H}$  NMR of 2,3-dimethoxy-7-nitrodibenzo[*b,f*]oxepine (**2f**).

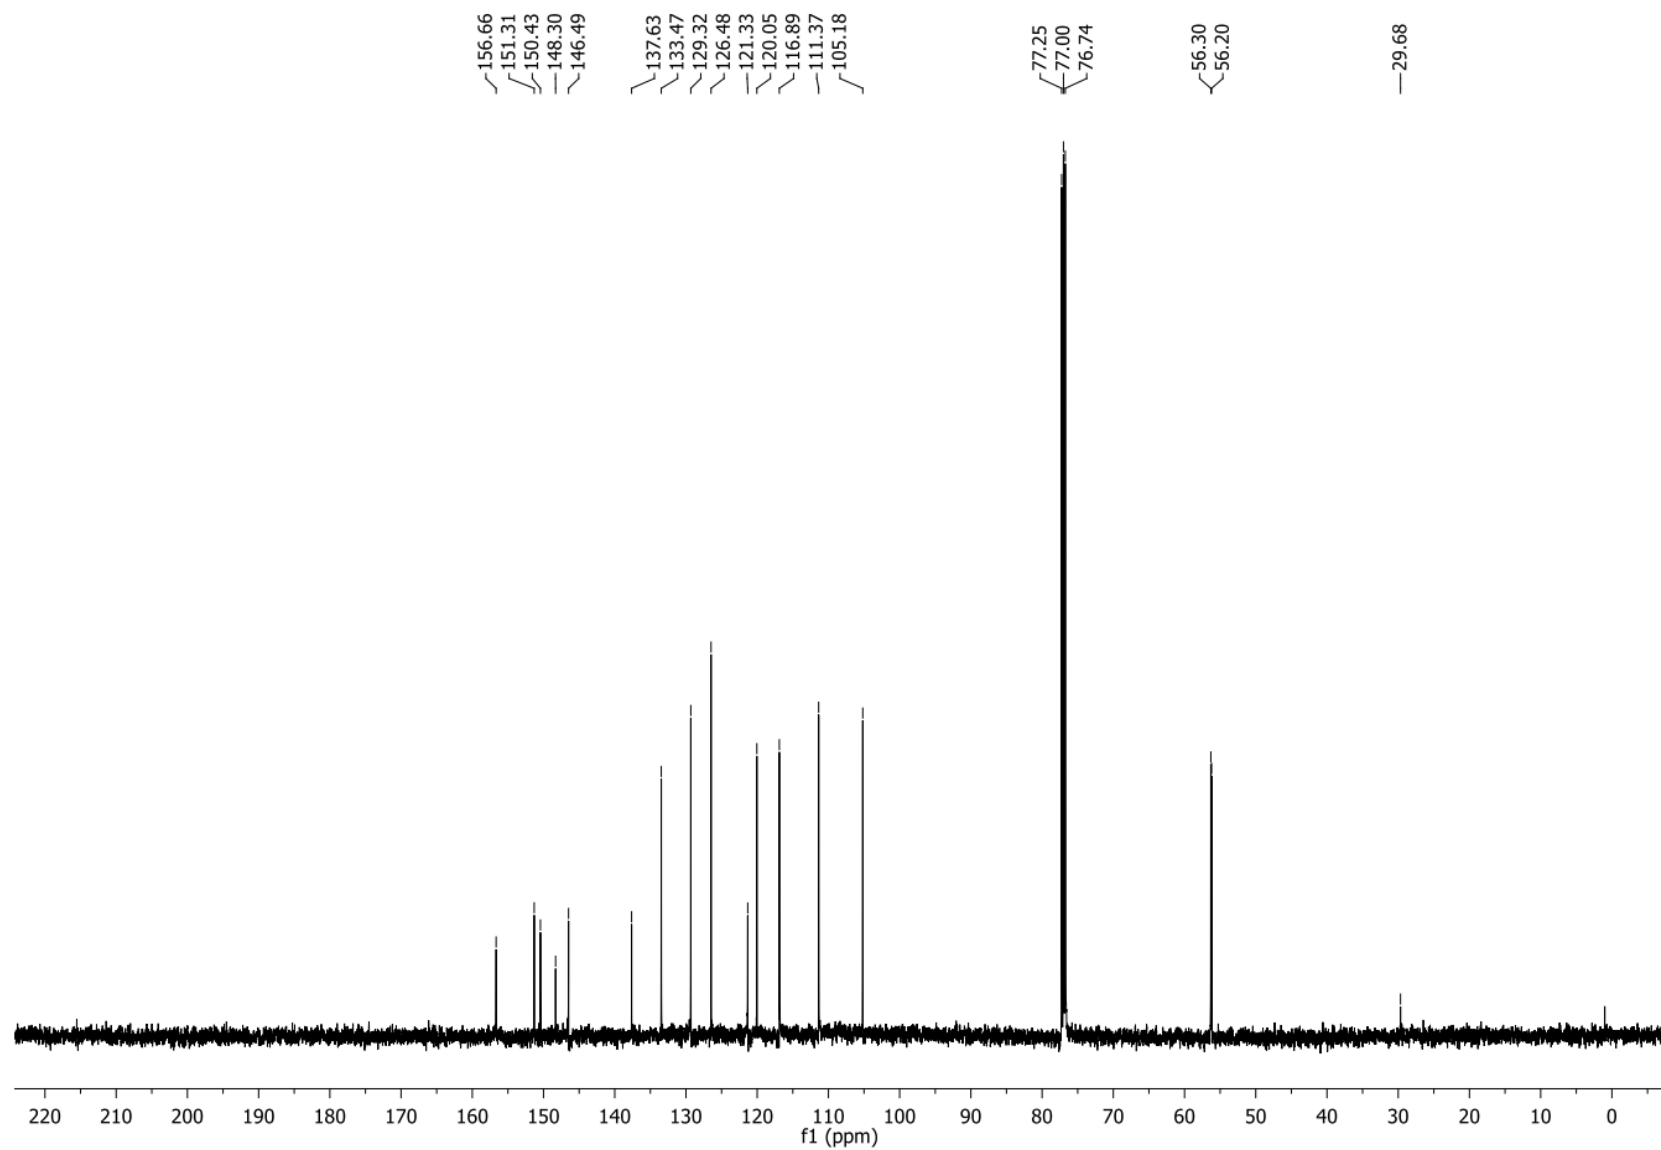

**Figure S28.** The <sup>13</sup>C NMR of 2,3-dimethoxy-7-nitrodibenzo[*b,f*]oxepine (**2f**).

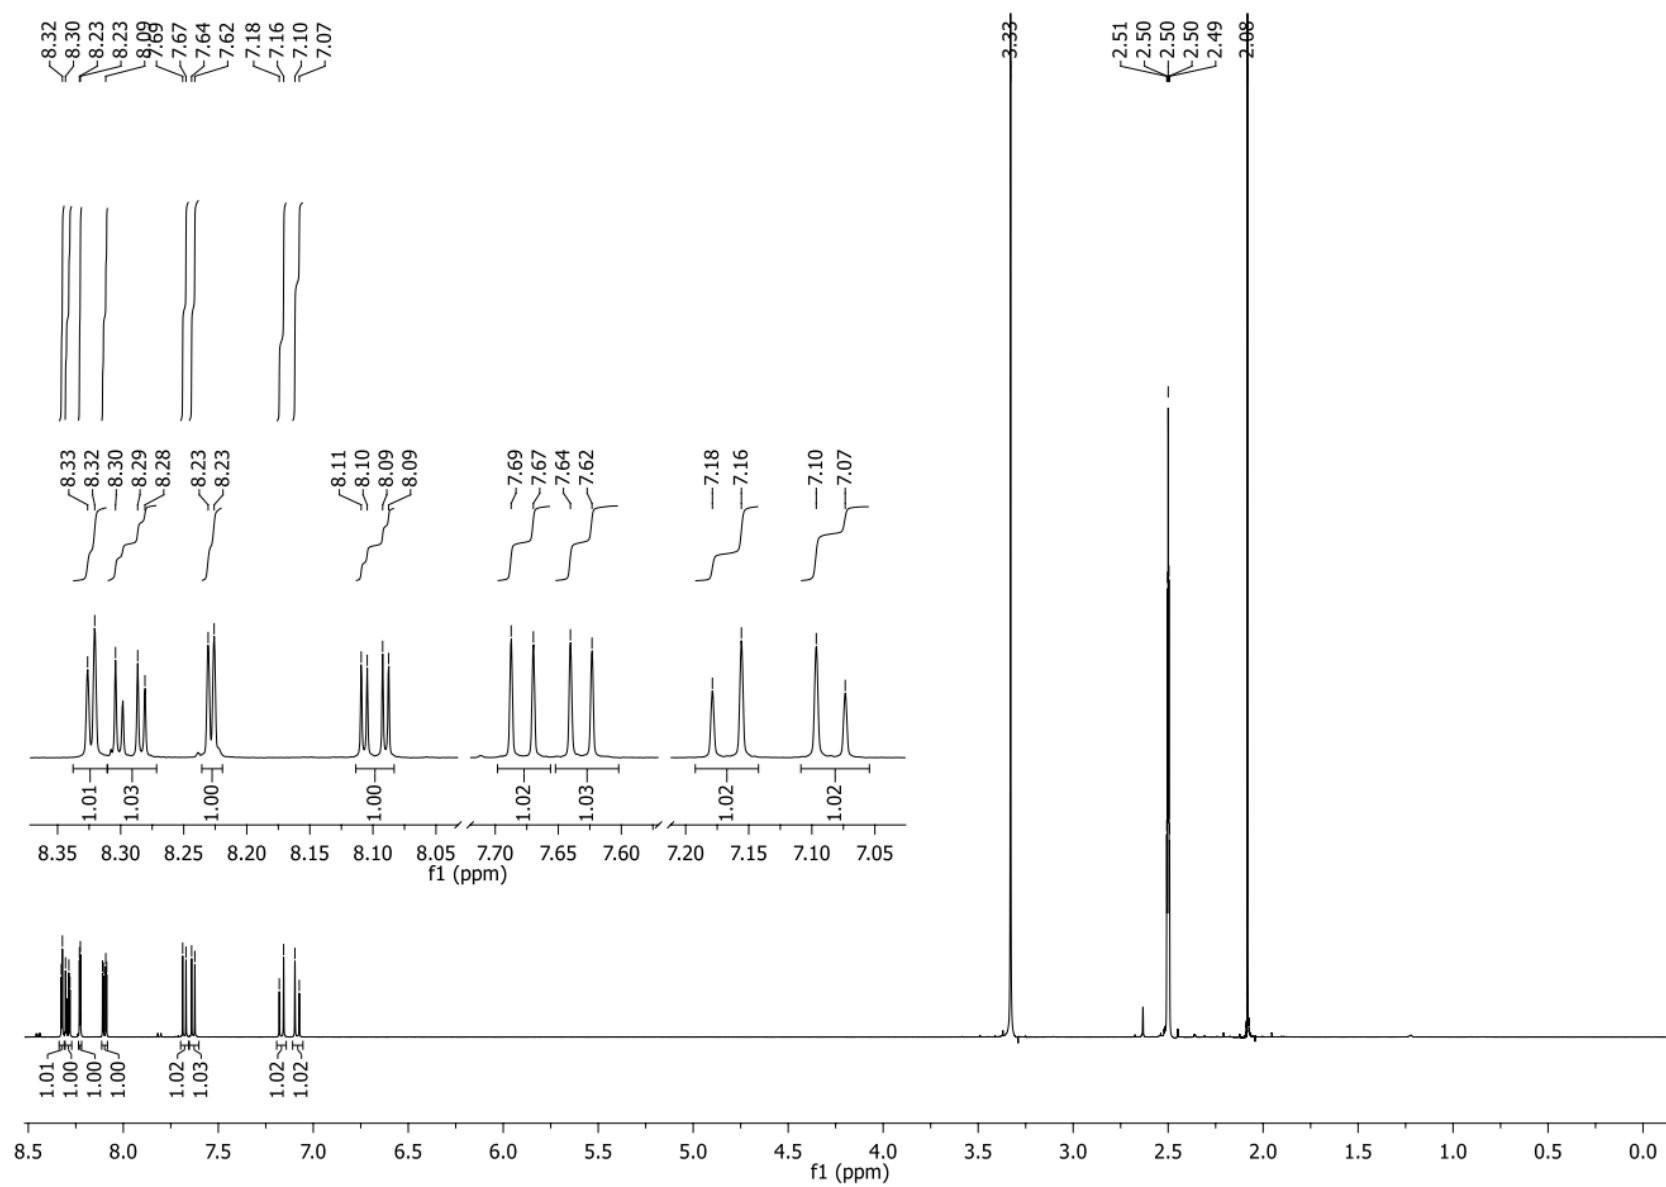

**Figure S29.** The <sup>1</sup>H NMR of 2,7-dinitrodibenzo[*b,f*]oxepine (**2g**).

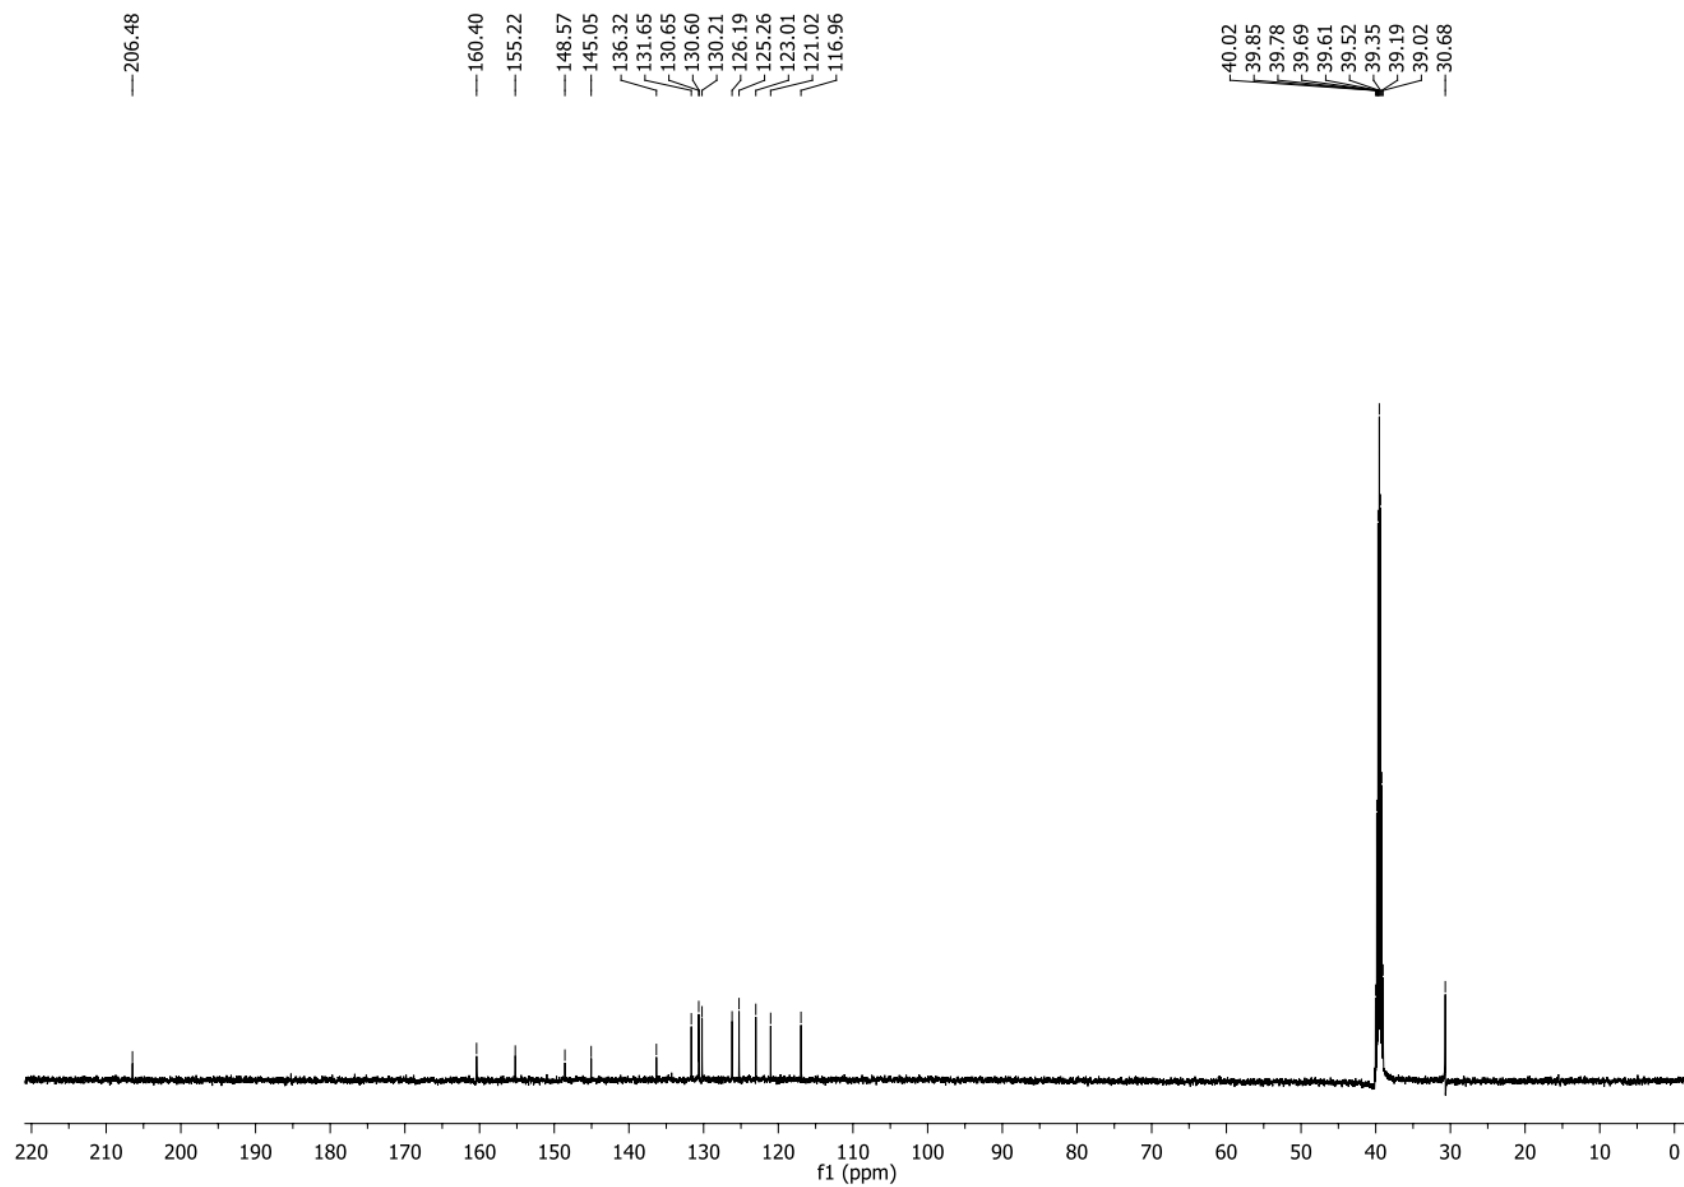

**Figure S30.** The <sup>13</sup>C NMR of 2,7-dinitrodibenzo[*b,f*]oxepine (**2g**).





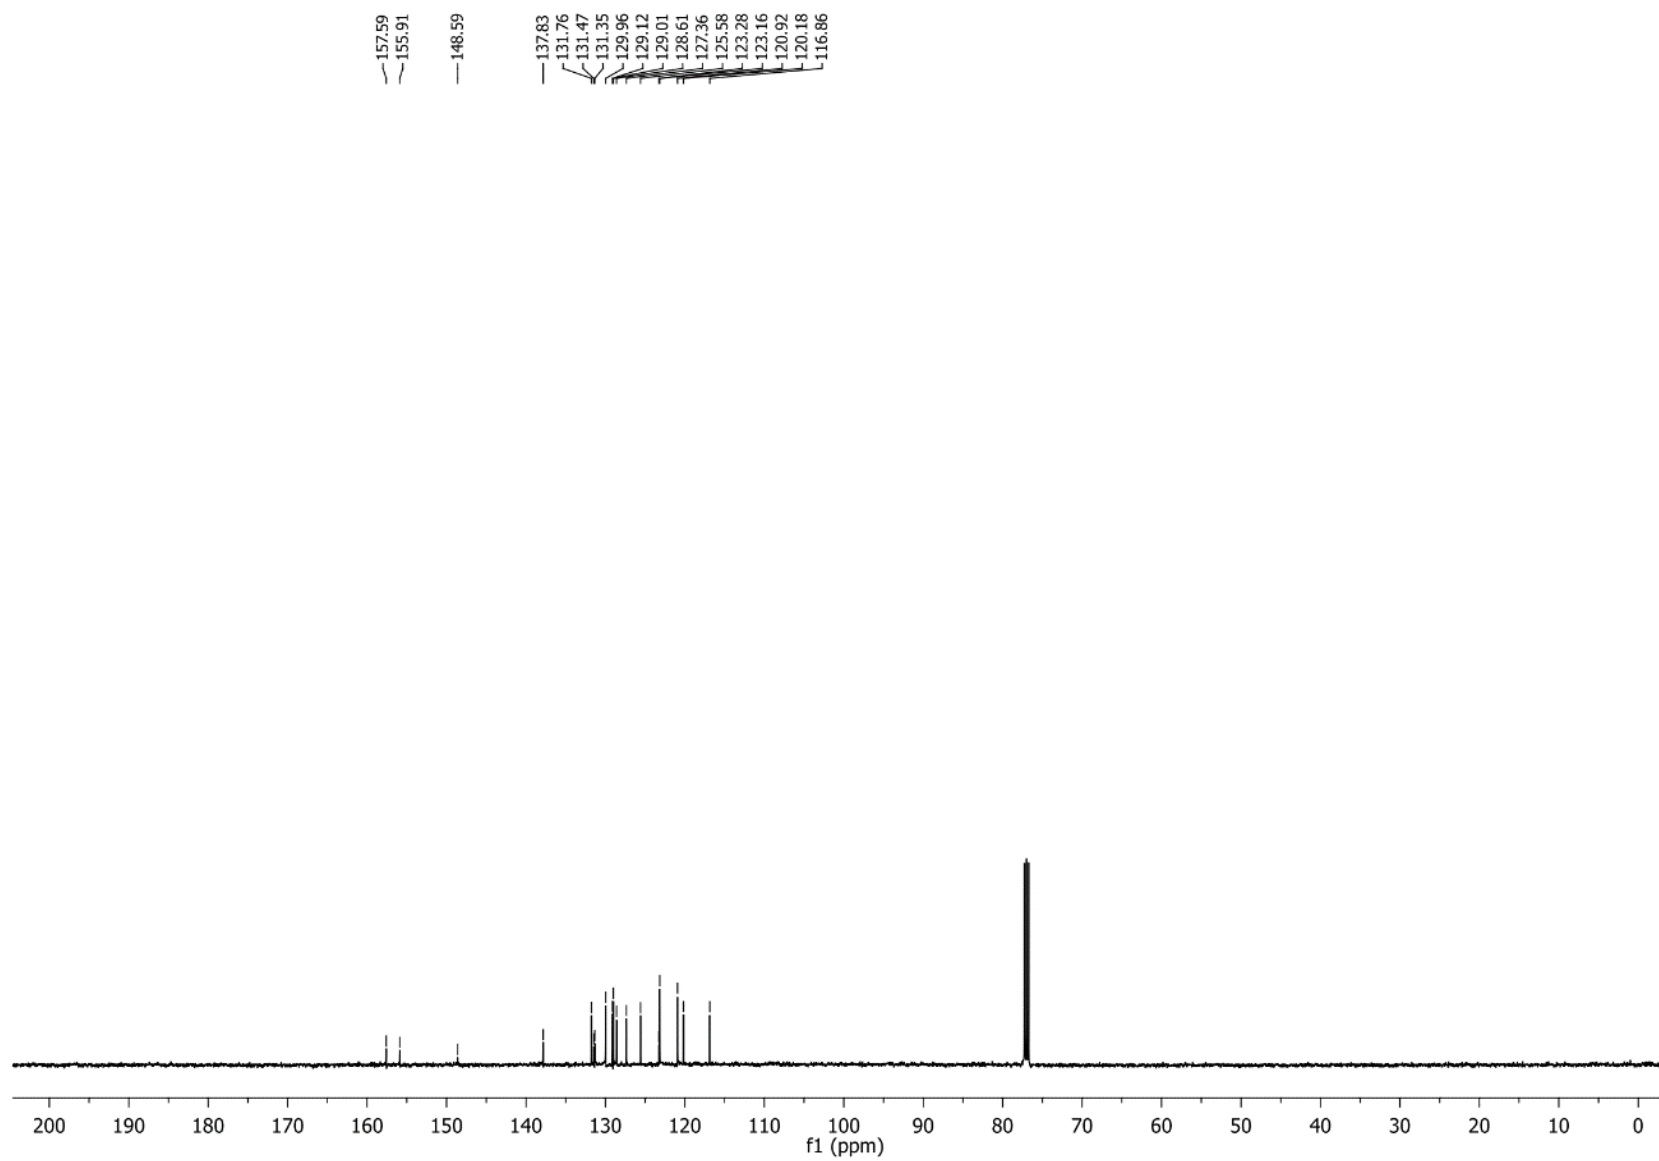

**Figure S32.** The  $^{13}\text{C}$  NMR of 9-nitrobenzo[*b*]naphtho[*1,2-f*]oxepine (**2h**).

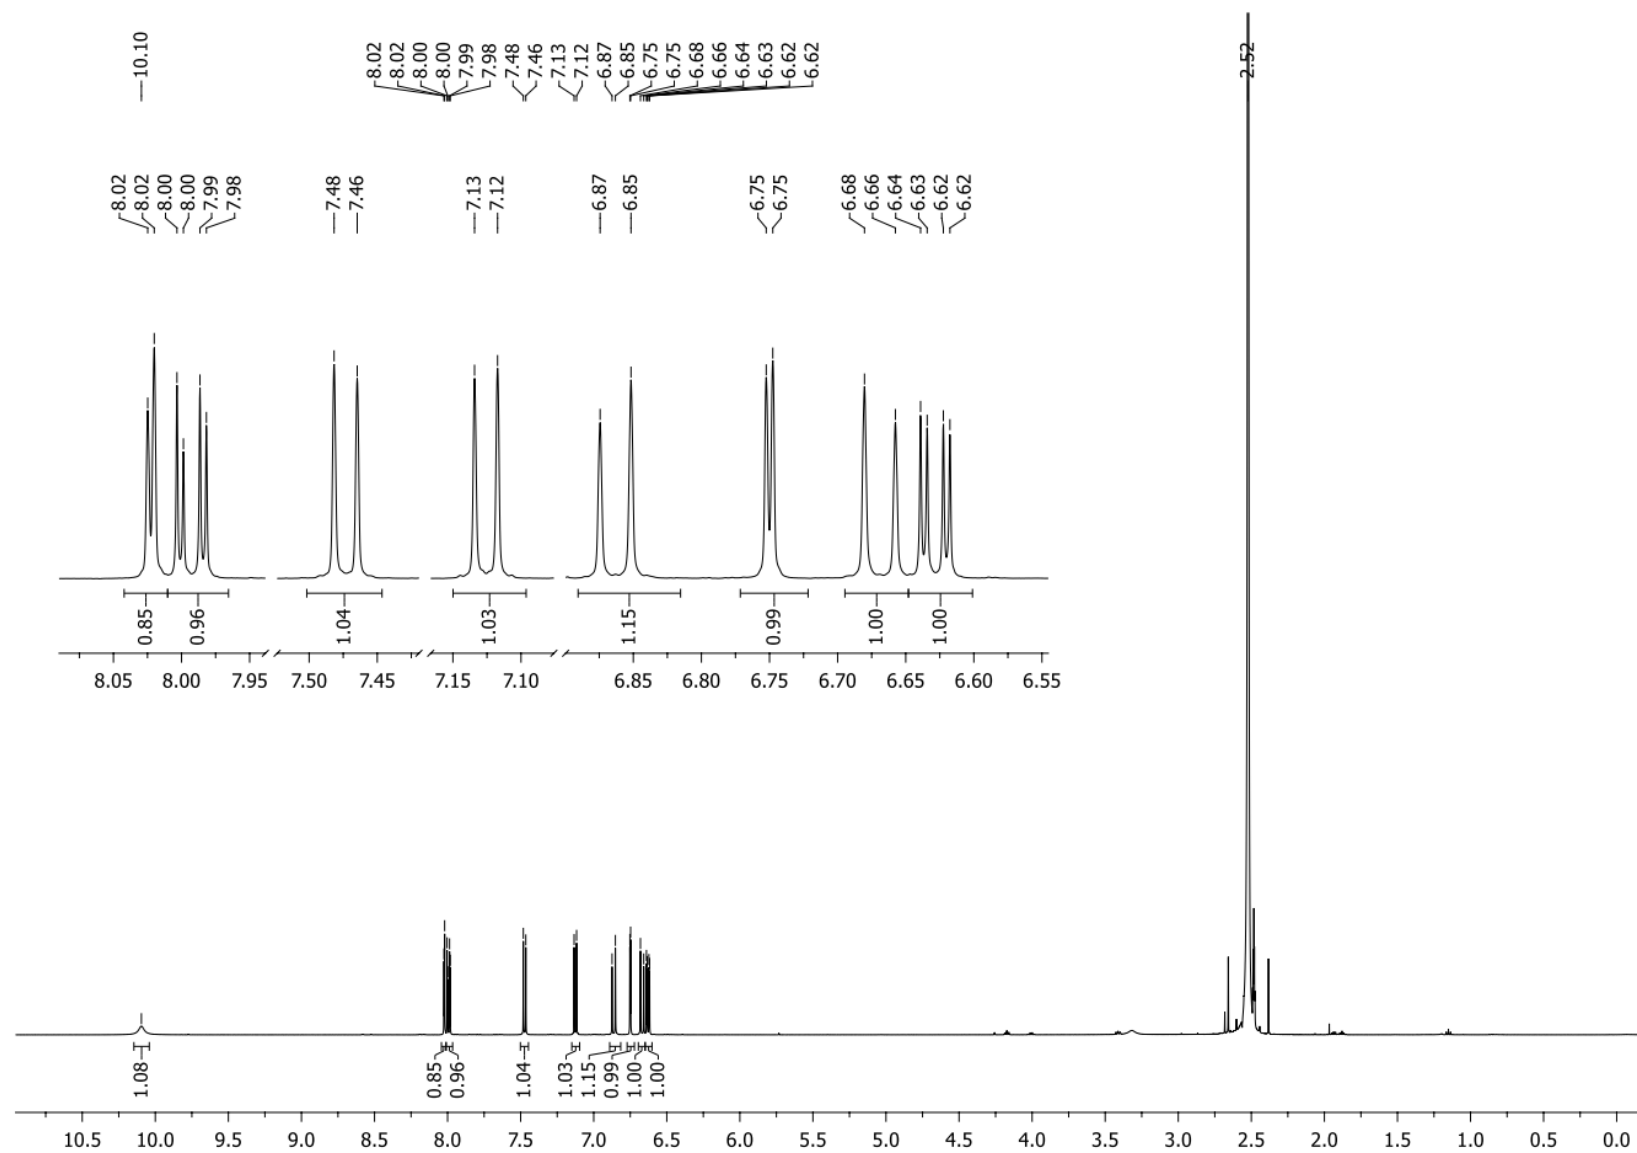

**Figure S33.** The  $^1\text{H}$  NMR of 7-nitrodibenzo[*b,f*]oxepin-3-ol (**2i**).

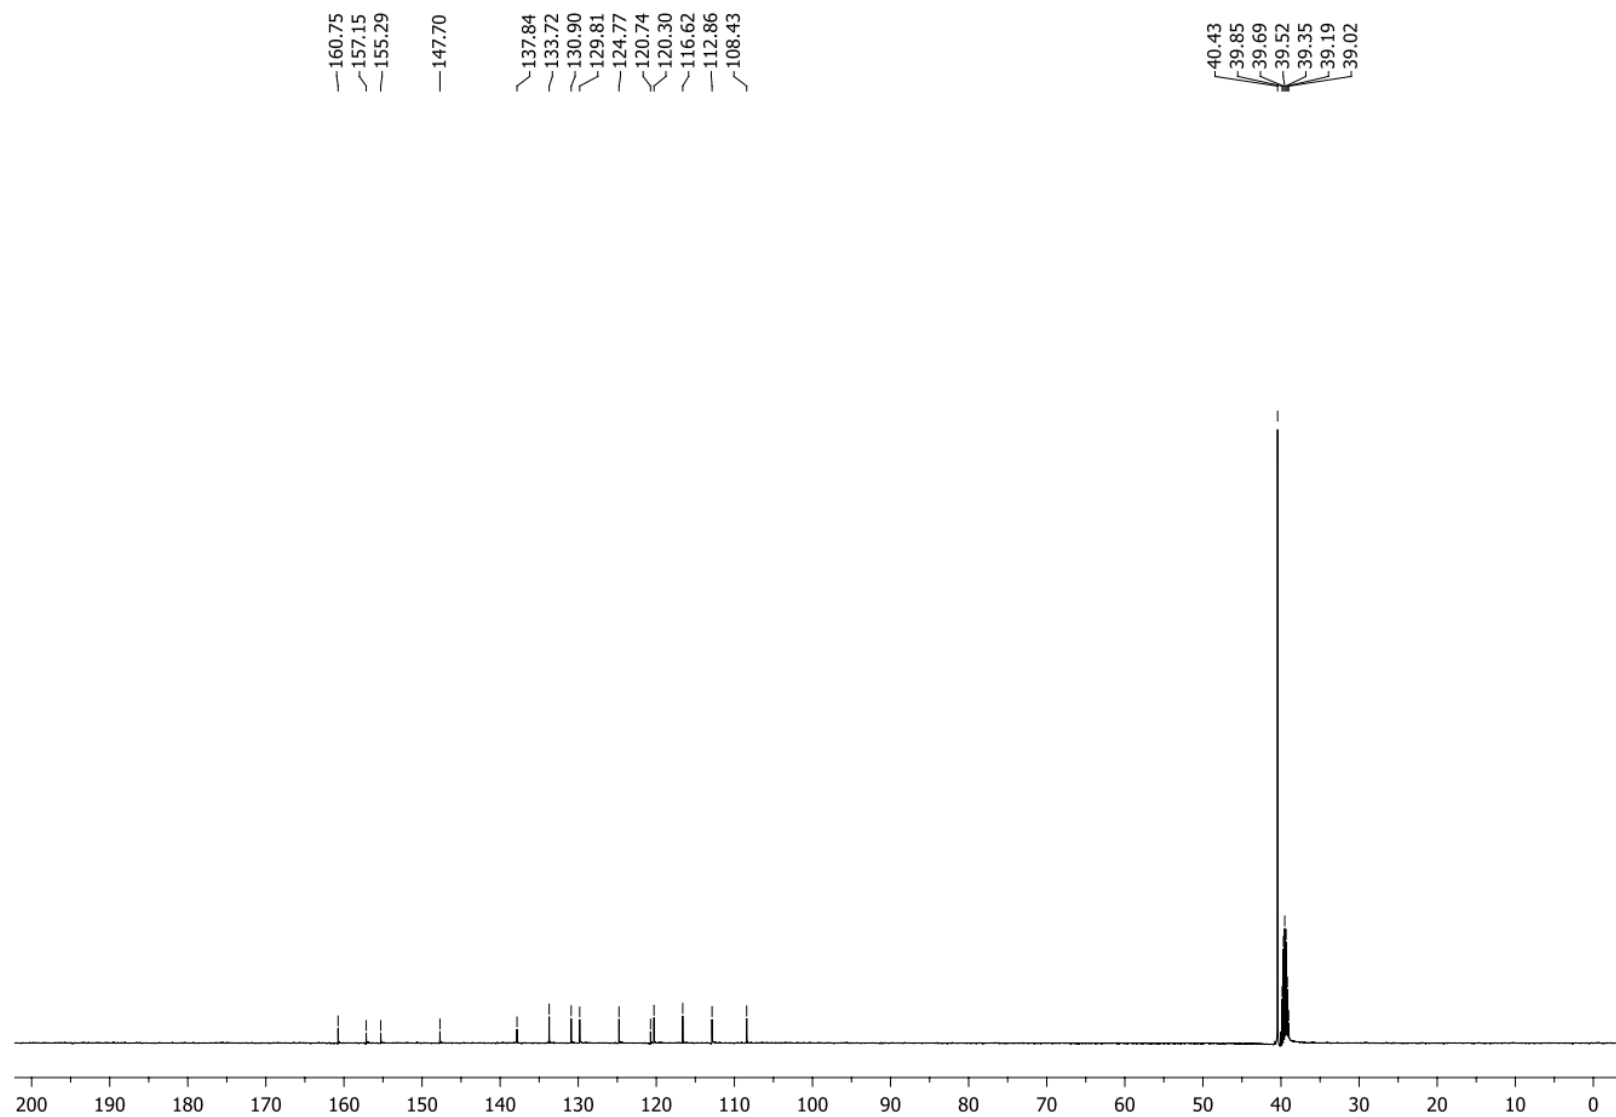

**Figure S34.** The  $^{13}\text{C}$  NMR of 7-nitrodibenzo[*b,f*]oxepin-3-ol (**2i**).

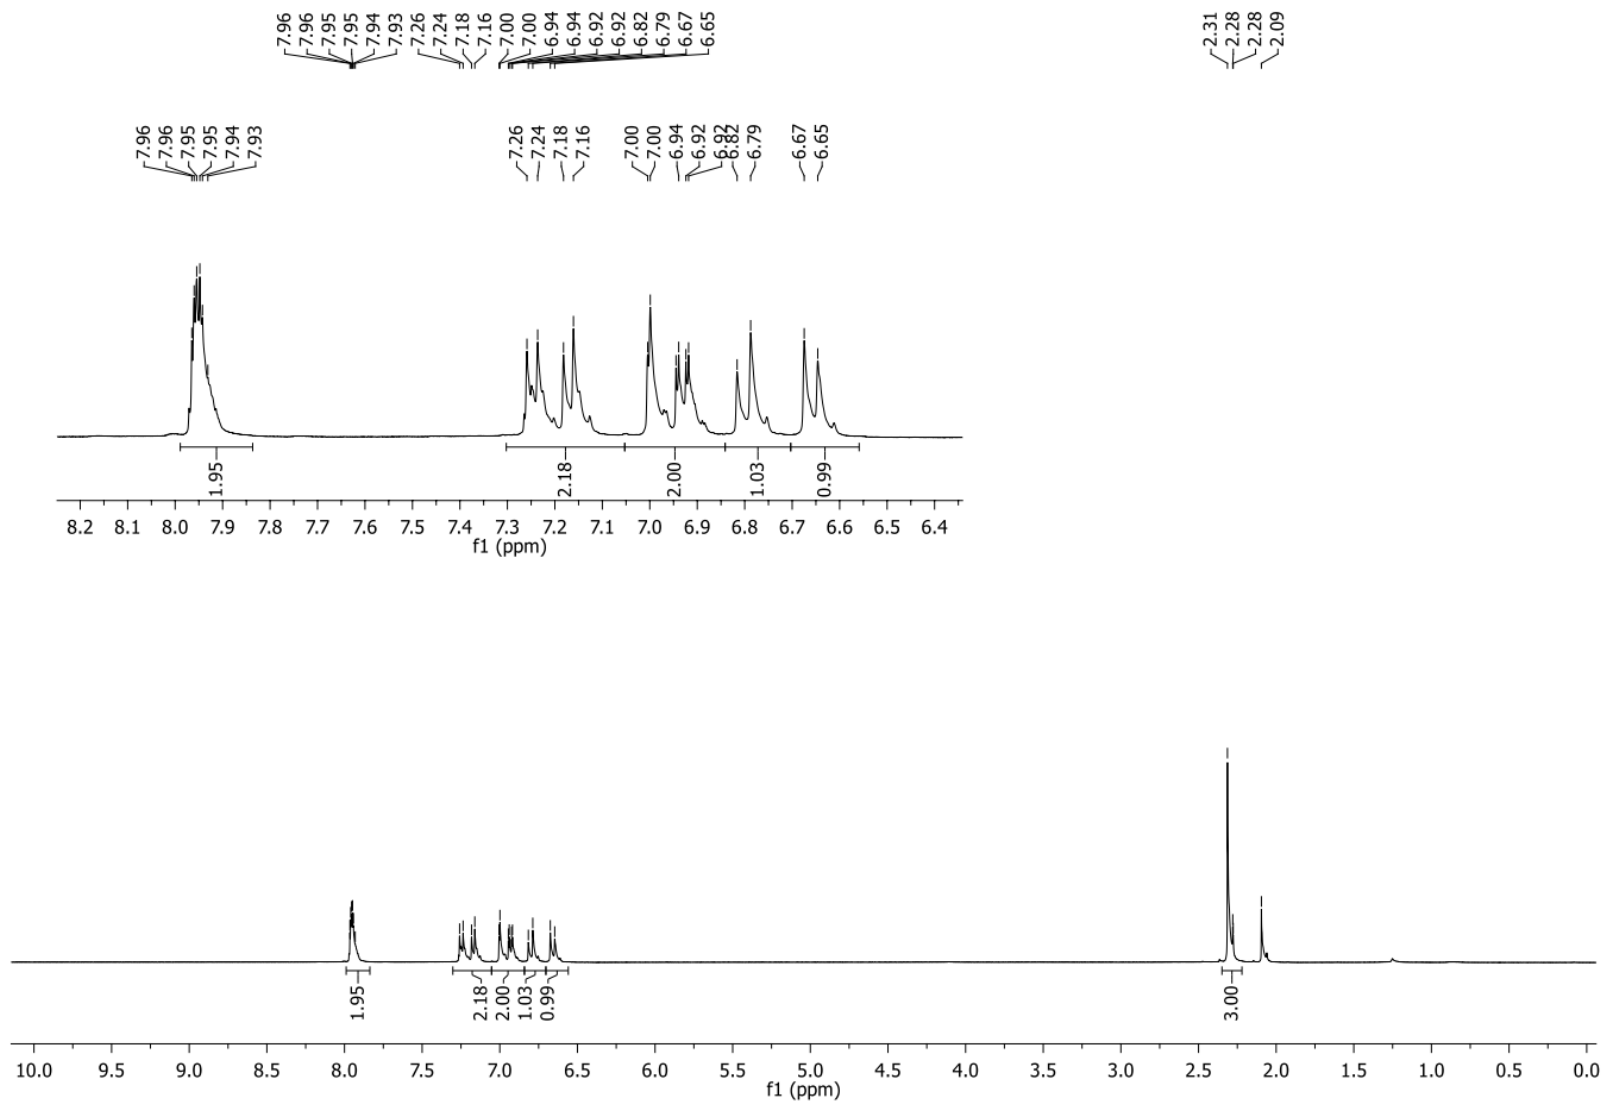

**Figure S35.** The  $^1\text{H}$  NMR of 7-nitrodibenzo[*b,f*]oxepin-3-yl acetate (**2j**).

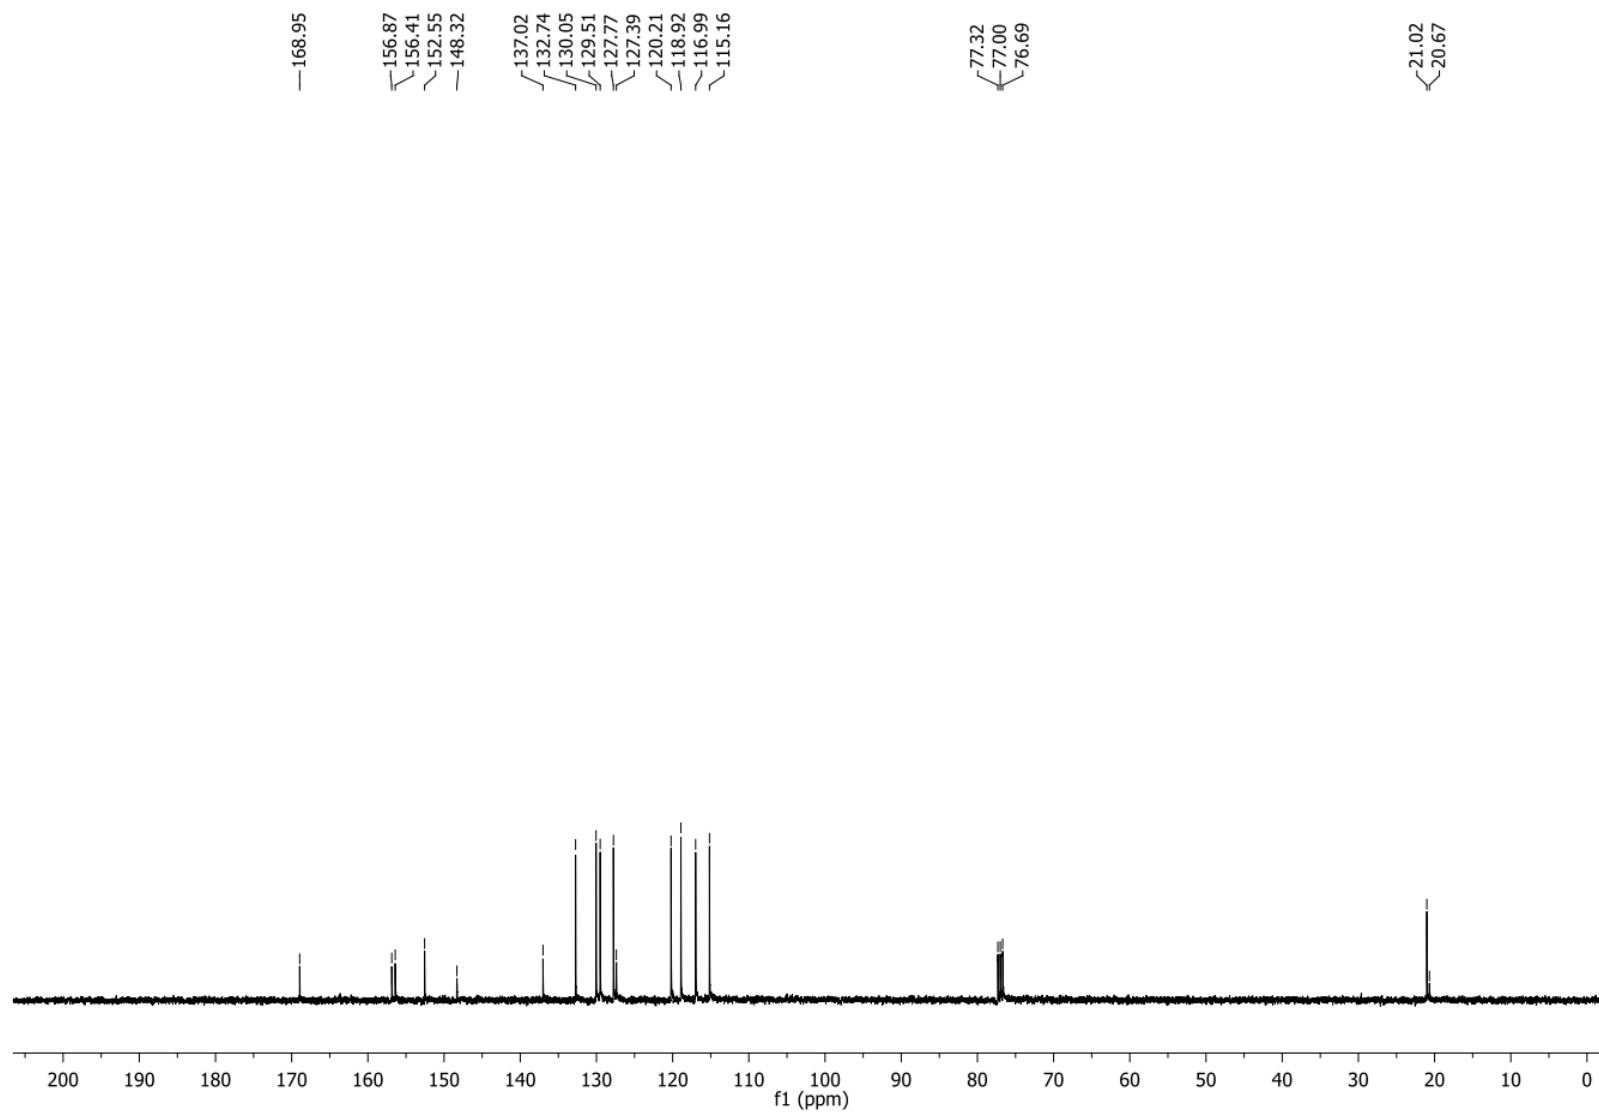

**Figure S36.** The <sup>13</sup>C NMR of 7-nitrodibenzo[*b,f*]oxepin-3-yl acetate (**2j**).

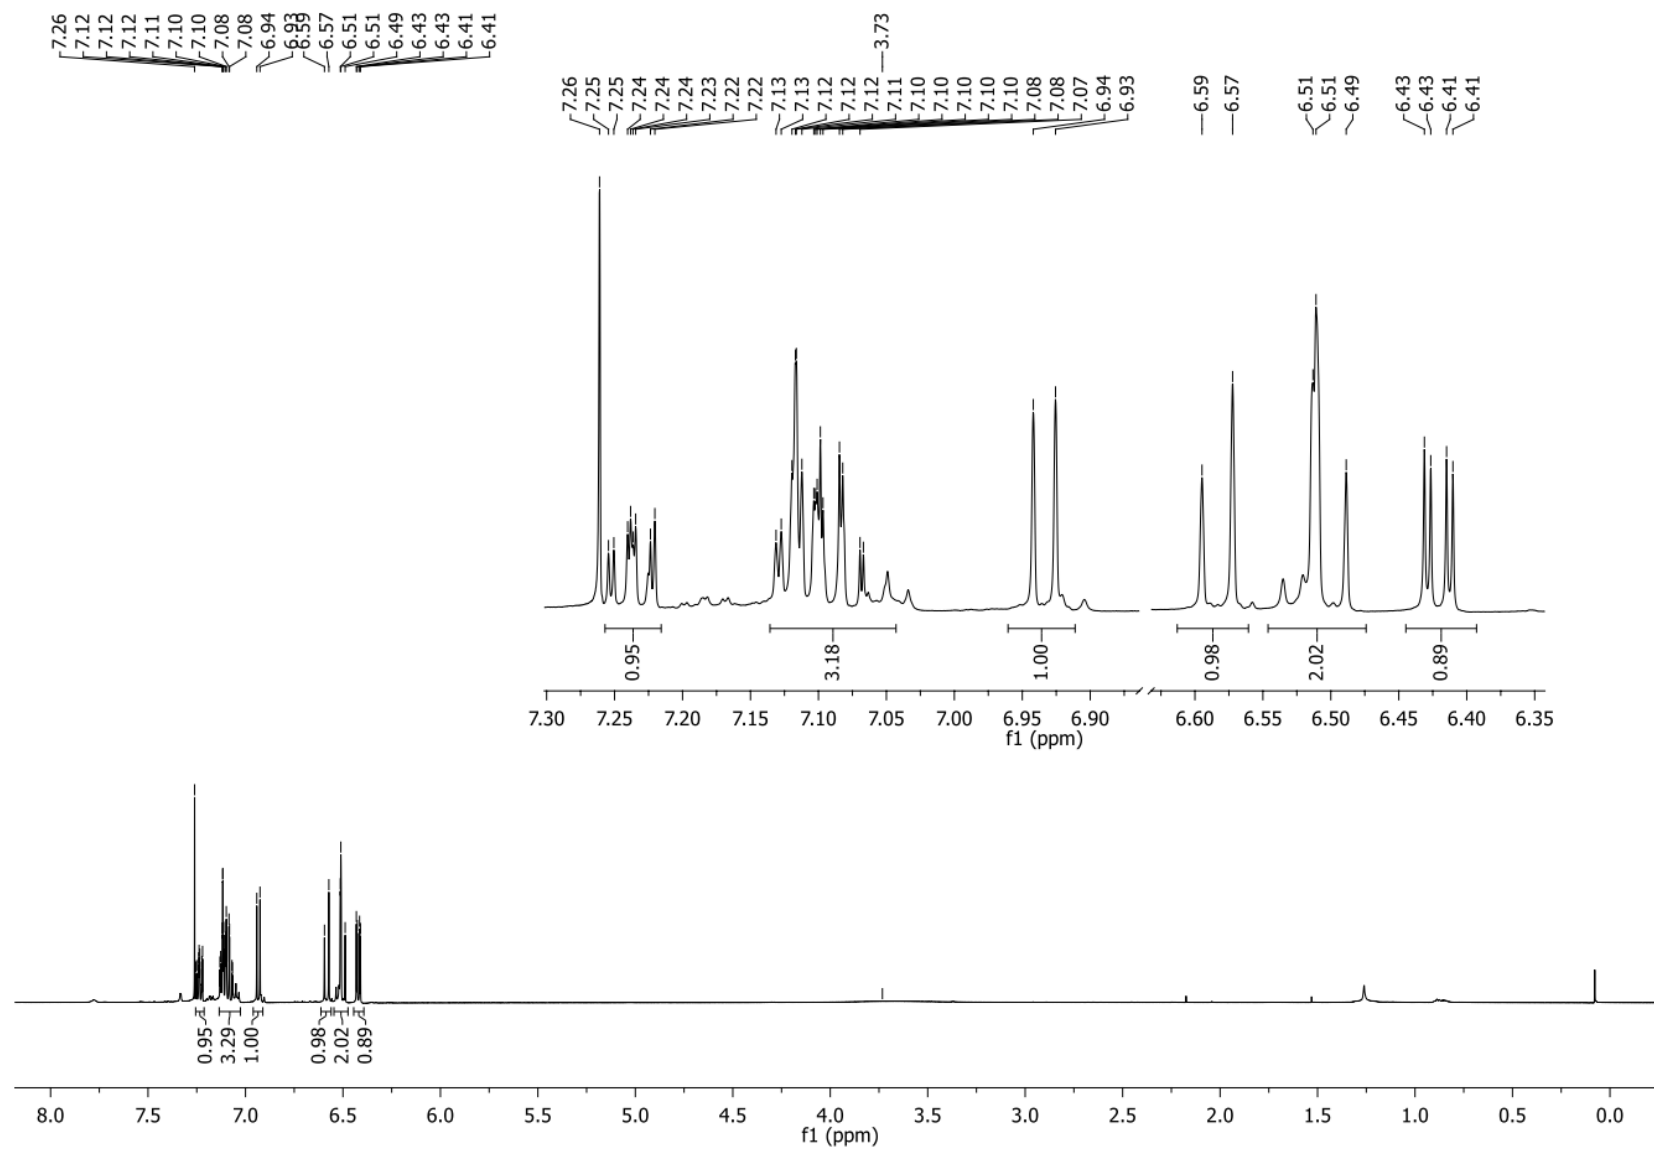

**Figure S37.** The  $^1\text{H}$  NMR of dibenzo[*b,f*]oxepin-3-amine (**3a**).

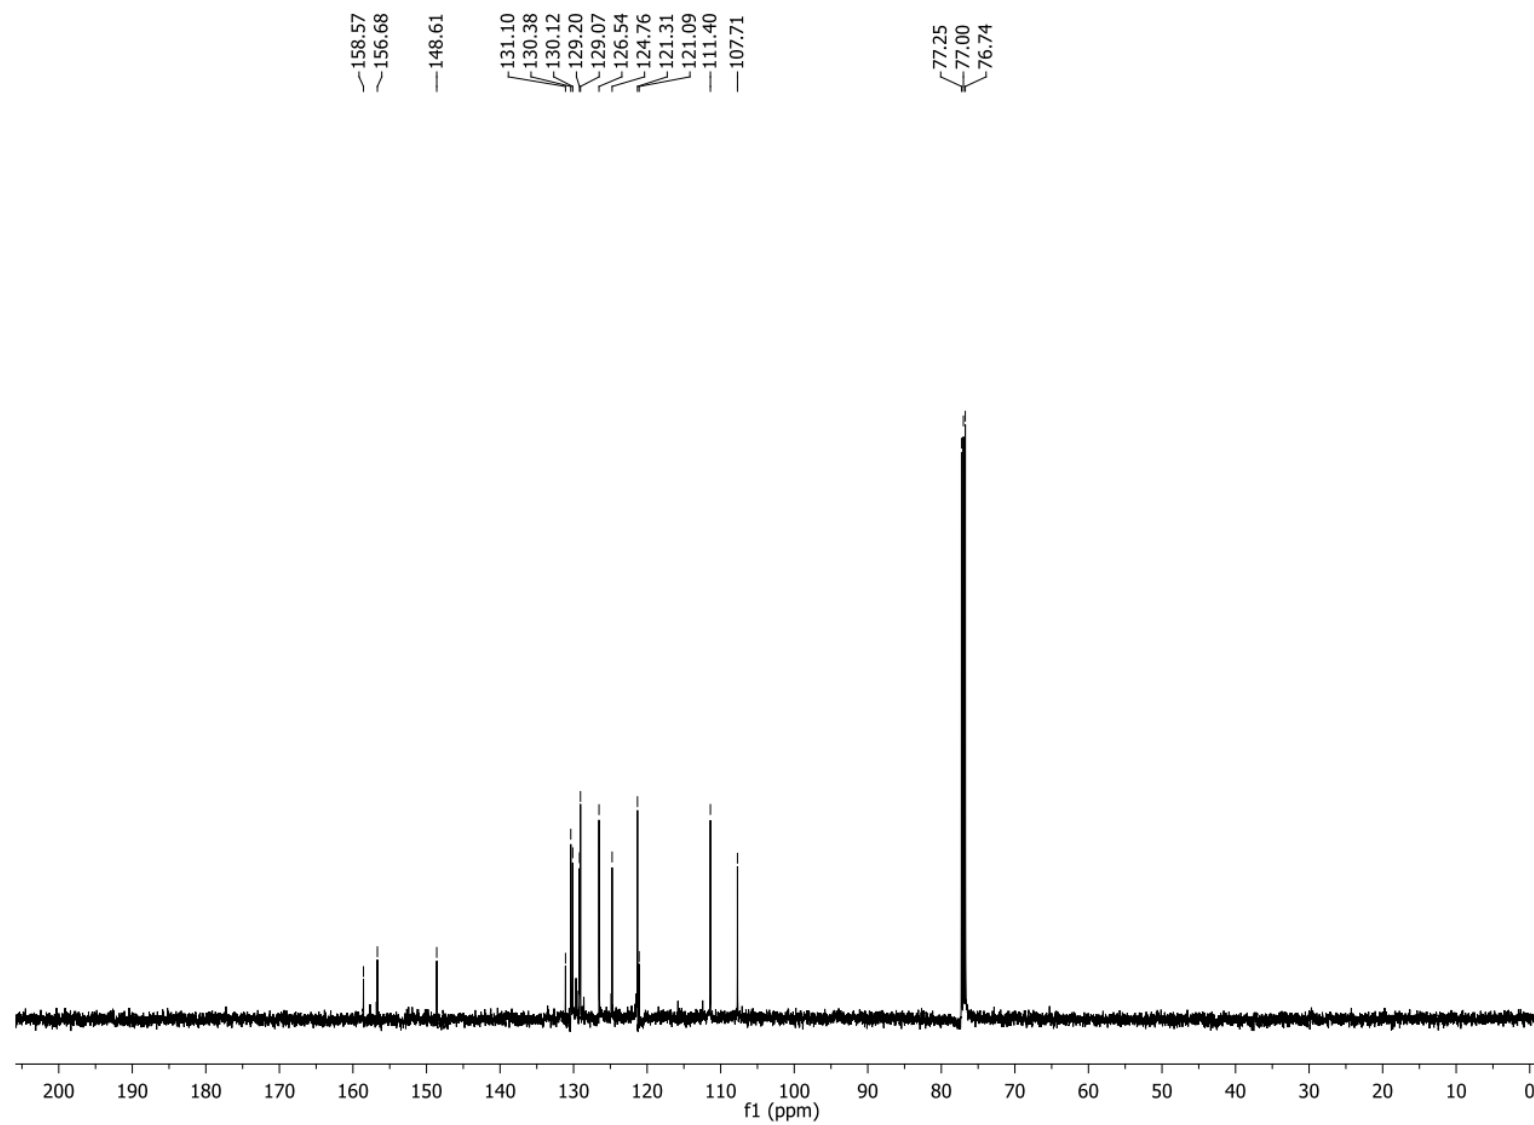

**Figure S38.** The  $^{13}\text{C}$  NMR of dibenzo[*b,f*]oxepin-3-amine (**3a**).

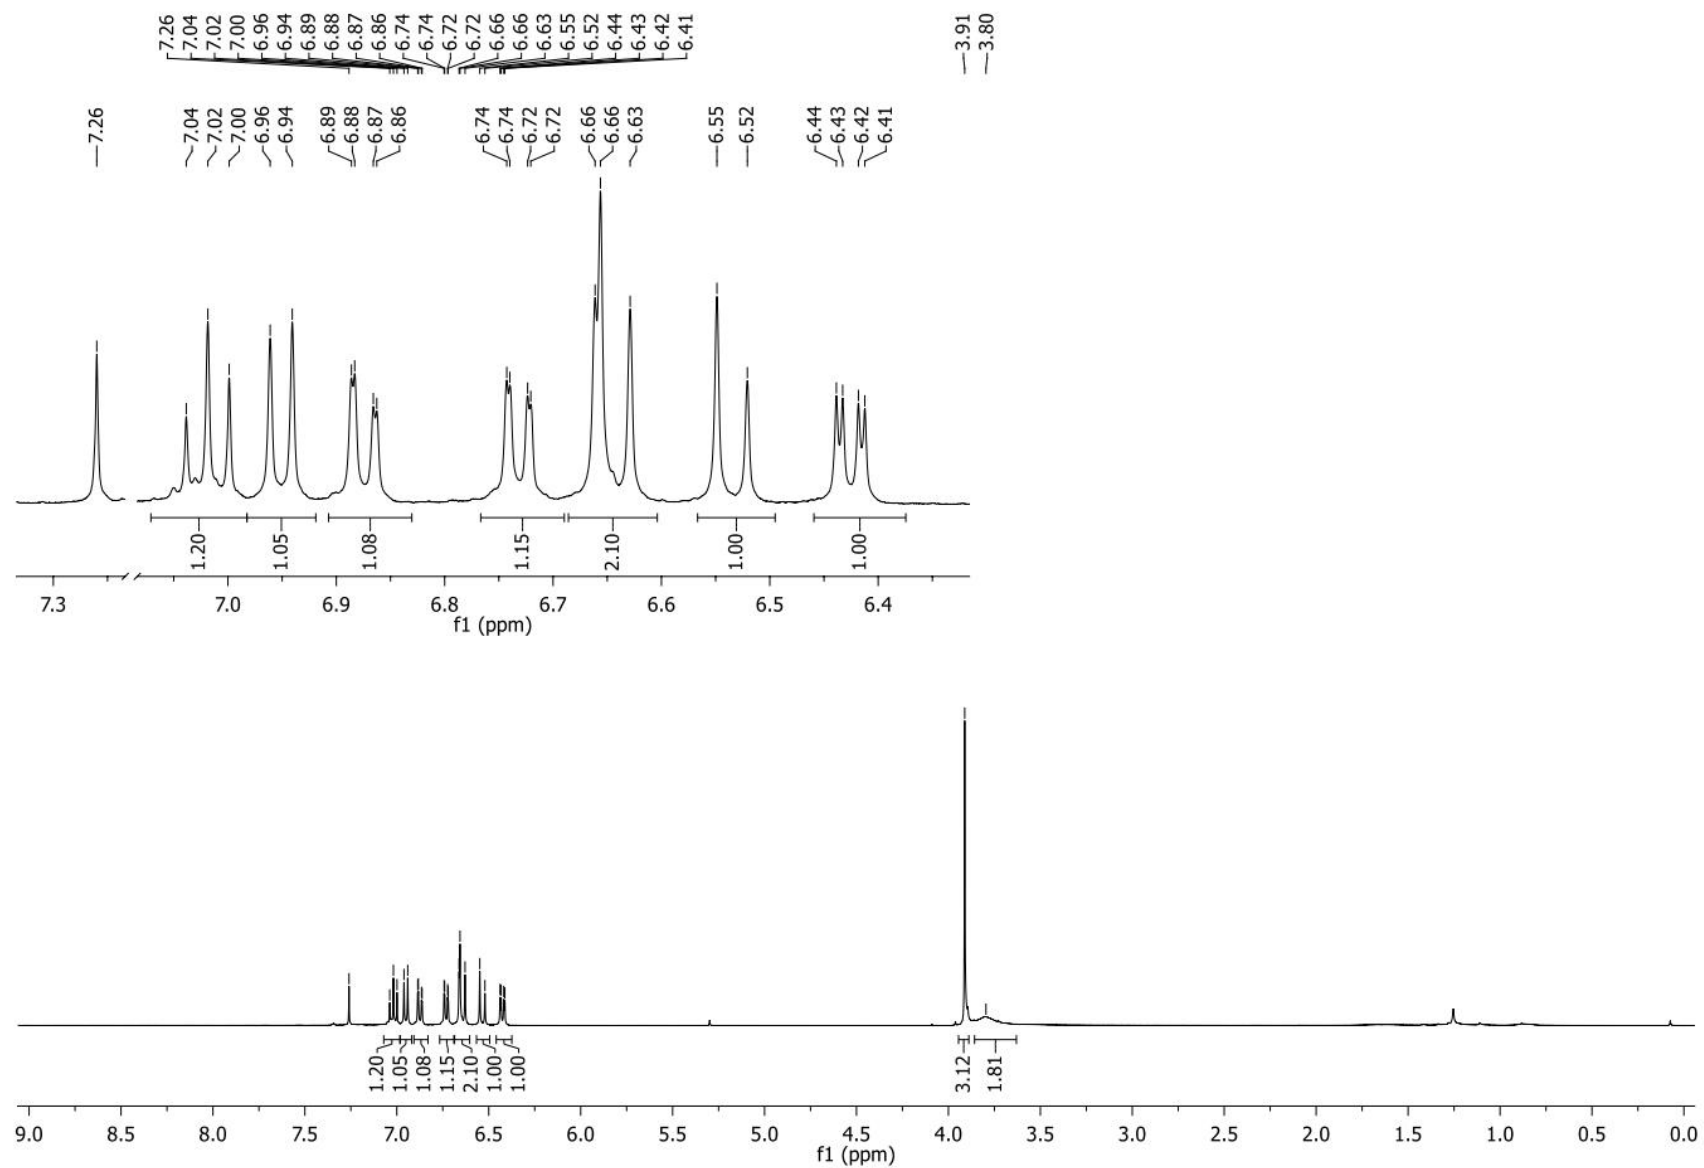

**Figure S39.** The  $^1\text{H}$  NMR of 6-methoxydibenzo[*b,f*]oxepin-3-amine (**3b**).



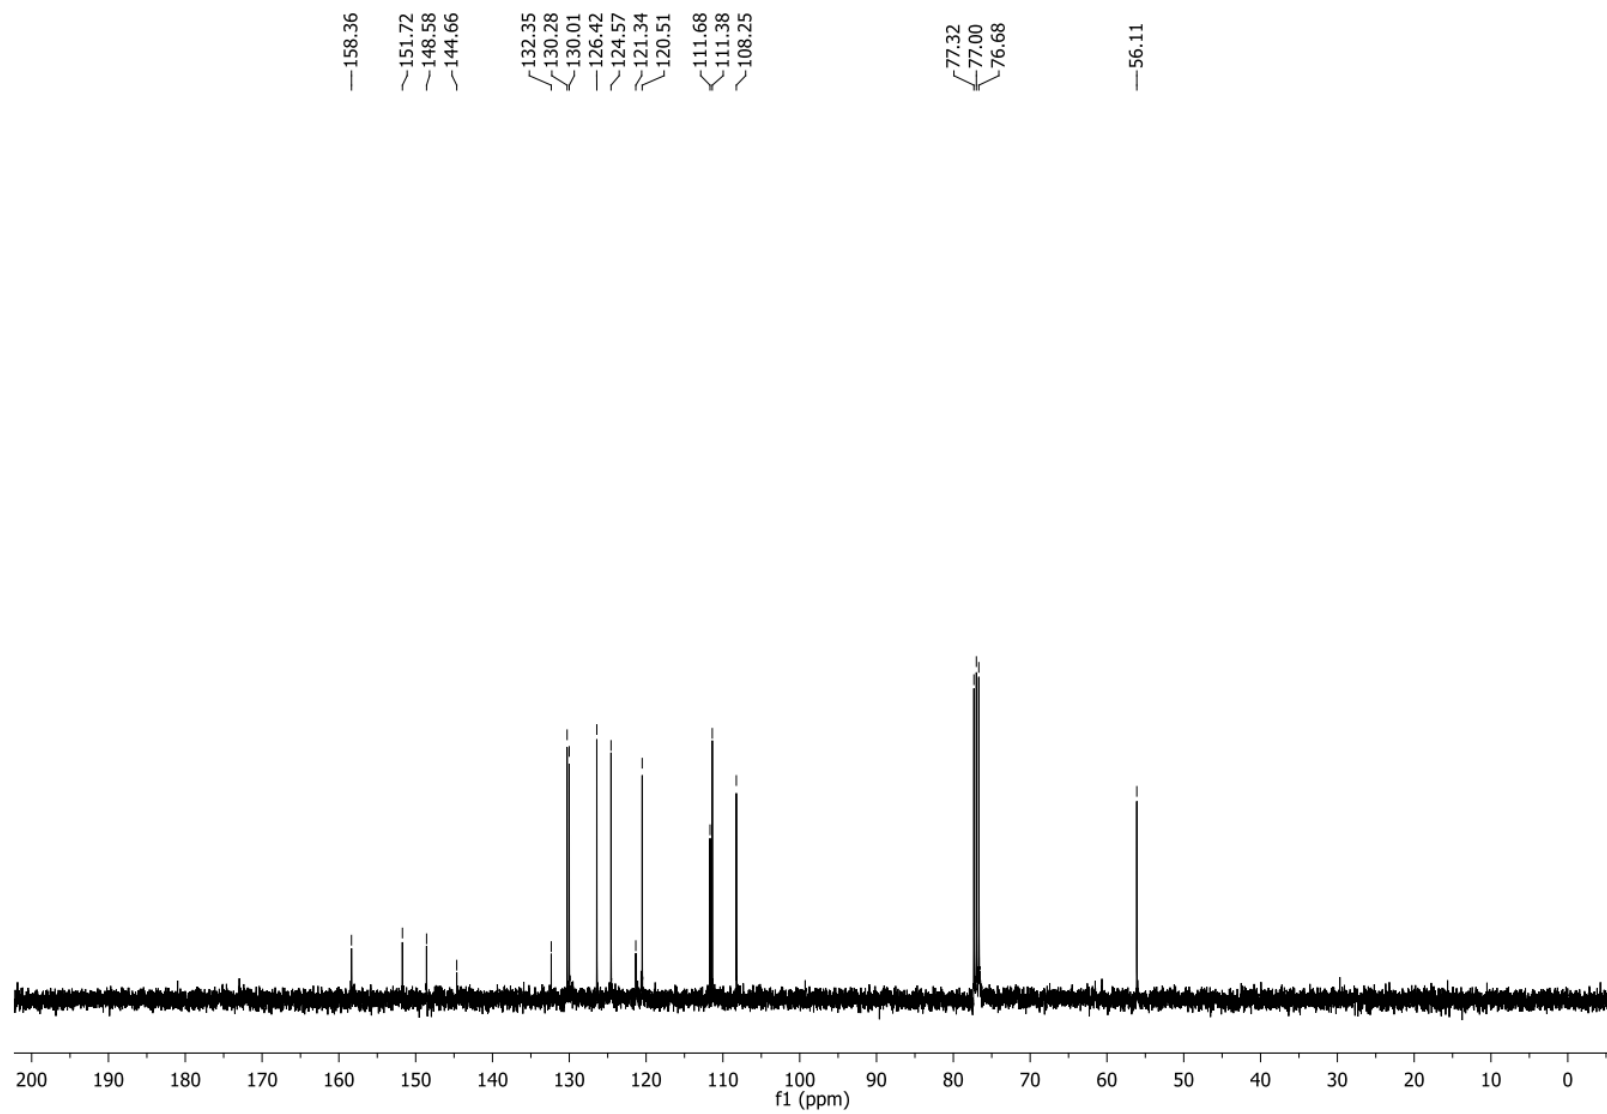

**Figure S40.** The <sup>13</sup>C NMR of 6-methoxydibenzo[*b,f*]oxepin-3-amine (**3b**).

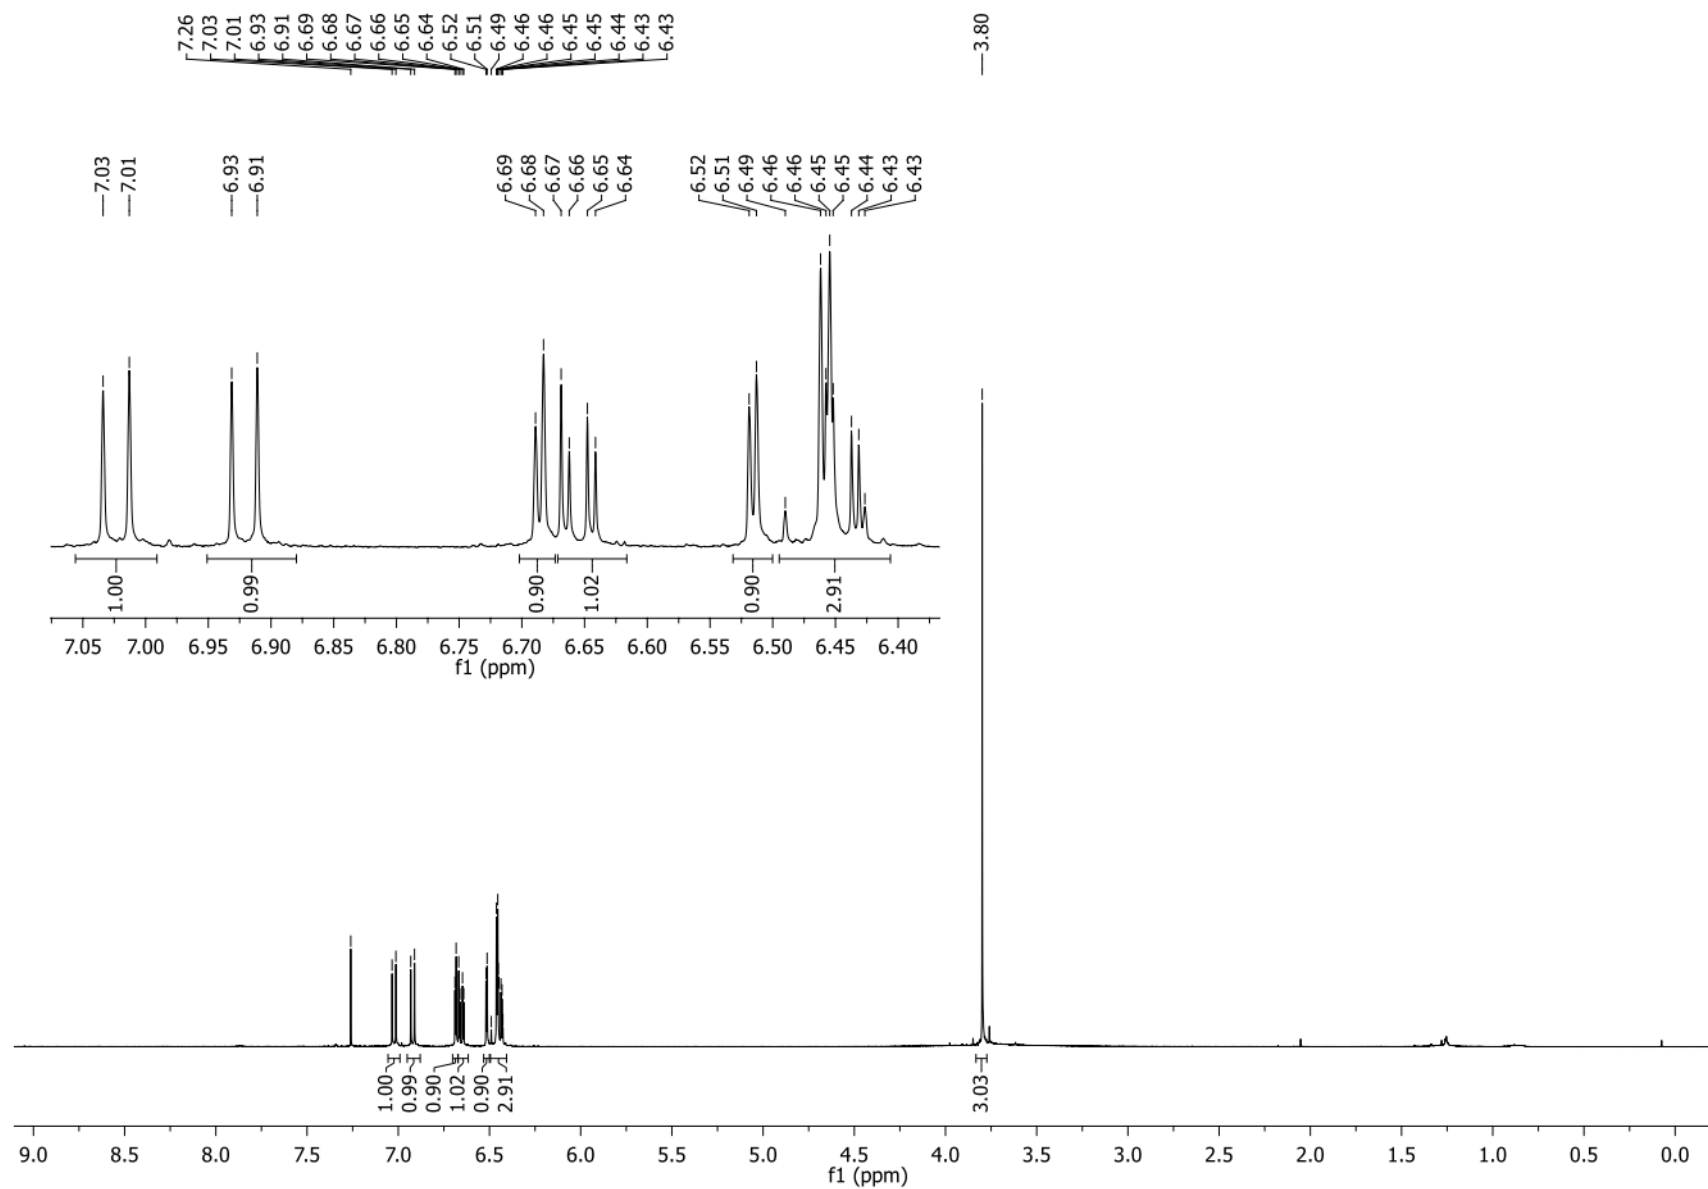

**Figure S41.** The  $^1\text{H}$  NMR of 7-methoxydibenzo[*b,f*]oxepin-3-amine (**3c**).

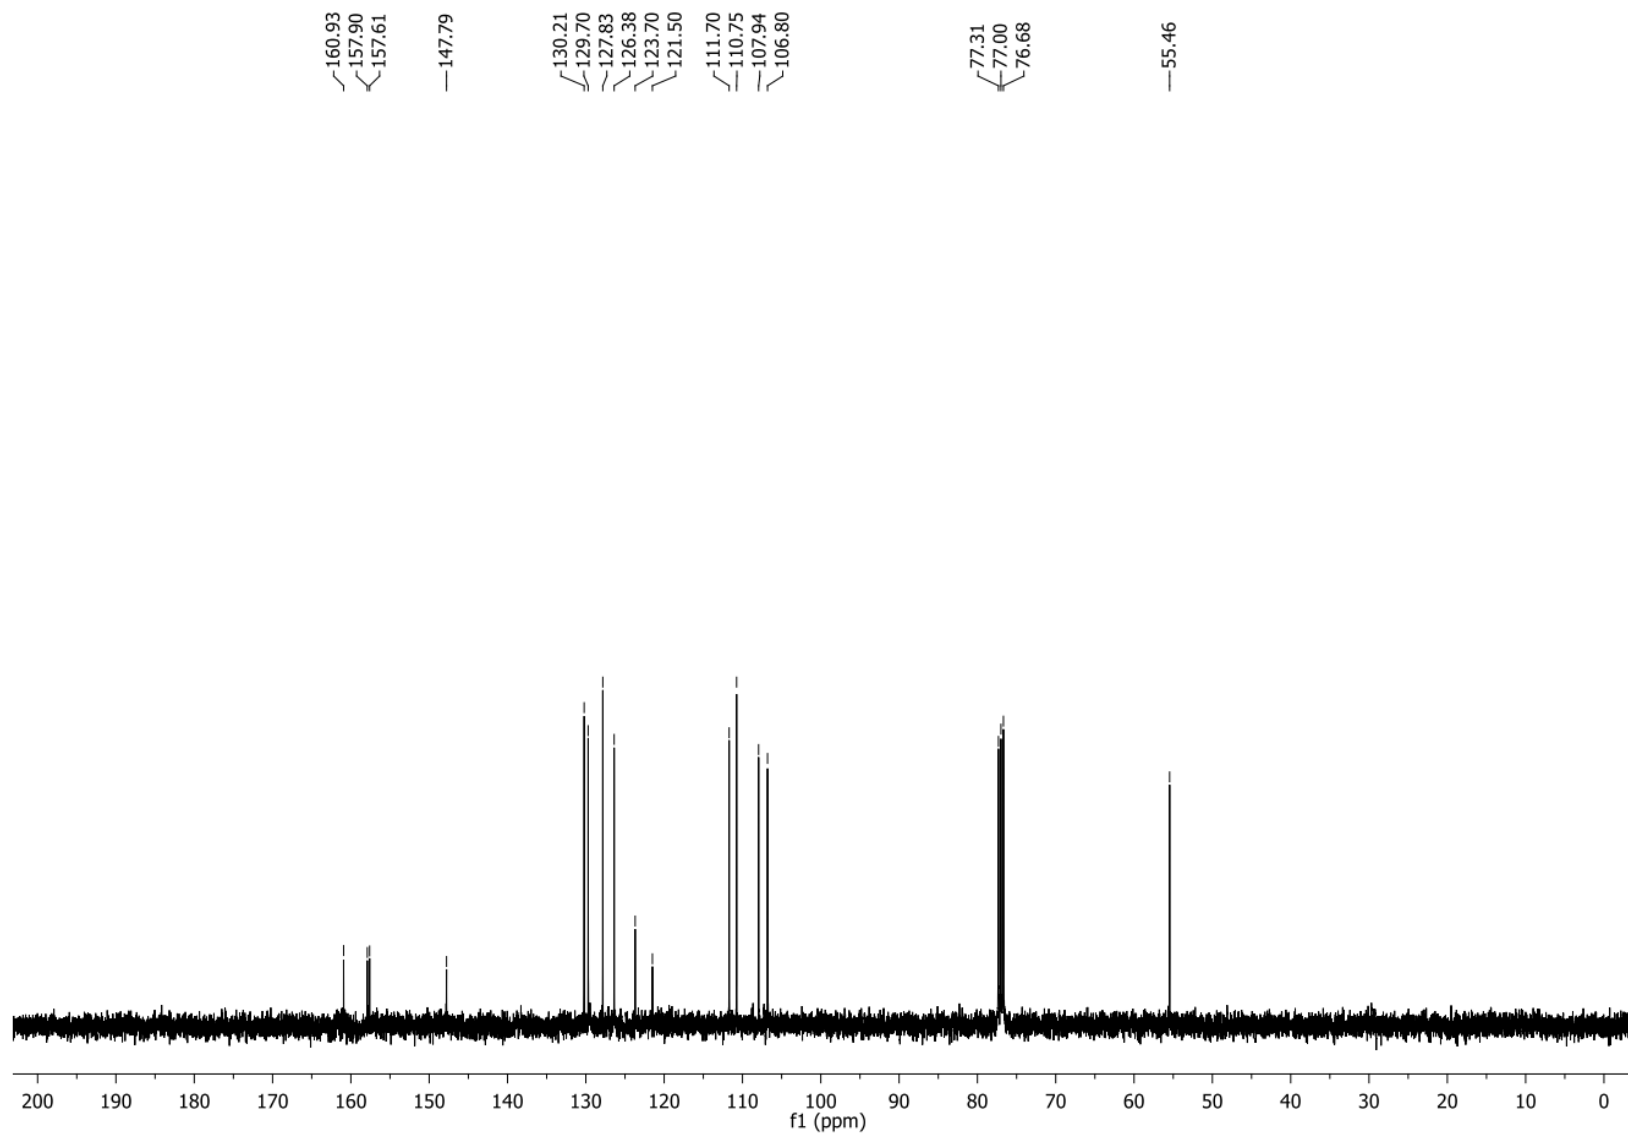

**Figure S42.** The <sup>13</sup>C NMR of 7-methoxydibenzo[*b,f*]oxepin-3-amine (**3c**).

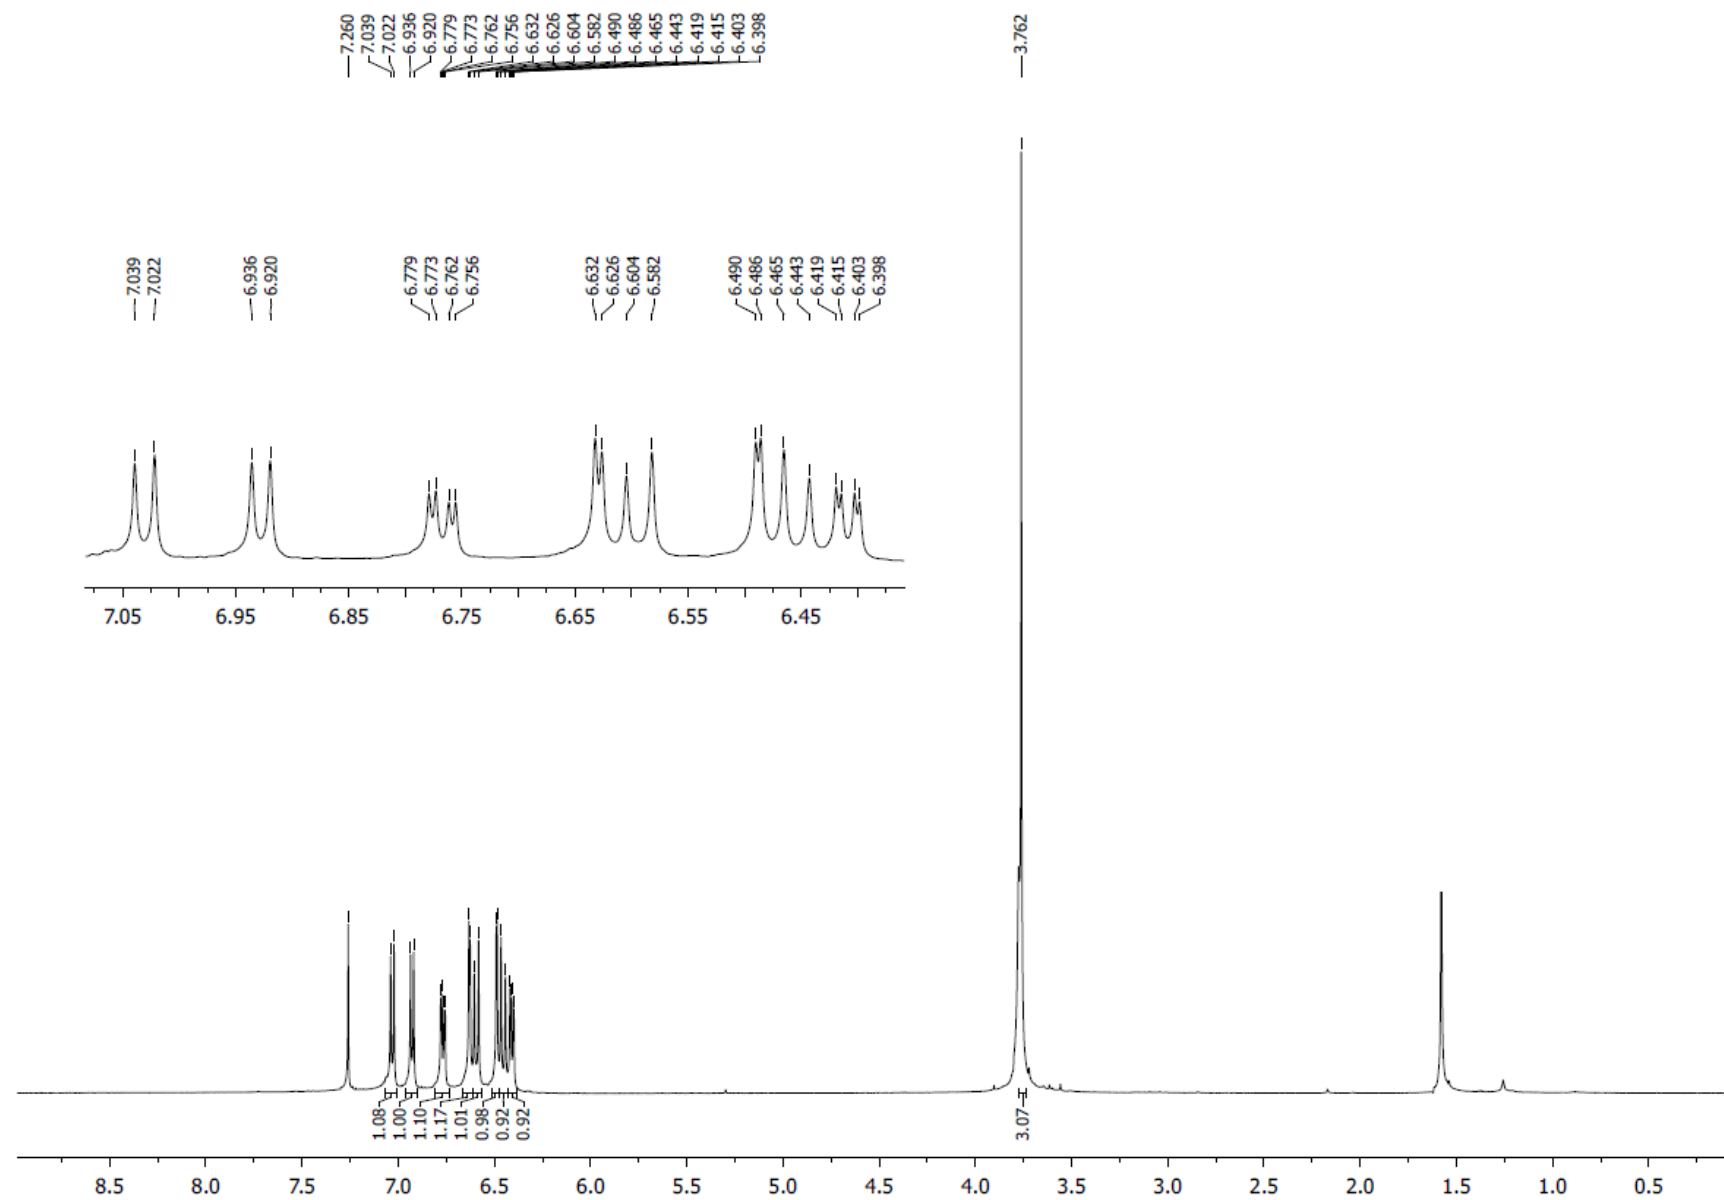

**Figure S43.** The  $^1\text{H}$  NMR of 8-methoxydibenzo[*b,f*]oxepin-3-amine (**3d**).

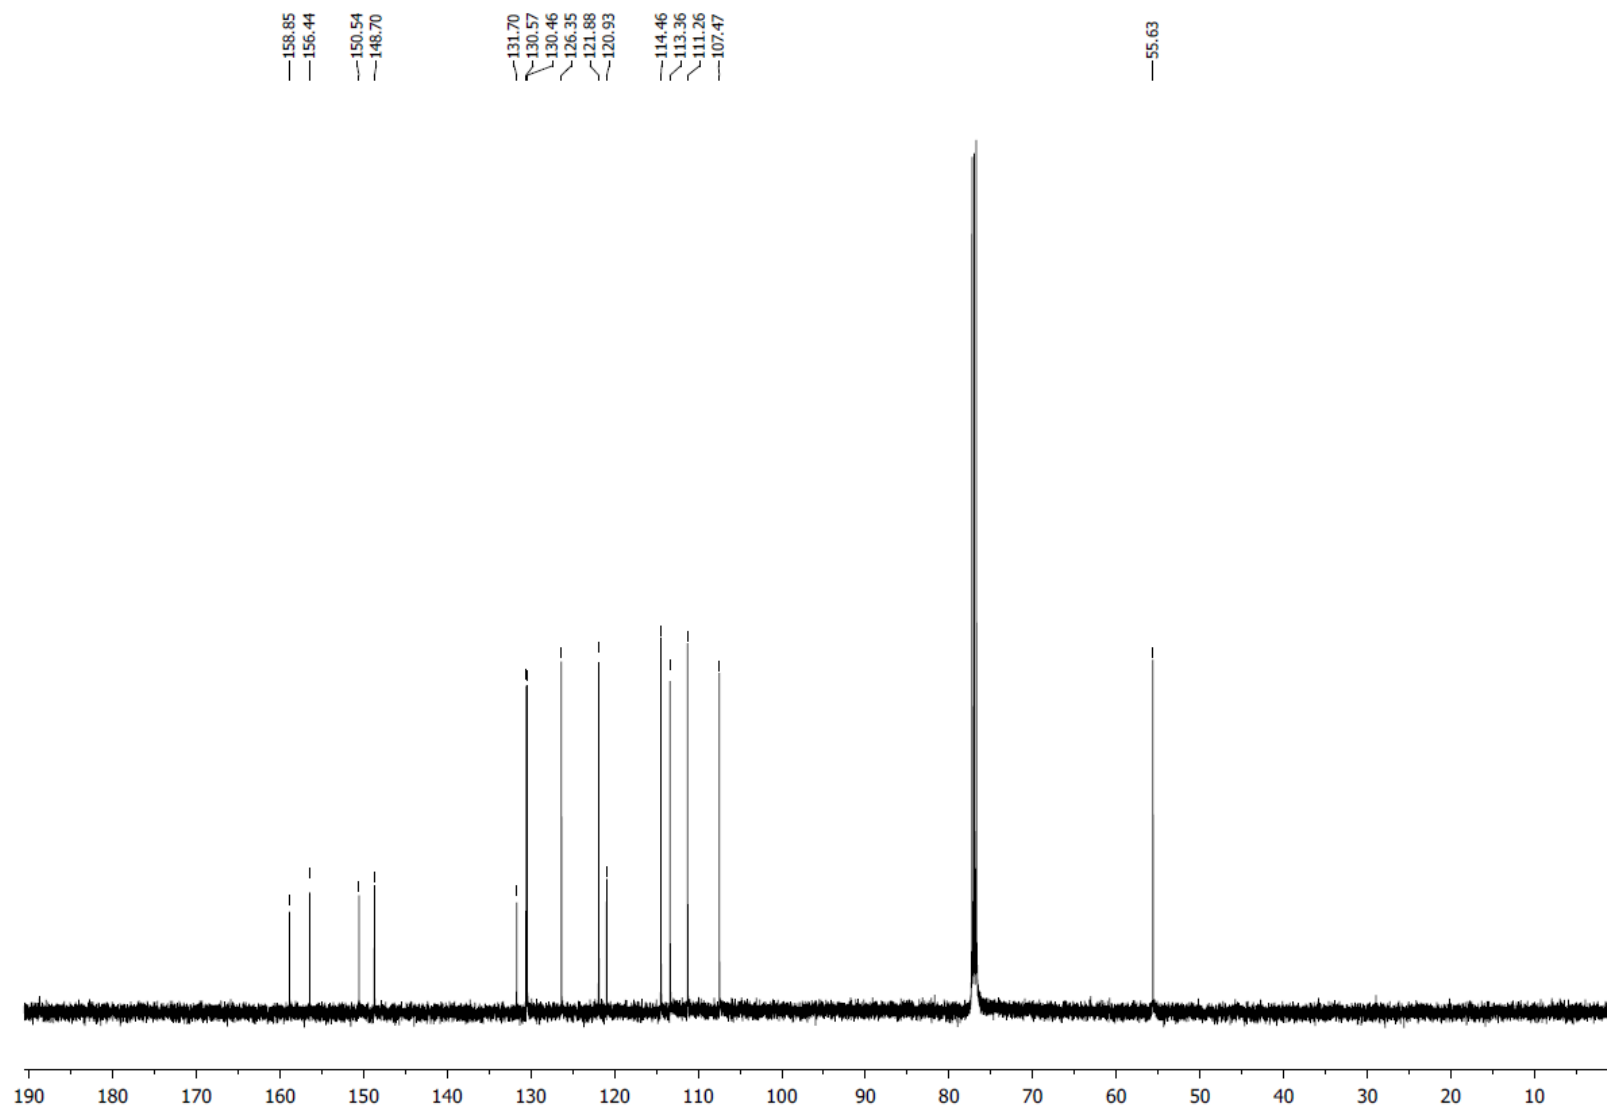

**Figure S44.** The  $^{13}\text{C}$  NMR of 8-methoxydibenzo[*b,f*]oxepin-3-amine (3d).

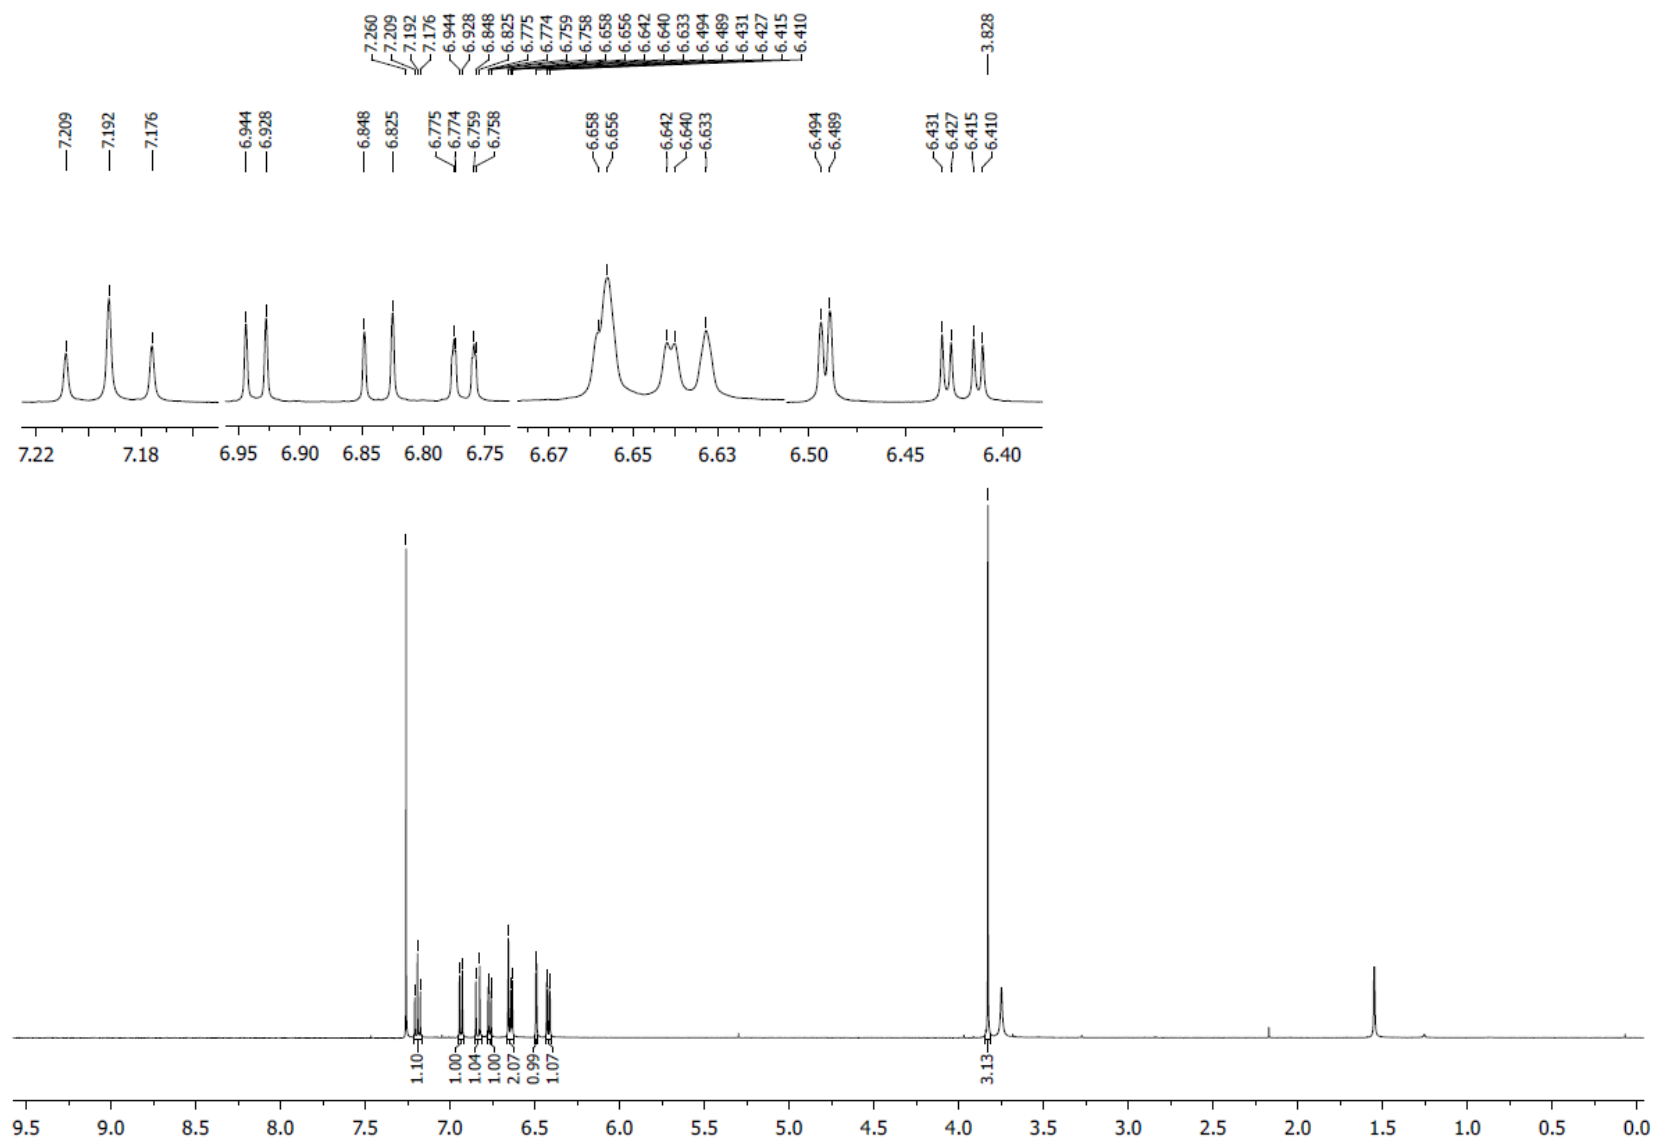

**Figure S45.** The  $^1\text{H}$  NMR of 9-methoxydibenzo[*b,f*]oxepin-3-amine (**3e**).

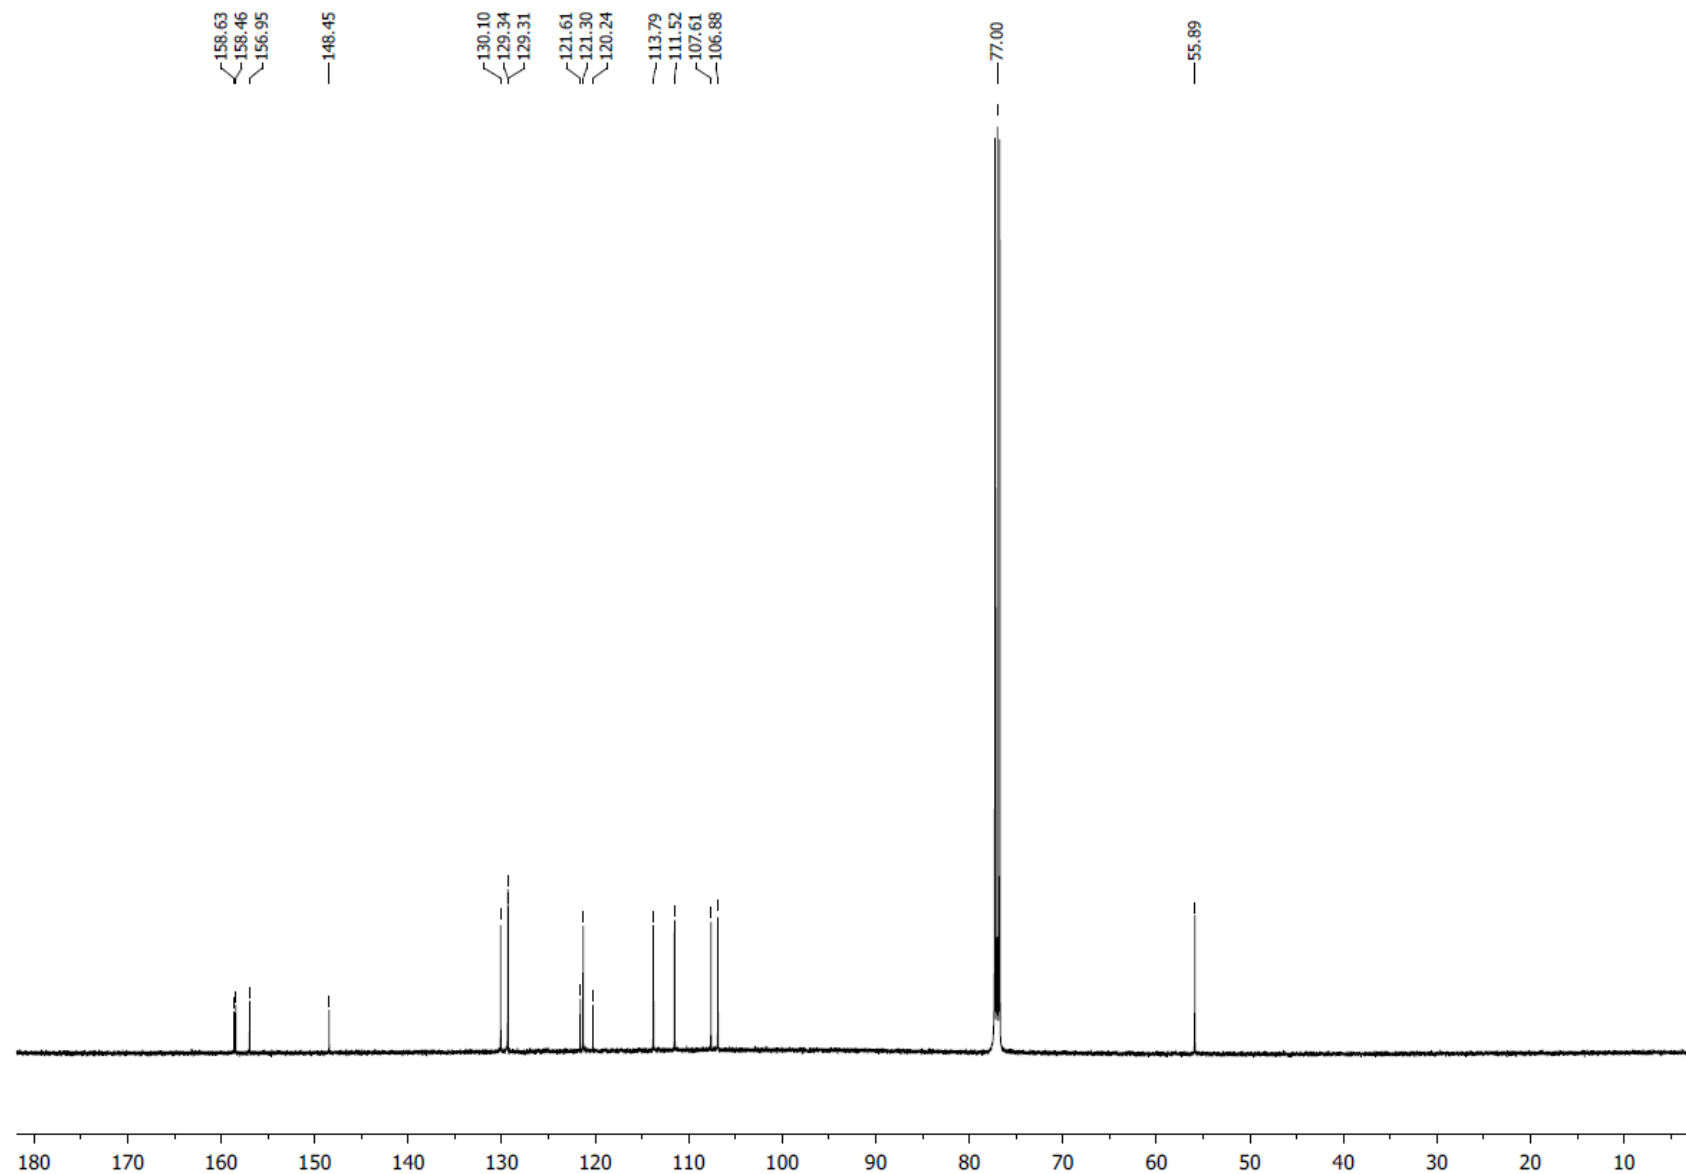

**Figure S46.** The <sup>13</sup>C NMR of 9-methoxydibenzo[*b,f*]oxepin-3-amine (**3e**).

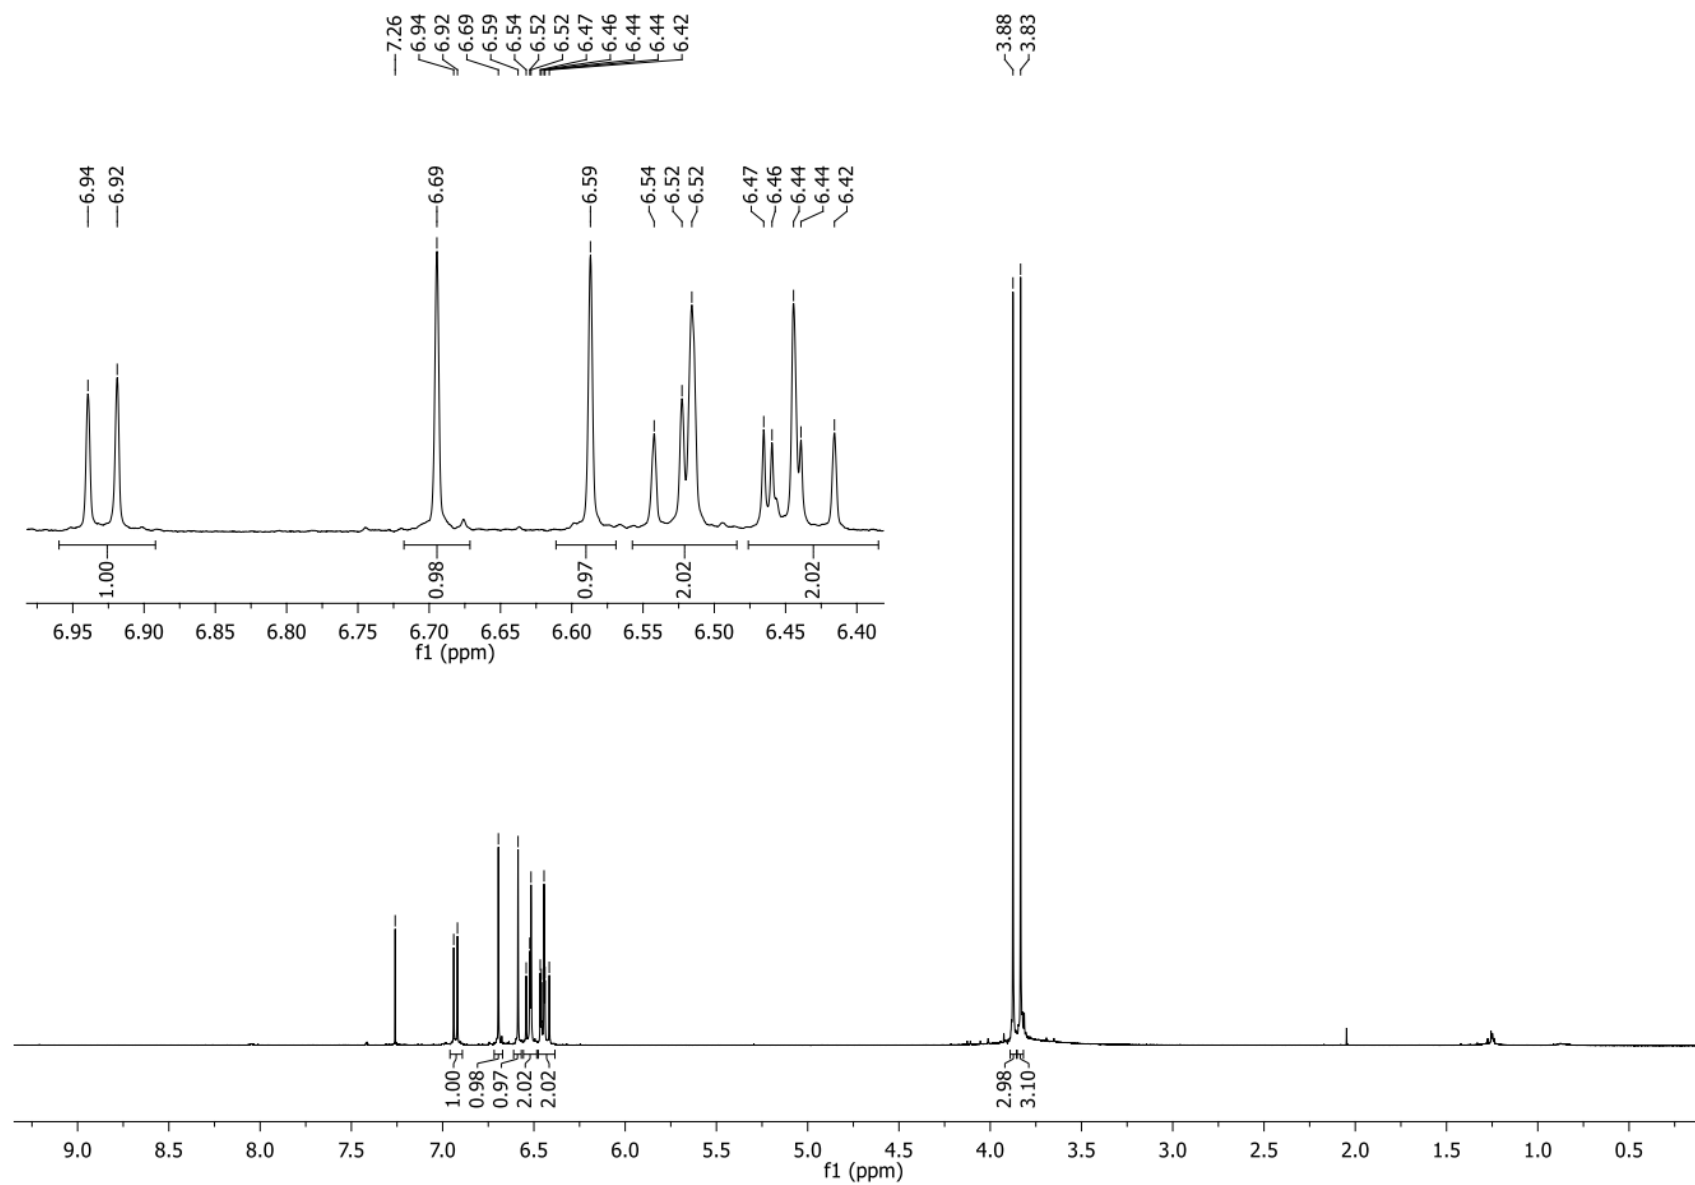

**Figure S47.** The  $^1\text{H}$  NMR of 7,8-dimethoxydibenzo[*b,f*]oxepin-3-amine (**3f**).



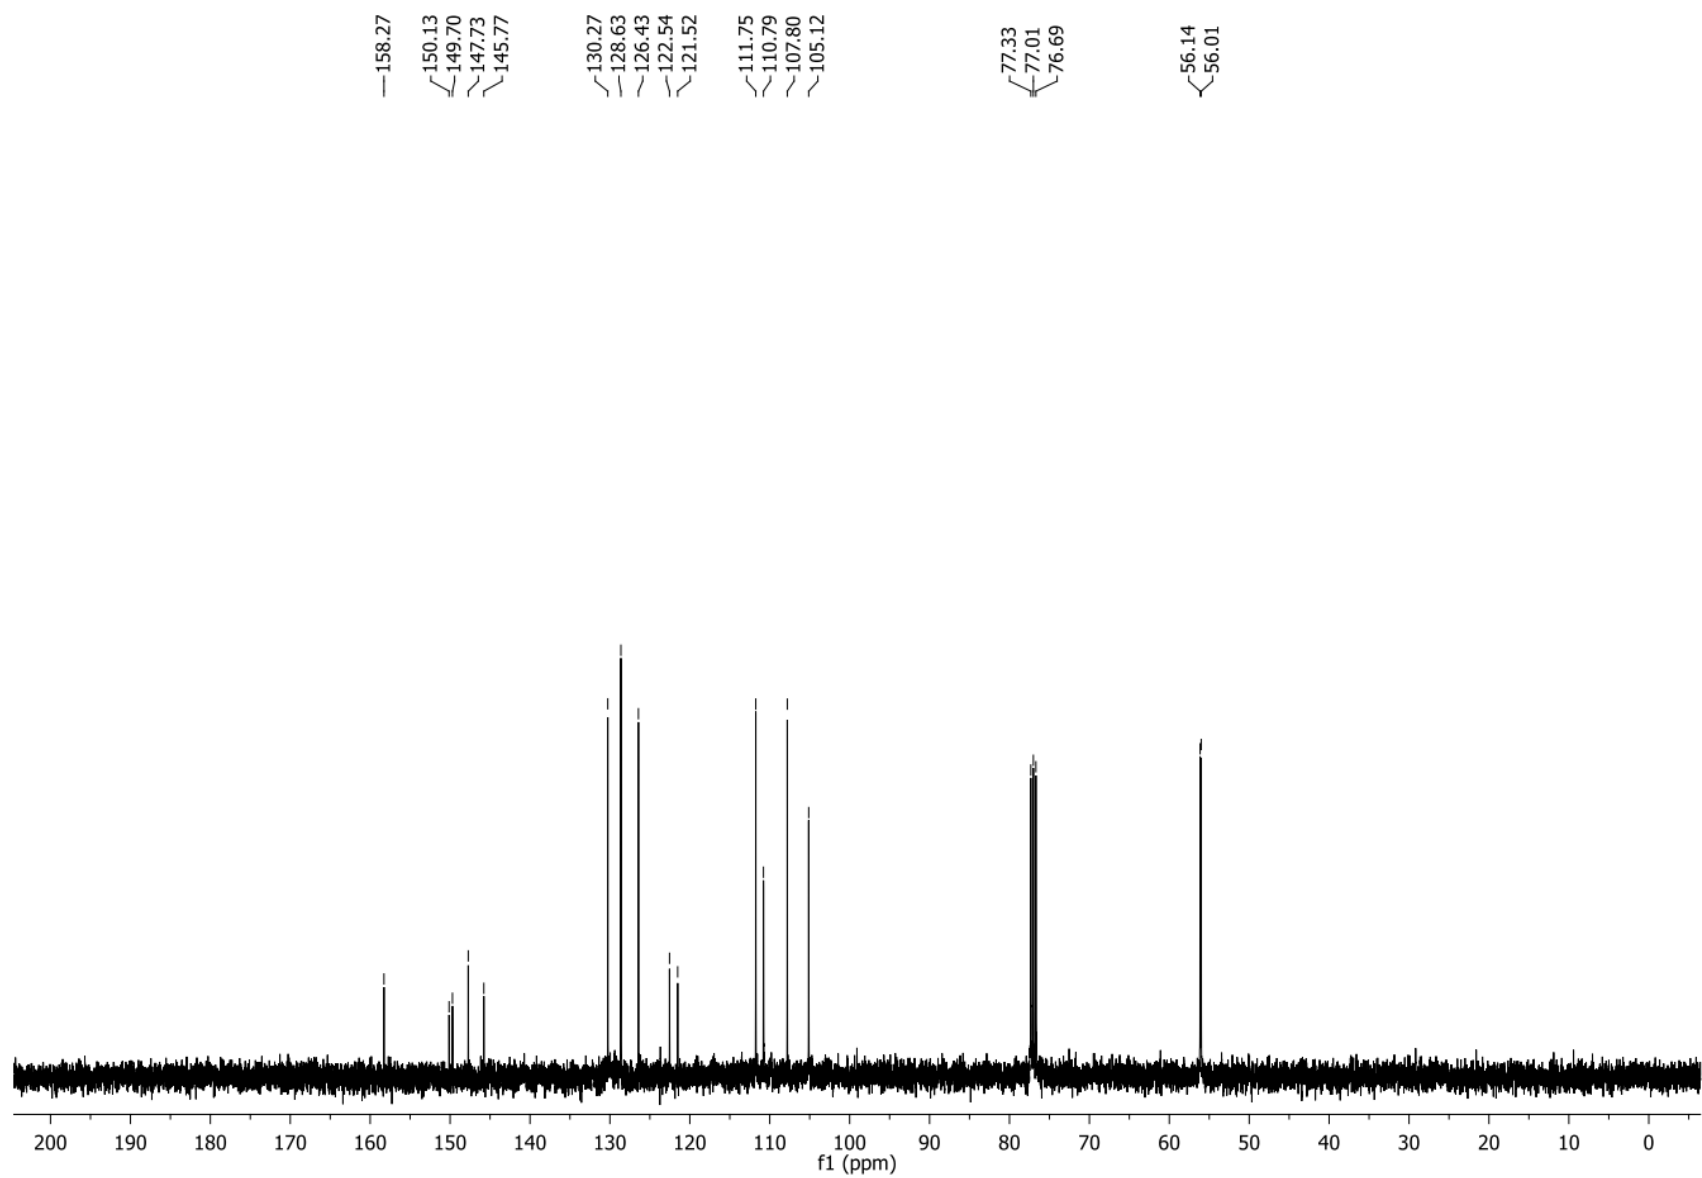

**Figure S48.** The  $^{13}\text{C}$  NMR of 7,8-dimethoxydibenzo[*b,f*]oxepin-3-amine (**3f**).

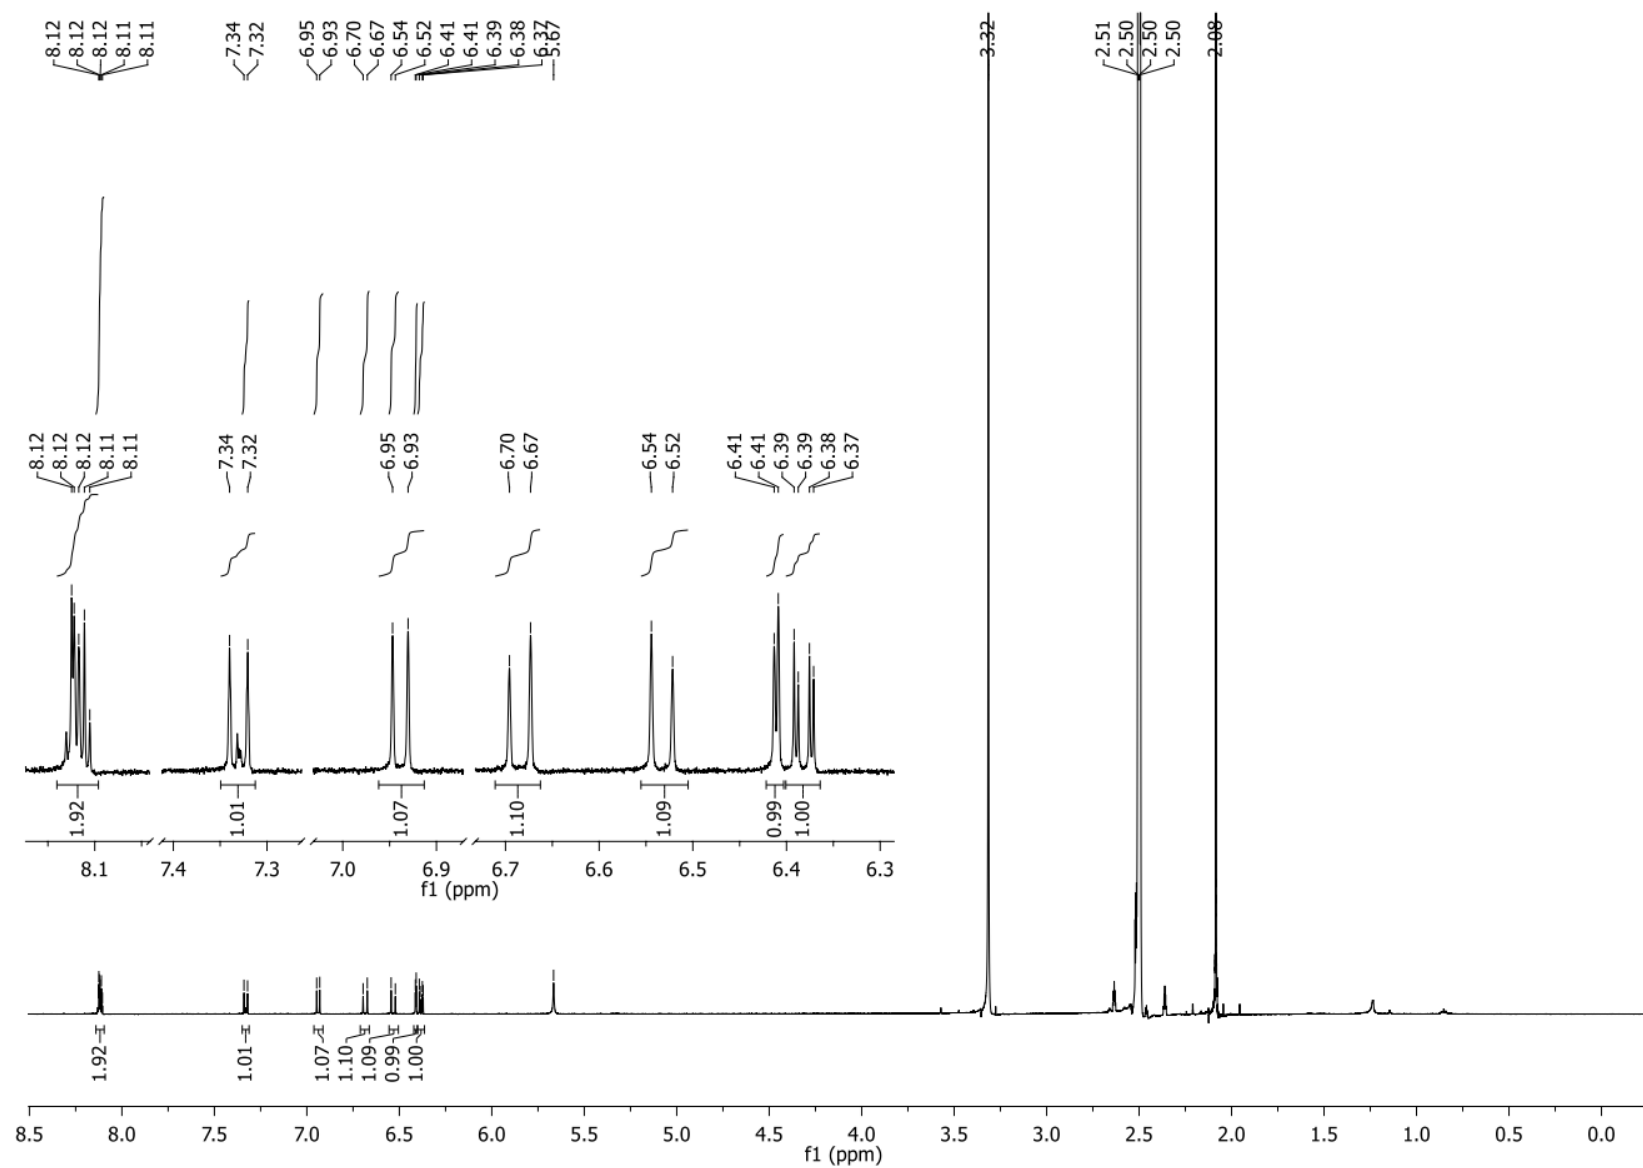

**Figure S49.** The <sup>1</sup>H NMR of 8-nitrodibenzo[*b,f*]oxepin-3-amine (**3g**).

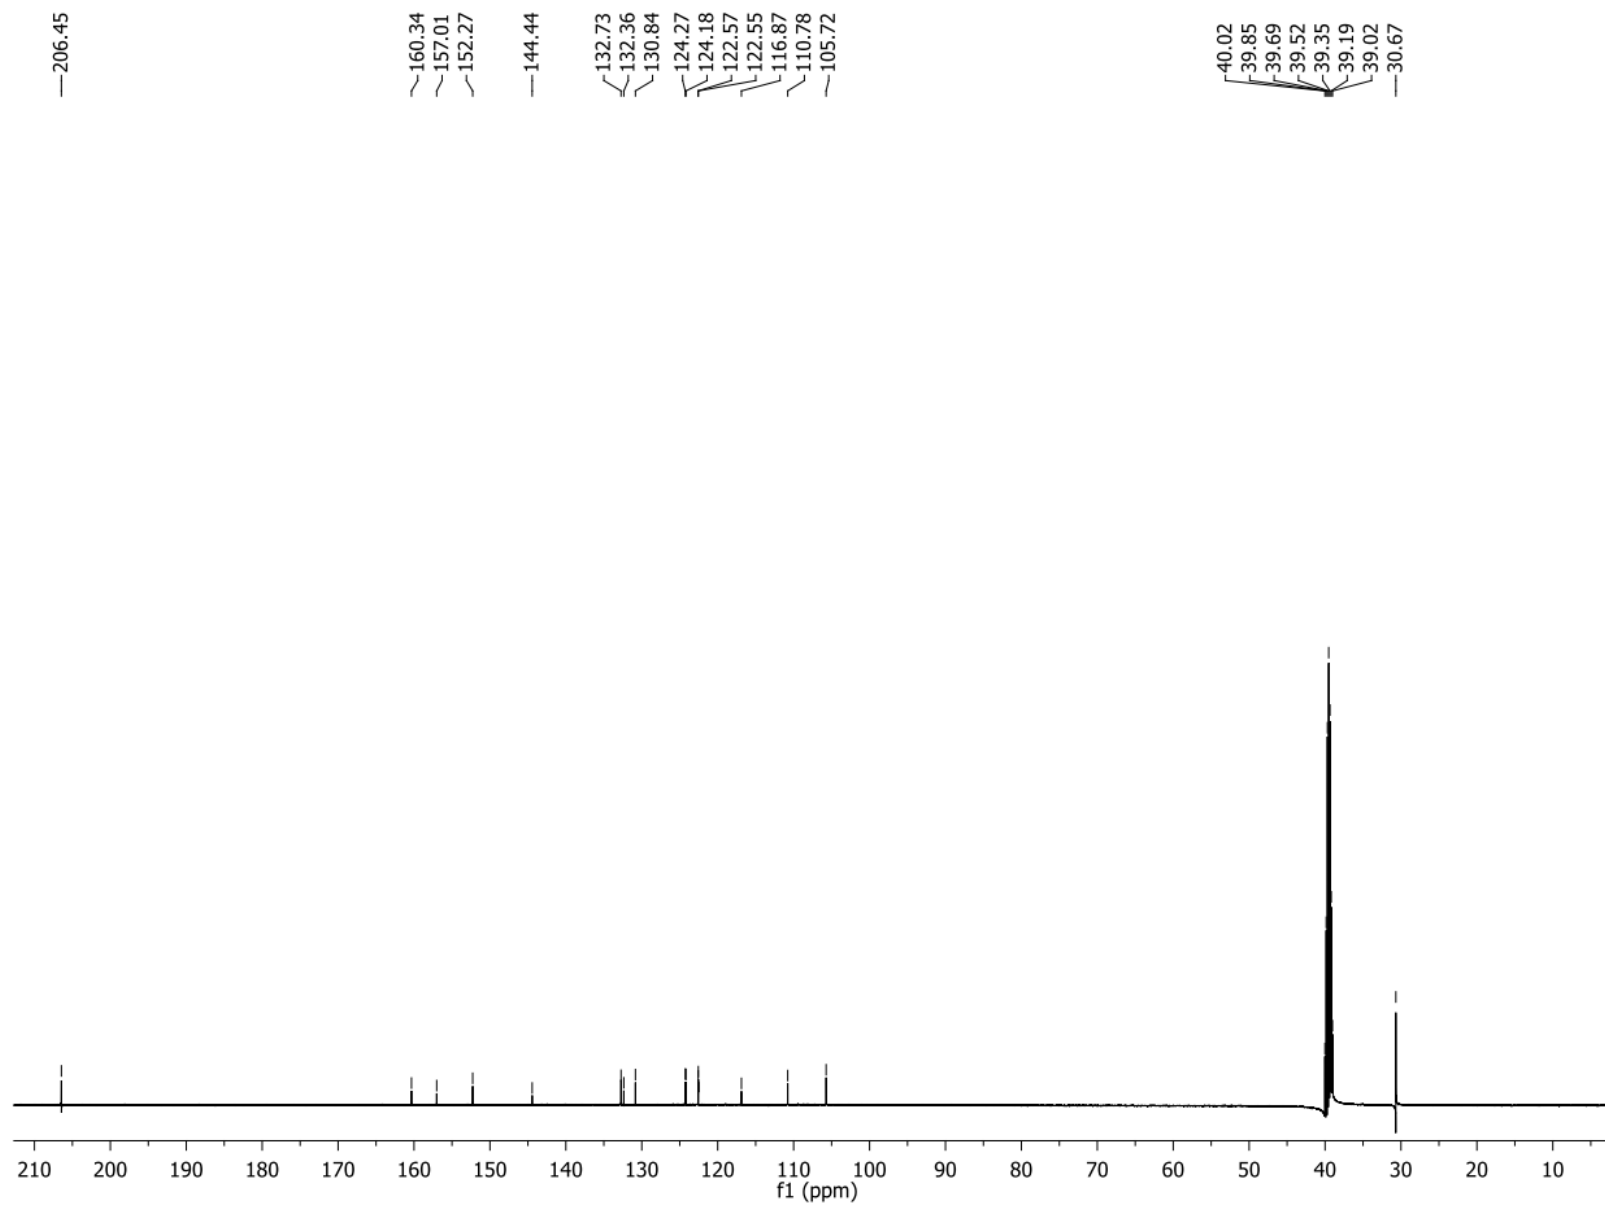

**Figure S50.** The <sup>13</sup>C NMR of 8-nitrodibenzo[*b,f*]oxepin-3-amine (**3g**).

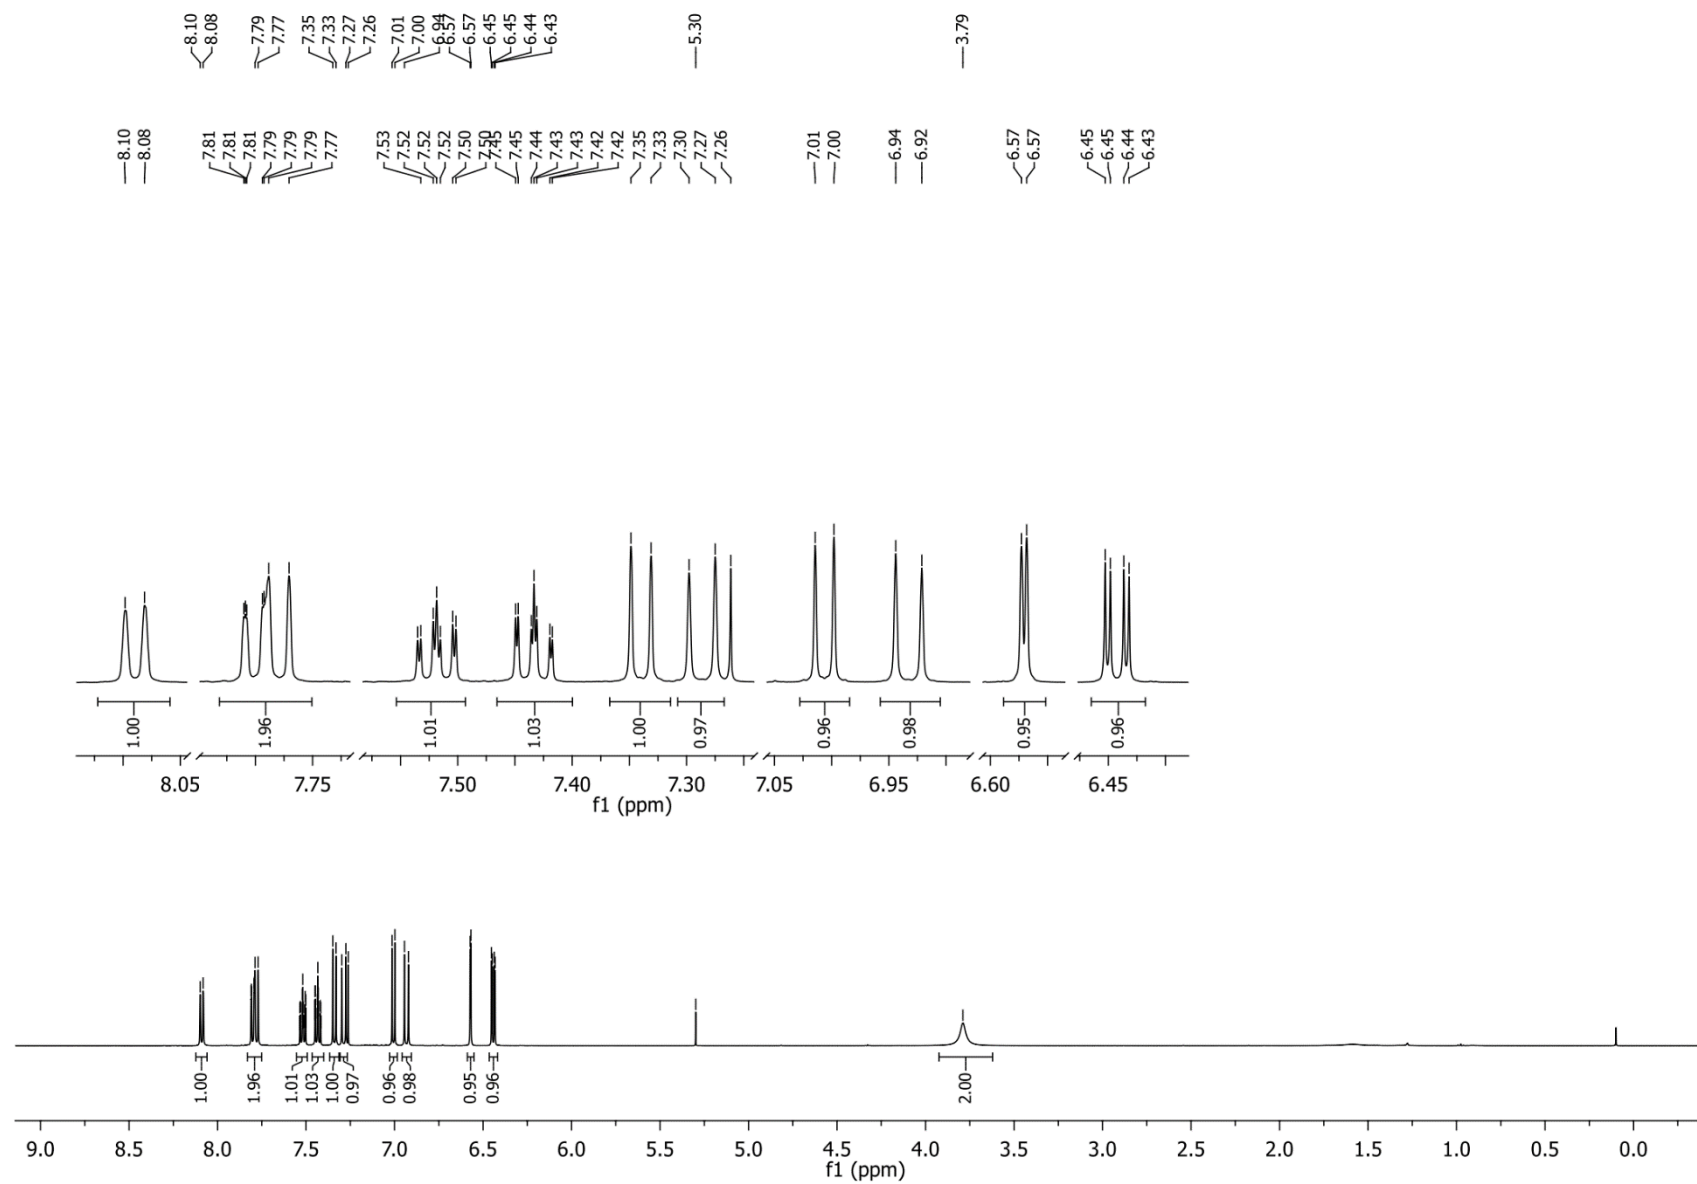

**Figure S51.** The <sup>1</sup>H NMR of benzo[*b*]naphtho[1,2-*f*]oxepin-9-amine (**3h**).

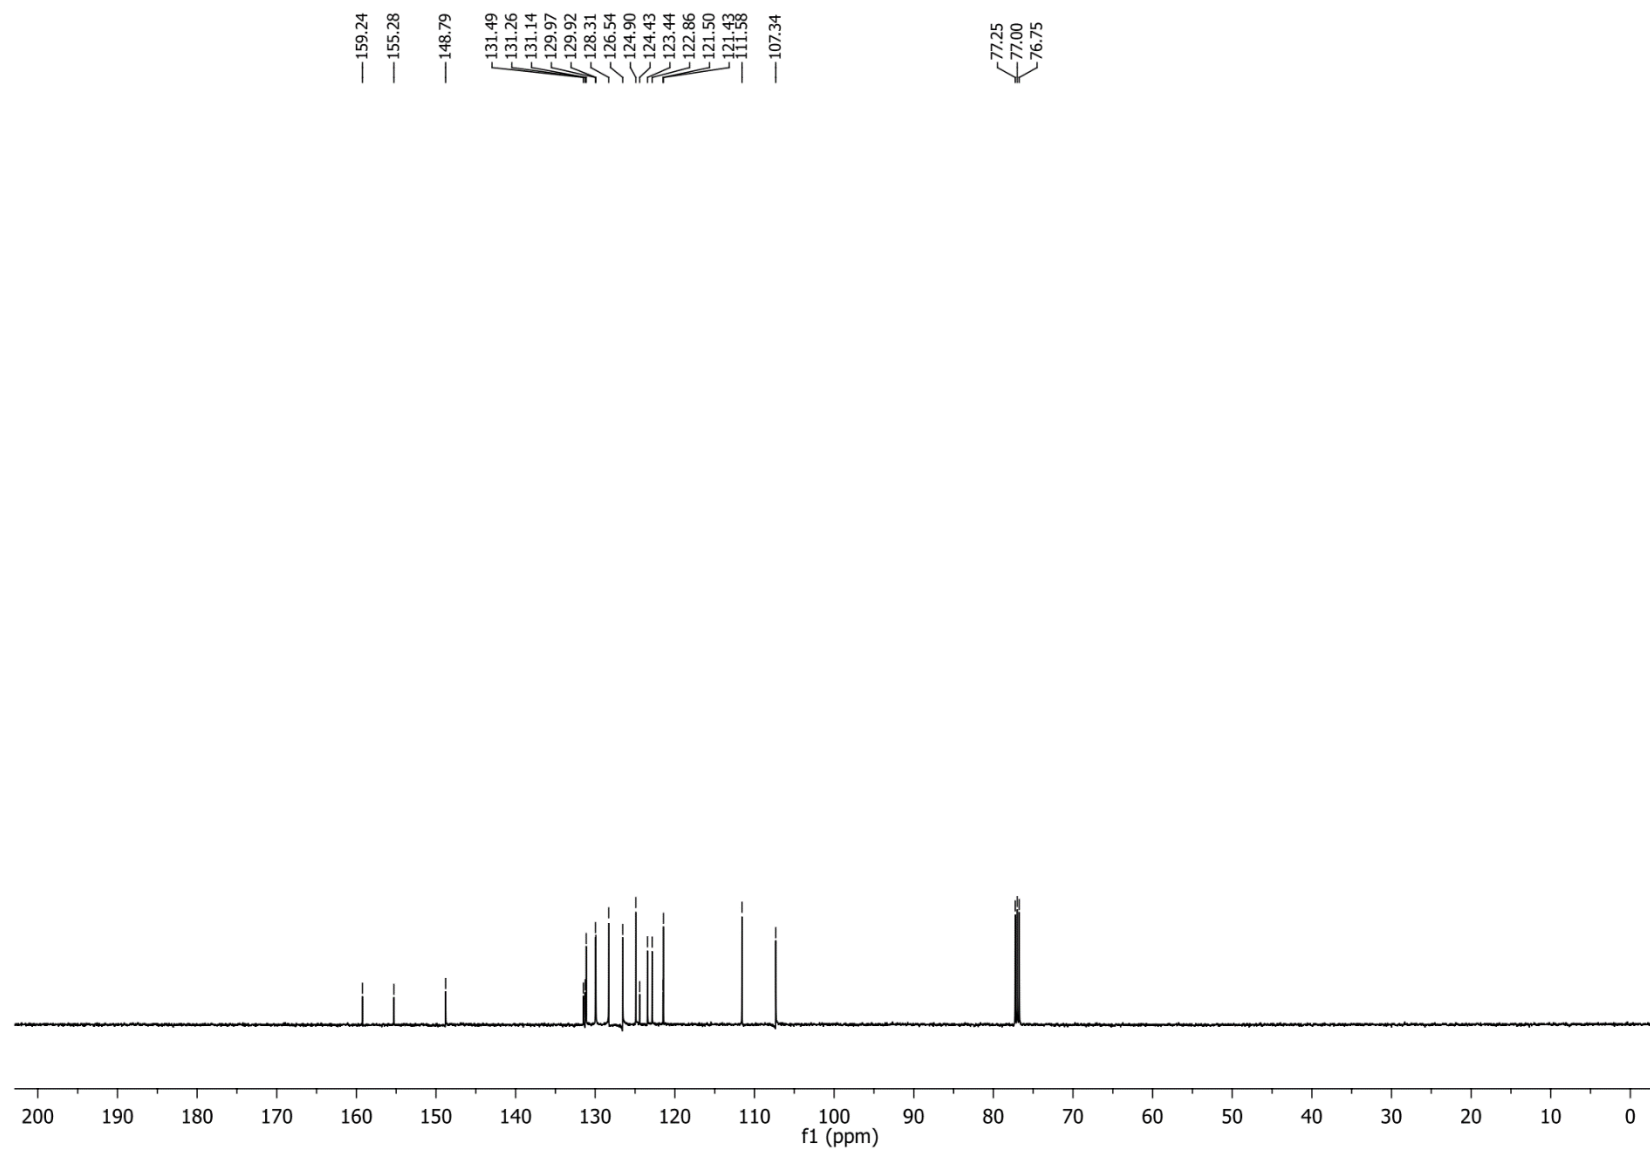

**Figure S52.** The  $^{13}\text{C}$  NMR of benzo[*b*]naphtho[1,2-*f*]oxepin-9-amine (**3h**).

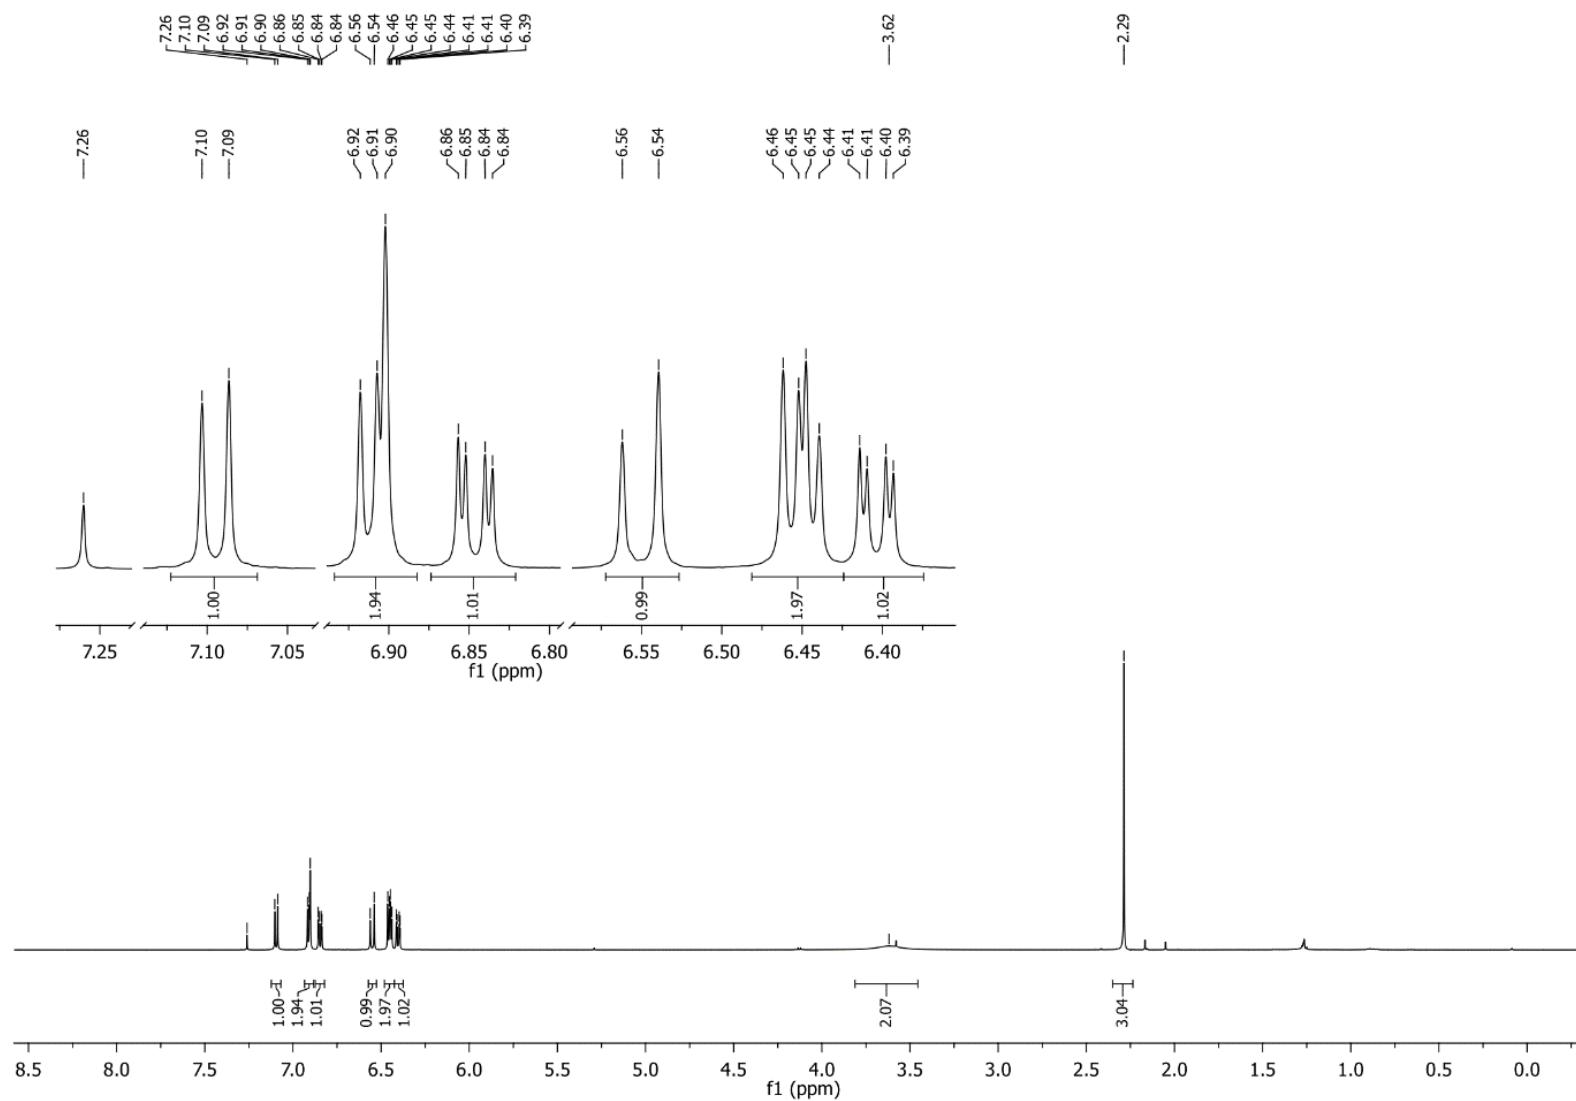

**Figure S53.** The  $^1\text{H}$  NMR of 7-aminodibenzo[*b,f*]oxepin-3-yl acetate (**3j**).

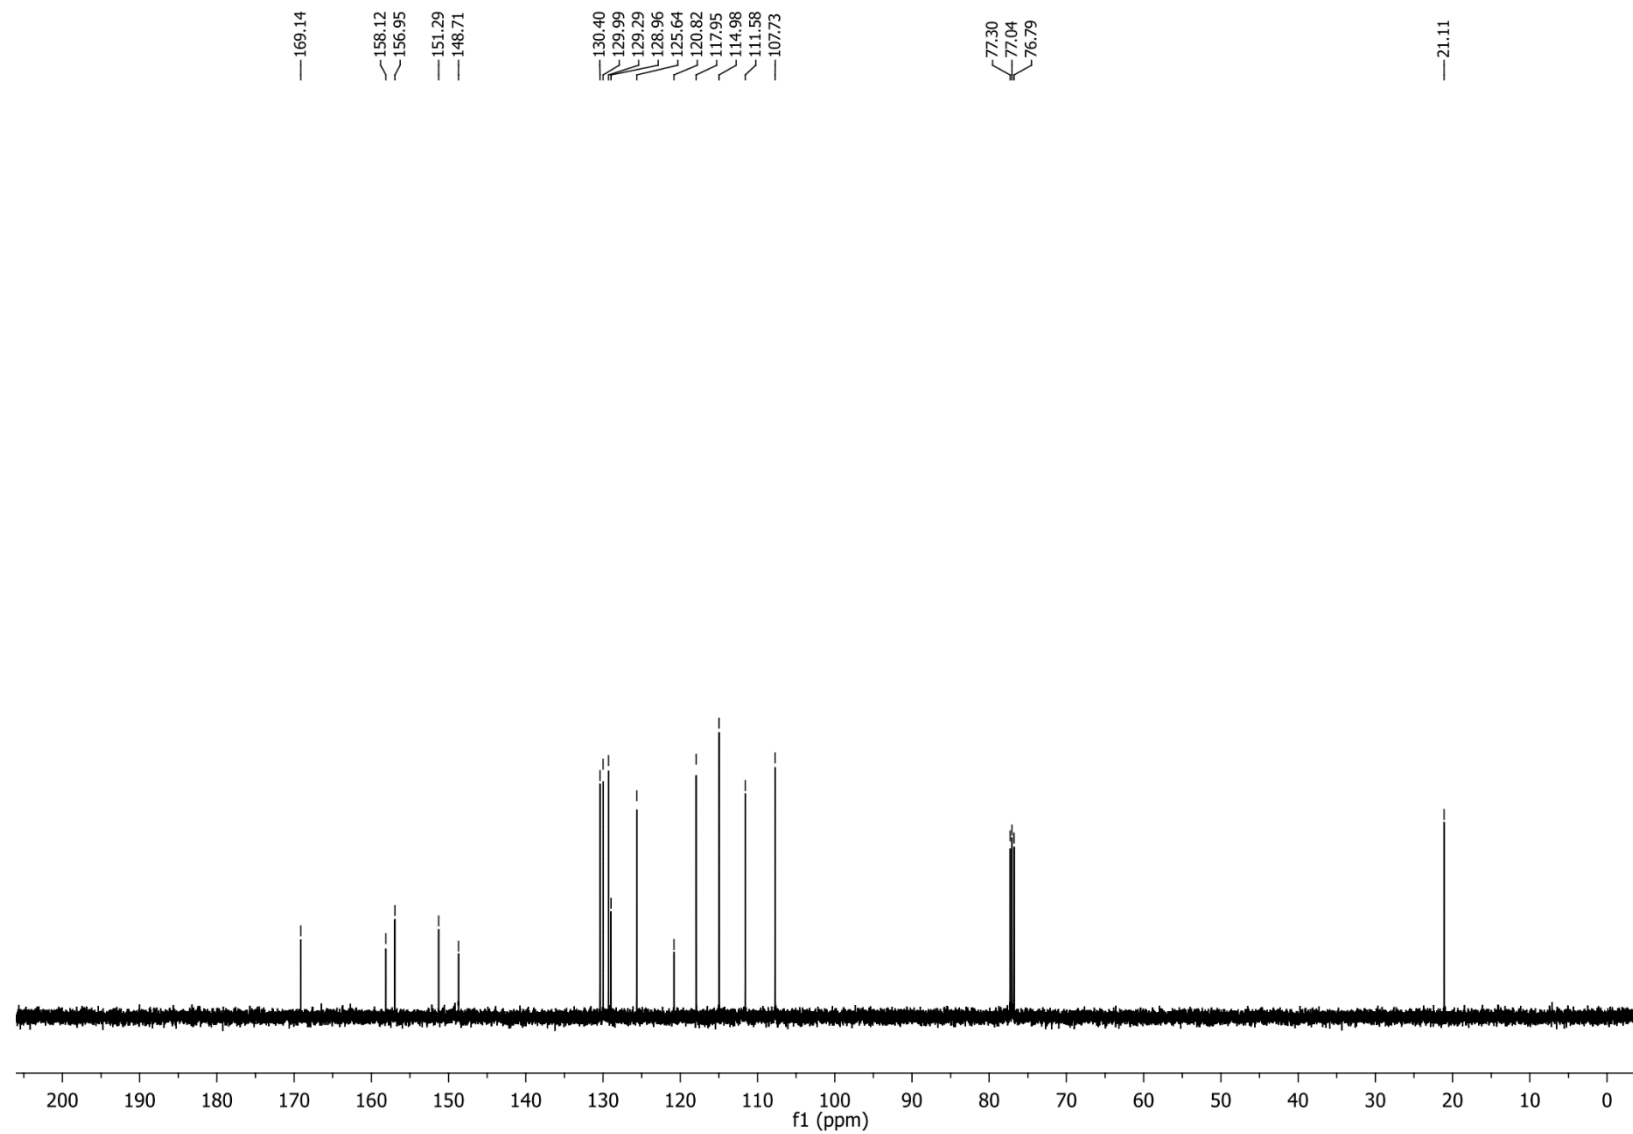

**Figure S54.** The  $^{13}\text{C}$  NMR of 7-aminodibenzo[*b,f*]oxepin-3-yl acetate (**3j**).

**Table S1-S7** The calculated coordinates of compounds (**1a**, **1c**, **1d**, **1i**, **2i**, **2j** and **3h**)

**Figures S55-S61** Visualization of calculated geometry of compounds (**1a**, **1c**, **1d**, **1i**, **2i**, **2j** and **3h**)

**Table S1.** The calculated coordinates of (**1a**) ( the part of calculated log file).

|               |               |             | Standard orientation   |          |          |
|---------------|---------------|-------------|------------------------|----------|----------|
|               |               |             | Coordinates(Angstroms) |          |          |
| Center Number | Atomic Number | Atomic Type | X                      | Y        | Z        |
| 1             | 6             | 0           | 0                      | 5,246598 | -1,82902 |
| 2             | 6             | 0           | 0                      | 3,865267 | -1,82381 |
| 3             | 6             | 0           | 0                      | 3,128214 | -0,67263 |
| 4             | 6             | 0           | 0                      | 3,864096 | 0,50163  |
| 5             | 6             | 0           | 0                      | 5,25579  | 0,497716 |
| 6             | 6             | 0           | 0                      | 5,944337 | -0,65624 |
| 7             | 6             | 0           | 0                      | 1,68167  | -0,79461 |
| 8             | 6             | 0           | 0                      | 0,745744 | 0,152234 |
| 9             | 6             | 0           | 0                      | -0,68455 | -0,12066 |
| 10            | 6             | 0           | 0                      | -1,18322 | -1,434   |
| 11            | 6             | 0           | 0                      | -2,52524 | -1,73711 |
| 12            | 6             | 0           | 0                      | -3,44284 | -0,71324 |
| 13            | 6             | 0           | 0                      | -3,0242  | 0,59308  |
| 14            | 6             | 0           | 0                      | -1,67081 | 0,875698 |
| 15            | 8             | 0           | 0                      | 3,182911 | 1,626543 |
| 16            | 7             | 0           | 0                      | -1,32961 | 2,299134 |
| 17            | 8             | 0           | 0                      | -0,43542 | 2,769427 |
| 18            | 8             | 0           | 0                      | -1,98668 | 2,947099 |
| 19            | 7             | 0           | 0                      | -4,86949 | -1,01558 |
| 20            | 8             | 0           | 0                      | -5,65069 | -0,08789 |
| 21            | 8             | 0           | 0                      | -5,21359 | -2,18579 |
| 22            | 1             | 0           | 0                      | 5,777135 | -2,73394 |
| 23            | 1             | 0           | 0                      | 3,316145 | -2,73303 |
| 24            | 1             | 0           | 0                      | 5,796012 | 1,412656 |
| 25            | 1             | 0           | 0                      | 7,026776 | -0,63766 |
| 26            | 1             | 0           | 0                      | 1,345882 | -1,80086 |
| 27            | 1             | 0           | 0                      | 1,052376 | 1,166025 |
| 28            | 1             | 0           | 0                      | -0,48686 | -2,23675 |
| 29            | 1             | 0           | 0                      | -2,87238 | -2,75108 |
| 30            | 1             | 0           | 0                      | -3,73716 | 1,38195  |
| 31            | 1             | 0           | 0                      | 3,798391 | 2,358281 |

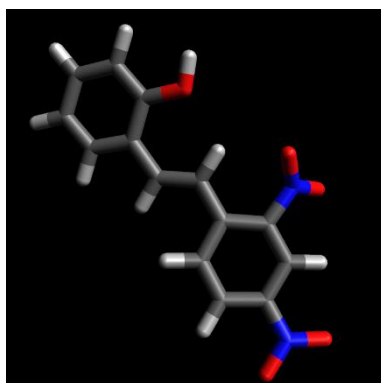

**Figure S55.** Visualization of calculated geometry of (**1a**).



**Table S2.** The calculated coordinates of (**1c**) ( the part of calculated log file).

|               |               |             | Standard orientation   |          |          |
|---------------|---------------|-------------|------------------------|----------|----------|
|               |               |             | Coordinates(Angstroms) |          |          |
| Center Number | Atomic Number | Atomic Type | X                      | Y        | Z        |
| 1             | 6             | 0           | 4,600514               | -1,46898 | 0,246864 |
| 2             | 6             | 0           | 3,220456               | -1,53361 | 0,201936 |
| 3             | 6             | 0           | 2,396917               | -0,41594 | -0,02811 |
| 4             | 6             | 0           | 3,059785               | 0,824892 | -0,22232 |
| 5             | 6             | 0           | 4,441237               | 0,907331 | -0,17939 |
| 6             | 6             | 0           | 5,219598               | -0,22859 | 0,054537 |
| 7             | 6             | 0           | 0,967962               | -0,63005 | -0,04484 |
| 8             | 6             | 0           | -0,03782               | 0,267229 | -0,20131 |
| 9             | 6             | 0           | -1,44323               | -0,0921  | -0,17886 |
| 10            | 6             | 0           | -1,86948               | -1,43601 | -0,31333 |
| 11            | 6             | 0           | -3,18967               | -1,81485 | -0,24644 |
| 12            | 6             | 0           | -4,16736               | -0,84319 | -0,0258  |
| 13            | 6             | 0           | -3,8228                | 0,486917 | 0,118554 |
| 14            | 6             | 0           | -2,48904               | 0,847825 | 0,017655 |
| 15            | 8             | 0           | 2,303119               | 1,927978 | -0,45363 |
| 16            | 8             | 0           | 6,556959               | -0,02578 | 0,07501  |
| 17            | 6             | 0           | 7,417783               | -1,14305 | 0,309267 |
| 18            | 7             | 0           | -2,23607               | 2,29062  | 0,152358 |
| 19            | 8             | 0           | -1,3686                | 2,803203 | -0,54696 |
| 20            | 8             | 0           | -2,93545               | 2,914453 | 0,946277 |
| 21            | 7             | 0           | -5,57016               | -1,22579 | 0,045533 |
| 22            | 8             | 0           | -6,40568               | -0,34287 | 0,234047 |
| 23            | 8             | 0           | -5,84796               | -2,41687 | -0,0849  |
| 24            | 1             | 0           | 5,173865               | -2,3663  | 0,427497 |
| 25            | 1             | 0           | 2,741717               | -2,49493 | 0,351866 |
| 26            | 1             | 0           | 4,936436               | 1,860943 | -0,32867 |
| 27            | 1             | 0           | 0,706023               | -1,67167 | 0,115769 |
| 28            | 1             | 0           | 0,202038               | 1,307736 | -0,32143 |
| 29            | 1             | 0           | -1,13063               | -2,20269 | -0,49845 |
| 30            | 1             | 0           | -3,47707               | -2,84937 | -0,36966 |
| 31            | 1             | 0           | -4,57943               | 1,235848 | 0,295914 |
| 32            | 1             | 0           | 2,866554               | 2,709406 | -0,56709 |
| 33            | 1             | 0           | 8,428756               | -0,74373 | 0,28596  |
| 34            | 1             | 0           | 7,223093               | -1,5899  | 1,287029 |
| 35            | 1             | 0           | 7,303892               | -1,89695 | -0,47326 |

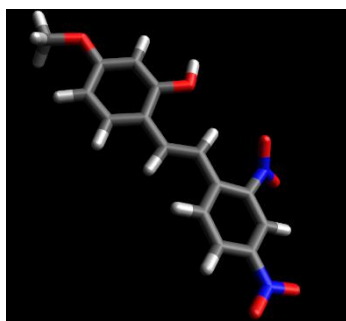**Figure S56.** Visualization of calculated geometry of (**1c**).

**Table S3.** The calculated coordinates of (**1d**) ( the part of calculated log file).

|               |               |             | Standard orientation   |          |          |
|---------------|---------------|-------------|------------------------|----------|----------|
|               |               |             | Coordinates(Angstroms) |          |          |
| Center Number | Atomic Number | Atomic Type | X                      | Y        | Z        |
| 1             | 6             | 0           | 4,513663               | 0,466444 | -0,18315 |
| 2             | 6             | 0           | 3,128619               | 0,387569 | -0,22262 |
| 3             | 6             | 0           | 2,447703               | -0,80645 | 0,050849 |
| 4             | 6             | 0           | 3,214374               | -1,94968 | 0,370534 |
| 5             | 6             | 0           | 4,6006                 | -1,86942 | 0,408702 |
| 6             | 6             | 0           | 5,255905               | -0,67464 | 0,135971 |
| 7             | 6             | 0           | 0,998632               | -0,91868 | 0,00963  |
| 8             | 6             | 0           | 0,123333               | 0,099683 | -0,13607 |
| 9             | 6             | 0           | -1,32126               | -0,06589 | -0,17278 |
| 10            | 6             | 0           | -1,90178               | -1,32919 | -0,42902 |
| 11            | 6             | 0           | -3,26176               | -1,54192 | -0,42939 |
| 12            | 6             | 0           | -4,1153                | -0,47369 | -0,1573  |
| 13            | 6             | 0           | -3,61542               | 0,786156 | 0,107564 |
| 14            | 6             | 0           | -2,24358               | 0,981382 | 0,07656  |
| 15            | 8             | 0           | 2,548211               | -3,11111 | 0,642291 |
| 16            | 7             | 0           | -1,81649               | 2,364561 | 0,346667 |
| 17            | 8             | 0           | -2,48396               | 3,01452  | 1,144599 |
| 18            | 8             | 0           | -0,8411                | 2,806816 | -0,25224 |
| 19            | 7             | 0           | -5,56066               | -0,67942 | -0,1572  |
| 20            | 8             | 0           | -6,28317               | 0,285219 | 0,081747 |
| 21            | 8             | 0           | -5,97752               | -1,81048 | -0,3945  |
| 22            | 8             | 0           | 5,056556               | 1,687167 | -0,47254 |
| 23            | 6             | 0           | 6,475082               | 1,816678 | -0,44666 |
| 24            | 1             | 0           | 2,580117               | 1,282485 | -0,48674 |
| 25            | 1             | 0           | 5,179987               | -2,75304 | 0,656336 |
| 26            | 1             | 0           | 6,336025               | -0,65069 | 0,173351 |
| 27            | 1             | 0           | 0,627309               | -1,92773 | 0,135965 |
| 28            | 1             | 0           | 0,490468               | 1,111011 | -0,20012 |
| 29            | 1             | 0           | -1,25423               | -2,16373 | -0,65811 |
| 30            | 1             | 0           | -3,67133               | -2,51858 | -0,64499 |
| 31            | 1             | 0           | -4,2797                | 1,608359 | 0,325587 |
| 32            | 1             | 0           | 3,179351               | -3,82544 | 0,817285 |
| 33            | 1             | 0           | 6,683284               | 2,853663 | -0,70049 |
| 34            | 1             | 0           | 6,875828               | 1,599308 | 0,547608 |
| 35            | 1             | 0           | 6,947966               | 1,161225 | -1,18376 |

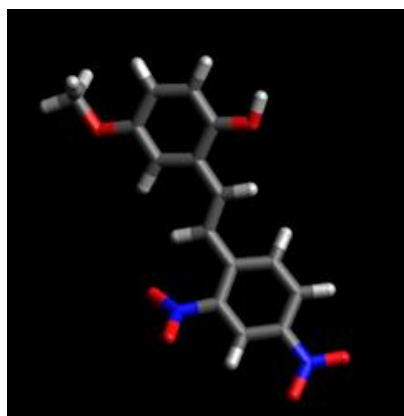**Figure S57.** Visualization of calculated geometry of (**1d**).

**Table S4.** The calculated coordinates of (**1i**) ( the part of calculated log file).

|               |               |             | Standard orientation   |          |          |
|---------------|---------------|-------------|------------------------|----------|----------|
|               |               |             | Coordinates(Angstroms) |          |          |
| Center Number | Atomic Number | Atomic Type | X                      | Y        | Z        |
| 1             | 6             | 0           | 4,918542               | -1,72147 | 0,328398 |
| 2             | 6             | 0           | 3,540586               | -1,73956 | 0,274652 |
| 3             | 6             | 0           | 2,763824               | -0,58991 | 0,023282 |
| 4             | 6             | 0           | 3,47529                | 0,620502 | -0,18056 |
| 5             | 6             | 0           | 4,861874               | 0,652988 | -0,12884 |
| 6             | 6             | 0           | 5,584887               | -0,50898 | 0,124676 |
| 7             | 6             | 0           | 1,327758               | -0,7469  | -0,00423 |
| 8             | 6             | 0           | 0,359681               | 0,18782  | -0,18    |
| 9             | 6             | 0           | -1,0589                | -0,11498 | -0,16794 |
| 10            | 6             | 0           | -1,5366                | -1,44264 | -0,29116 |
| 11            | 6             | 0           | -2,87119               | -1,76862 | -0,23362 |
| 12            | 6             | 0           | -3,8122                | -0,75681 | -0,03479 |
| 13            | 6             | 0           | -3,41696               | 0,560267 | 0,097519 |
| 14            | 6             | 0           | -2,069                 | 0,867646 | 0,006582 |
| 15            | 8             | 0           | 2,764847               | 1,748544 | -0,43108 |
| 16            | 8             | 0           | 6,936312               | -0,39973 | 0,159403 |
| 17            | 7             | 0           | -1,76156               | 2,300991 | 0,127086 |
| 18            | 8             | 0           | -0,86451               | 2,770348 | -0,5653  |
| 19            | 8             | 0           | -2,44732               | 2,962136 | 0,902574 |
| 20            | 7             | 0           | -5,22949               | -1,08327 | 0,02654  |
| 21            | 8             | 0           | -6,03169               | -0,16606 | 0,19521  |
| 22            | 8             | 0           | -5,55249               | -2,2642  | -0,0919  |
| 23            | 1             | 0           | 5,47984                | -2,62826 | 0,523856 |
| 24            | 1             | 0           | 3,023118               | -2,67922 | 0,432412 |
| 25            | 1             | 0           | 5,393003               | 1,585591 | -0,28675 |
| 26            | 1             | 0           | 1,023046               | -1,77545 | 0,164984 |
| 27            | 1             | 0           | 0,641727               | 1,216562 | -0,30874 |
| 28            | 1             | 0           | -0,82687               | -2,24006 | -0,45948 |
| 29            | 1             | 0           | -3,19788               | -2,79251 | -0,34746 |
| 30            | 1             | 0           | -4,14517               | 1,340535 | 0,257965 |
| 31            | 1             | 0           | 3,358632               | 2,506454 | -0,54976 |
| 32            | 1             | 0           | 7,341153               | -1,26227 | 0,342526 |
| 1             | 6             | 0           | 4,918542               | -1,72147 | 0,328398 |
| 2             | 6             | 0           | 3,540586               | -1,73956 | 0,274652 |
| 3             | 6             | 0           | 2,763824               | -0,58991 | 0,023282 |

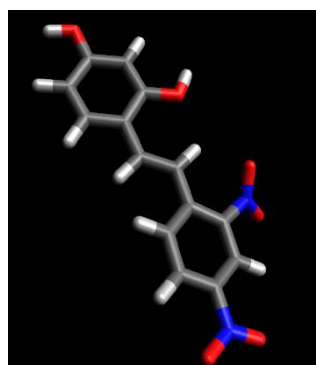**Figure S58.** Visualization of calculated geometry of (**1i**).

**Table S5.** The calculated coordinates of (**2i**) ( the part of calculated log file).

|               |               |             | Standard orientation   |          |          |
|---------------|---------------|-------------|------------------------|----------|----------|
|               |               |             | Coordinates(Angstroms) |          |          |
| Center Number | Atomic Number | Atomic Type | X                      | Y        | Z        |
| 1             | 6             | 0           | 3,636264               | -1,36171 | -0,23615 |
| 2             | 6             | 0           | 4,230331               | -0,17388 | -0,66455 |
| 3             | 6             | 0           | 3,547301               | 1,018694 | -0,51443 |
| 4             | 6             | 0           | 2,26066                | 1,082145 | 0,047113 |
| 5             | 6             | 0           | 1,702678               | -0,12915 | 0,480094 |
| 6             | 6             | 0           | 2,367158               | -1,33568 | 0,343113 |
| 7             | 6             | 0           | 1,583376               | 2,362991 | 0,157186 |
| 8             | 6             | 0           | 0,258433               | 2,601504 | 0,223615 |
| 9             | 6             | 0           | -0,80855               | 1,616337 | 0,158563 |
| 10            | 6             | 0           | -0,64214               | 0,271827 | 0,541672 |
| 11            | 8             | 0           | 0,5058                 | -0,15631 | 1,187558 |
| 12            | 6             | 0           | -2,07345               | 1,999872 | -0,32042 |
| 13            | 6             | 0           | -3,1147                | 1,099215 | -0,44524 |
| 14            | 6             | 0           | -2,89392               | -0,22395 | -0,07914 |
| 15            | 6             | 0           | -1,6651                | -0,64873 | 0,415449 |
| 16            | 8             | 0           | 4,343103               | -2,51255 | -0,39094 |
| 17            | 7             | 0           | -3,97942               | -1,19209 | -0,19823 |
| 18            | 8             | 0           | -5,05898               | -0,80163 | -0,64049 |
| 19            | 8             | 0           | -3,76371               | -2,35339 | 0,146182 |
| 20            | 1             | 0           | 5,220629               | -0,20139 | -1,10142 |
| 21            | 1             | 0           | 4,013203               | 1,940199 | -0,84507 |
| 22            | 1             | 0           | 1,902769               | -2,2433  | 0,712209 |
| 23            | 1             | 0           | 2,234087               | 3,230716 | 0,10222  |
| 24            | 1             | 0           | -0,06486               | 3,637016 | 0,216316 |
| 25            | 1             | 0           | -2,22912               | 3,033906 | -0,60431 |
| 26            | 1             | 0           | -4,08164               | 1,405717 | -0,81643 |
| 27            | 1             | 0           | -1,51582               | -1,67275 | 0,725493 |
| 28            | 1             | 0           | 3,836853               | -3,2714  | -0,06115 |

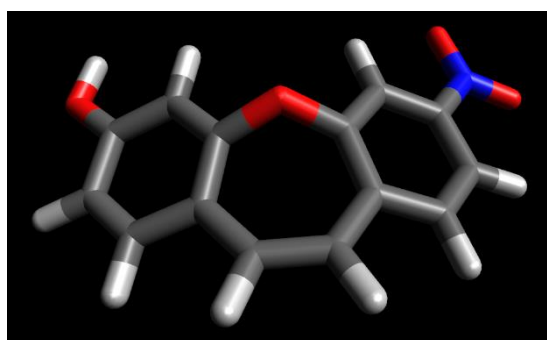

**Figure S59.** Visualization of calculated geometry of (**2i**).

**Table S6.** The calculated coordinates of (2j) ( the part of calculated log file).

|               |               |             | Standard orientation   |          |          |
|---------------|---------------|-------------|------------------------|----------|----------|
|               |               |             | Coordinates(Angstroms) |          |          |
| Center Number | Atomic Number | Atomic Type | X                      | Y        | Z        |
| 1             | 6             | 0           | 2,947276               | -0,13861 | -0,55254 |
| 2             | 6             | 0           | 3,212441               | 1,164023 | -0,95086 |
| 3             | 6             | 0           | 2,271601               | 2,147972 | -0,68791 |
| 4             | 6             | 0           | 1,056761               | 1,860989 | -0,04834 |
| 5             | 6             | 0           | 0,832914               | 0,531506 | 0,338406 |
| 6             | 6             | 0           | 1,759268               | -0,46765 | 0,085751 |
| 7             | 6             | 0           | 0,09412                | 2,931653 | 0,181235 |
| 8             | 6             | 0           | -1,2413                | 2,824814 | 0,304007 |
| 9             | 6             | 0           | -2,03528               | 1,607108 | 0,215513 |
| 10            | 6             | 0           | -1,52613               | 0,333679 | 0,526372 |
| 11            | 8             | 0           | -0,2738                | 0,181874 | 1,09968  |
| 12            | 6             | 0           | -3,3735                | 1,685733 | -0,20366 |
| 13            | 6             | 0           | -4,16568               | 0,559687 | -0,33652 |
| 14            | 6             | 0           | -3,61069               | -0,67883 | -0,03761 |
| 15            | 6             | 0           | -2,29575               | -0,80684 | 0,395095 |
| 16            | 8             | 0           | 3,849061               | -1,15336 | -0,86713 |
| 17            | 6             | 0           | 4,867614               | -1,51977 | -0,02313 |
| 18            | 8             | 0           | 5,595774               | -2,40396 | -0,38674 |
| 19            | 6             | 0           | 4,989975               | -0,78985 | 1,285485 |
| 20            | 7             | 0           | -4,43174               | -1,88274 | -0,16427 |
| 21            | 8             | 0           | -5,59066               | -1,75383 | -0,55263 |
| 22            | 8             | 0           | -3,92229               | -2,96433 | 0,121041 |
| 23            | 1             | 0           | 4,140522               | 1,399233 | -1,45705 |
| 24            | 1             | 0           | 2,472676               | 3,169143 | -0,99044 |
| 25            | 1             | 0           | 1,558865               | -1,48417 | 0,400397 |
| 26            | 1             | 0           | 0,510415               | 3,934113 | 0,169274 |
| 27            | 1             | 0           | -1,81152               | 3,744675 | 0,380964 |
| 28            | 1             | 0           | -3,79103               | 2,65902  | -0,43241 |
| 29            | 1             | 0           | -5,19335               | 0,630337 | -0,66144 |
| 30            | 1             | 0           | -1,88542               | -1,7731  | 0,65027  |
| 31            | 1             | 0           | 5,128607               | 0,28016  | 1,120537 |
| 32            | 1             | 0           | 4,083817               | -0,91282 | 1,881725 |
| 33            | 1             | 0           | 5,84213                | -1,19225 | 1,826455 |

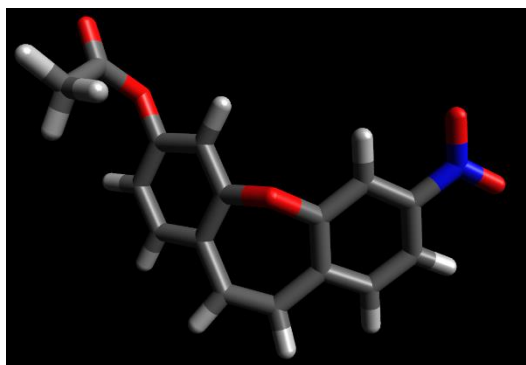**Figure S60.** Visualization of calculated geometry of (2j).

**Table S7.** The calculated coordinates of (**3h**) ( the part of calculated log file).

|               |               |             | Standard orientation   |          |          |
|---------------|---------------|-------------|------------------------|----------|----------|
|               |               |             | Coordinates(Angstroms) |          |          |
| Center Number | Atomic Number | Atomic Type | X                      | Y        | Z        |
| 1             | 6             | 0           | -2,15002               | -2,14578 | 0,085908 |
| 2             | 6             | 0           | -2,93467               | -0,99044 | -0,14732 |
| 3             | 6             | 0           | -2,35916               | 0,302878 | 0,059475 |
| 4             | 6             | 0           | -1,00014               | 0,414836 | 0,525499 |
| 5             | 6             | 0           | -0,29254               | -0,75878 | 0,726912 |
| 6             | 6             | 0           | -0,85245               | -2,02978 | 0,504715 |
| 7             | 6             | 0           | -0,40182               | 1,724661 | 0,775946 |
| 8             | 6             | 0           | 0,895666               | 2,060169 | 0,636816 |
| 9             | 6             | 0           | 1,993861               | 1,191641 | 0,244273 |
| 10            | 6             | 0           | 1,994097               | -0,18597 | 0,503707 |
| 11            | 8             | 0           | 0,985223               | -0,75012 | 1,279124 |
| 12            | 6             | 0           | 3,129993               | 1,705759 | -0,40015 |
| 13            | 6             | 0           | 4,18287                | 0,900053 | -0,79327 |
| 14            | 6             | 0           | 4,151747               | -0,48063 | -0,5407  |
| 15            | 6             | 0           | 3,036076               | -1,01106 | 0,122826 |
| 16            | 7             | 0           | 5,176832               | -1,30852 | -0,97242 |
| 17            | 6             | 0           | -4,2774                | -1,09692 | -0,58818 |
| 18            | 6             | 0           | -5,03401               | 0,020738 | -0,82926 |
| 19            | 6             | 0           | -4,46764               | 1,29852  | -0,64501 |
| 20            | 6             | 0           | -3,16884               | 1,434974 | -0,2183  |
| 21            | 1             | 0           | -2,59051               | -3,12415 | -0,0695  |
| 22            | 1             | 0           | -0,24033               | -2,90223 | 0,697537 |
| 23            | 1             | 0           | -1,08406               | 2,524114 | 1,037299 |
| 24            | 1             | 0           | 1,15442                | 3,10625  | 0,774897 |
| 25            | 1             | 0           | 3,177289               | 2,771236 | -0,59832 |
| 26            | 1             | 0           | 5,041644               | 1,333591 | -1,29345 |
| 27            | 1             | 0           | 2,988818               | -2,06561 | 0,369026 |
| 28            | 1             | 0           | 6,07256                | -0,86521 | -1,12827 |
| 29            | 1             | 0           | 5,262407               | -2,19899 | -0,50026 |
| 30            | 1             | 0           | -4,6963                | -2,08653 | -0,73548 |
| 31            | 1             | 0           | -6,05935               | -0,0734  | -1,16686 |
| 32            | 1             | 0           | -5,06036               | 2,182791 | -0,84886 |
| 33            | 1             | 0           | -2,75968               | 2,429537 | -0,10716 |

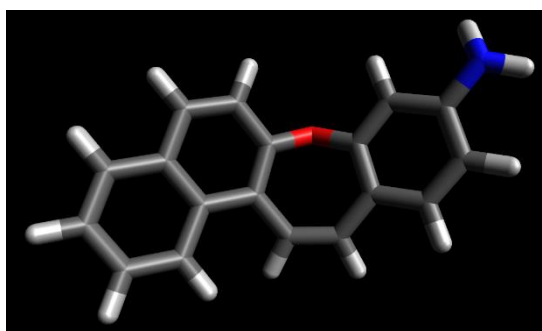**Figure S61.** Visualization of calculated geometry of (**3h**).

**Table S8.** Estimated binding free energy, visualization of binding pose and predicted interactions with  $\alpha\beta$ -tubulin heterodimer for compounds (**1a**, **1c**, **1d**, **1i**, **2i**, **2j**, **3h**). For comparison native ligand structure is superimposed as yellow sticks.

| Compound  | Binding pose and interactions                                                      | Binding pose and interactions superimposed with DAMA-colchicine                      | Estimated binding free energy (kJ/mol) | Type of interaction      | Active residues                                |
|-----------|------------------------------------------------------------------------------------|--------------------------------------------------------------------------------------|----------------------------------------|--------------------------|------------------------------------------------|
| <b>1a</b> | 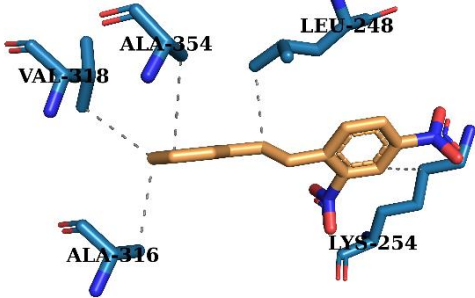  |    | -32.6                                  | Hydrophobic Interactions | LEU248<br>LYS254<br>ALA316<br>VAL318<br>ALA354 |
| <b>1c</b> |  |  | -32.2                                  | Hydrophobic Interactions | LEU248<br>ALA250<br>LYS254<br>LEU255           |

|    |                                                                                    |                                                                                     |       |                          |                                                          |
|----|------------------------------------------------------------------------------------|-------------------------------------------------------------------------------------|-------|--------------------------|----------------------------------------------------------|
| 1d | 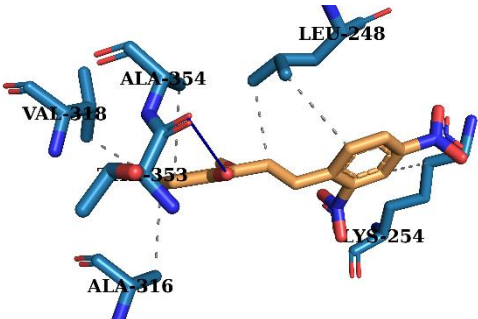  |   | -32.6 | Hydrophobic Interactions | LEU248<br>LYS254<br>ALA316<br>VAL318<br>ALA354           |
|    |                                                                                    |                                                                                     |       | Hydrogen Bonds           | THR353                                                   |
| 1i |   |   | -32.6 | Hydrophobic Interactions | LEU242<br>LEU248<br>ALA250<br>LEU255<br>LYS352<br>ILE378 |
|    |                                                                                    |                                                                                     |       | Hydrogen Bonds           | TYR202                                                   |
| 2i |  |  | -33.9 | Hydrophobic Interactions | LEU248<br>ALA250<br>LYS254<br>LEU255<br>VAL318<br>ALA354 |
|    |                                                                                    |                                                                                     |       | Hydrogen Bonds           | ALA316<br>ALA354                                         |



|    |                                                                                   |                                                                                     |       |                          |                                                                              |
|----|-----------------------------------------------------------------------------------|-------------------------------------------------------------------------------------|-------|--------------------------|------------------------------------------------------------------------------|
| 2j | 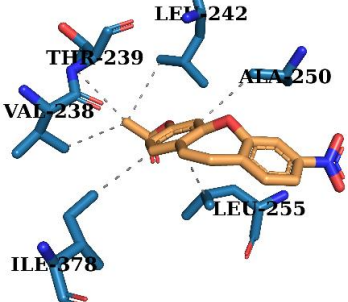 |  | -36.0 | Hydrophobic Interactions | VAL238<br>THR239<br>LEU242<br>ALA250<br>LEU255<br>ILE378                     |
| 3h |  |   | -38.9 | Hydrophobic Interactions | ALA180<br>LEU248<br>LYS254<br>LEU255<br>VAL318<br>LYS352<br>ALA354<br>ILE378 |
|    |                                                                                   |                                                                                     |       | Hydrogen Bonds           | TYR202<br>VAL238                                                             |
